# Supplementary material for: Tuning Cyanide Coordination Electronic Structure Enables Stable Prussian Blue Analogues for Sodium-ion Batteries
Source: Research Square preprint supplement (doi:10.21203/rs.3.rs-5878834/v1), 2025-02-04
Supplement: Supplementary file 1 [file 883f99598abc8ba38e8299a1.docx]

*Supplementary Information*

**Tuning** **Cyanide** **Coordination Electronic Structure Enables Stable Prussian Blue** **Analogues for Sodium-ion Batteries**

Yuanheng Wang 1, Jiaxin Yan 1, Bingxing Xie 2,*, Yan Meng 1, Chuankai Fu 1, Fanpeng Kong 1, Xingyu Wang 1, Qingjie Zhou 1, Xin Chen 1, Jianting Li 1, Chunyu Du 1, Liguang Wang 3,*, Pengjian Zuo 1,*

1 State Key Laboratory of Space Power-Sources, MIIT Key Laboratory of Critical Materials Technology for New Energy Conversion and Storage, School of Chemistry and Chemical Engineering, Harbin Institute of Technology, No.92 West-Da Zhi Street, Harbin 150001, China

2 School of New Energy, Nanjing University of Science and Technology, Jiangyin 214443, PR China

3 College of Chemical and Biological Engineering, Zhejiang University, Hangzhou, 310058, China

**Corresponding Author**

*[zuopj@hit.edu.cn](mailto:zuopj@hit.edu.cn); [bingxingxie@njust.edu.cn](mailto:bingxingxie@njust.edu.cn); [wanglg@zju.edu.cn](mailto:wanglg@zju.edu.cn)

**Supporting equation**

*i* = *avb*Equation S1

log(*i*) = *b*log(*v*) + log(*a*) Equation S2

where *i* and *v* represent the peak current and scan rate, respectively, *a* and *b* are constant. The value of *b* reveals the sodium storage mechanism, i.e., a diffusion-limited process with *b* = 0.5, a surface-limited process with *b* = 1.0.


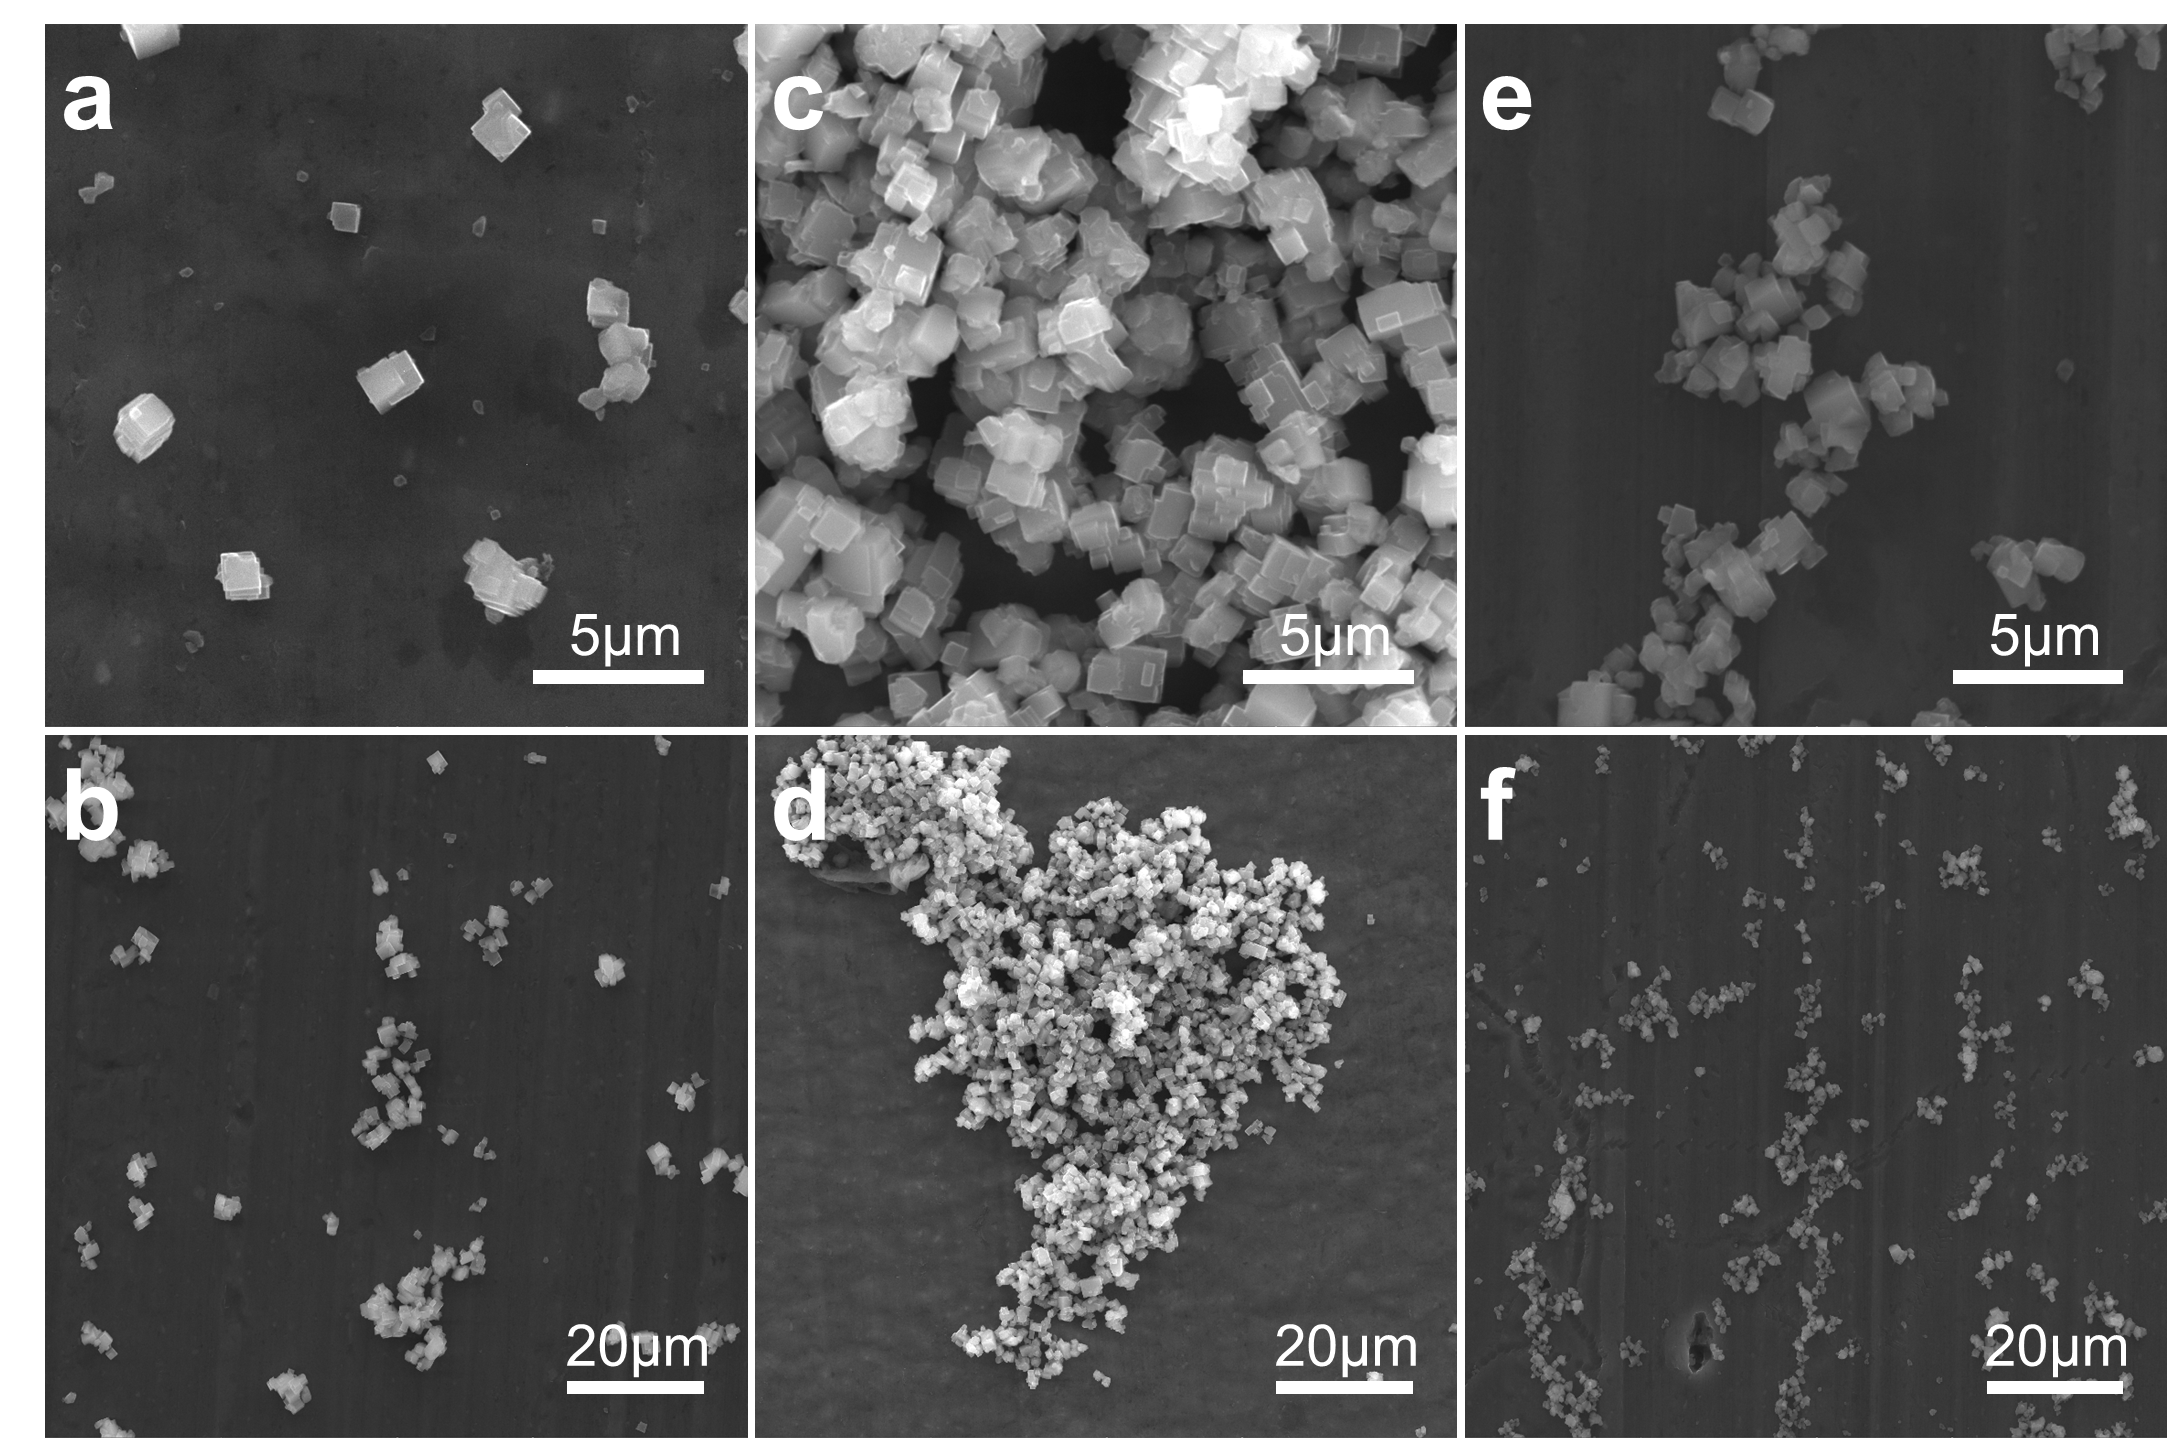


Fig.S1 SEM images of the samples: **a**, **b** M2-PBA, **c**, **d** M4-PBA, and **e**, **f** M5-PBA


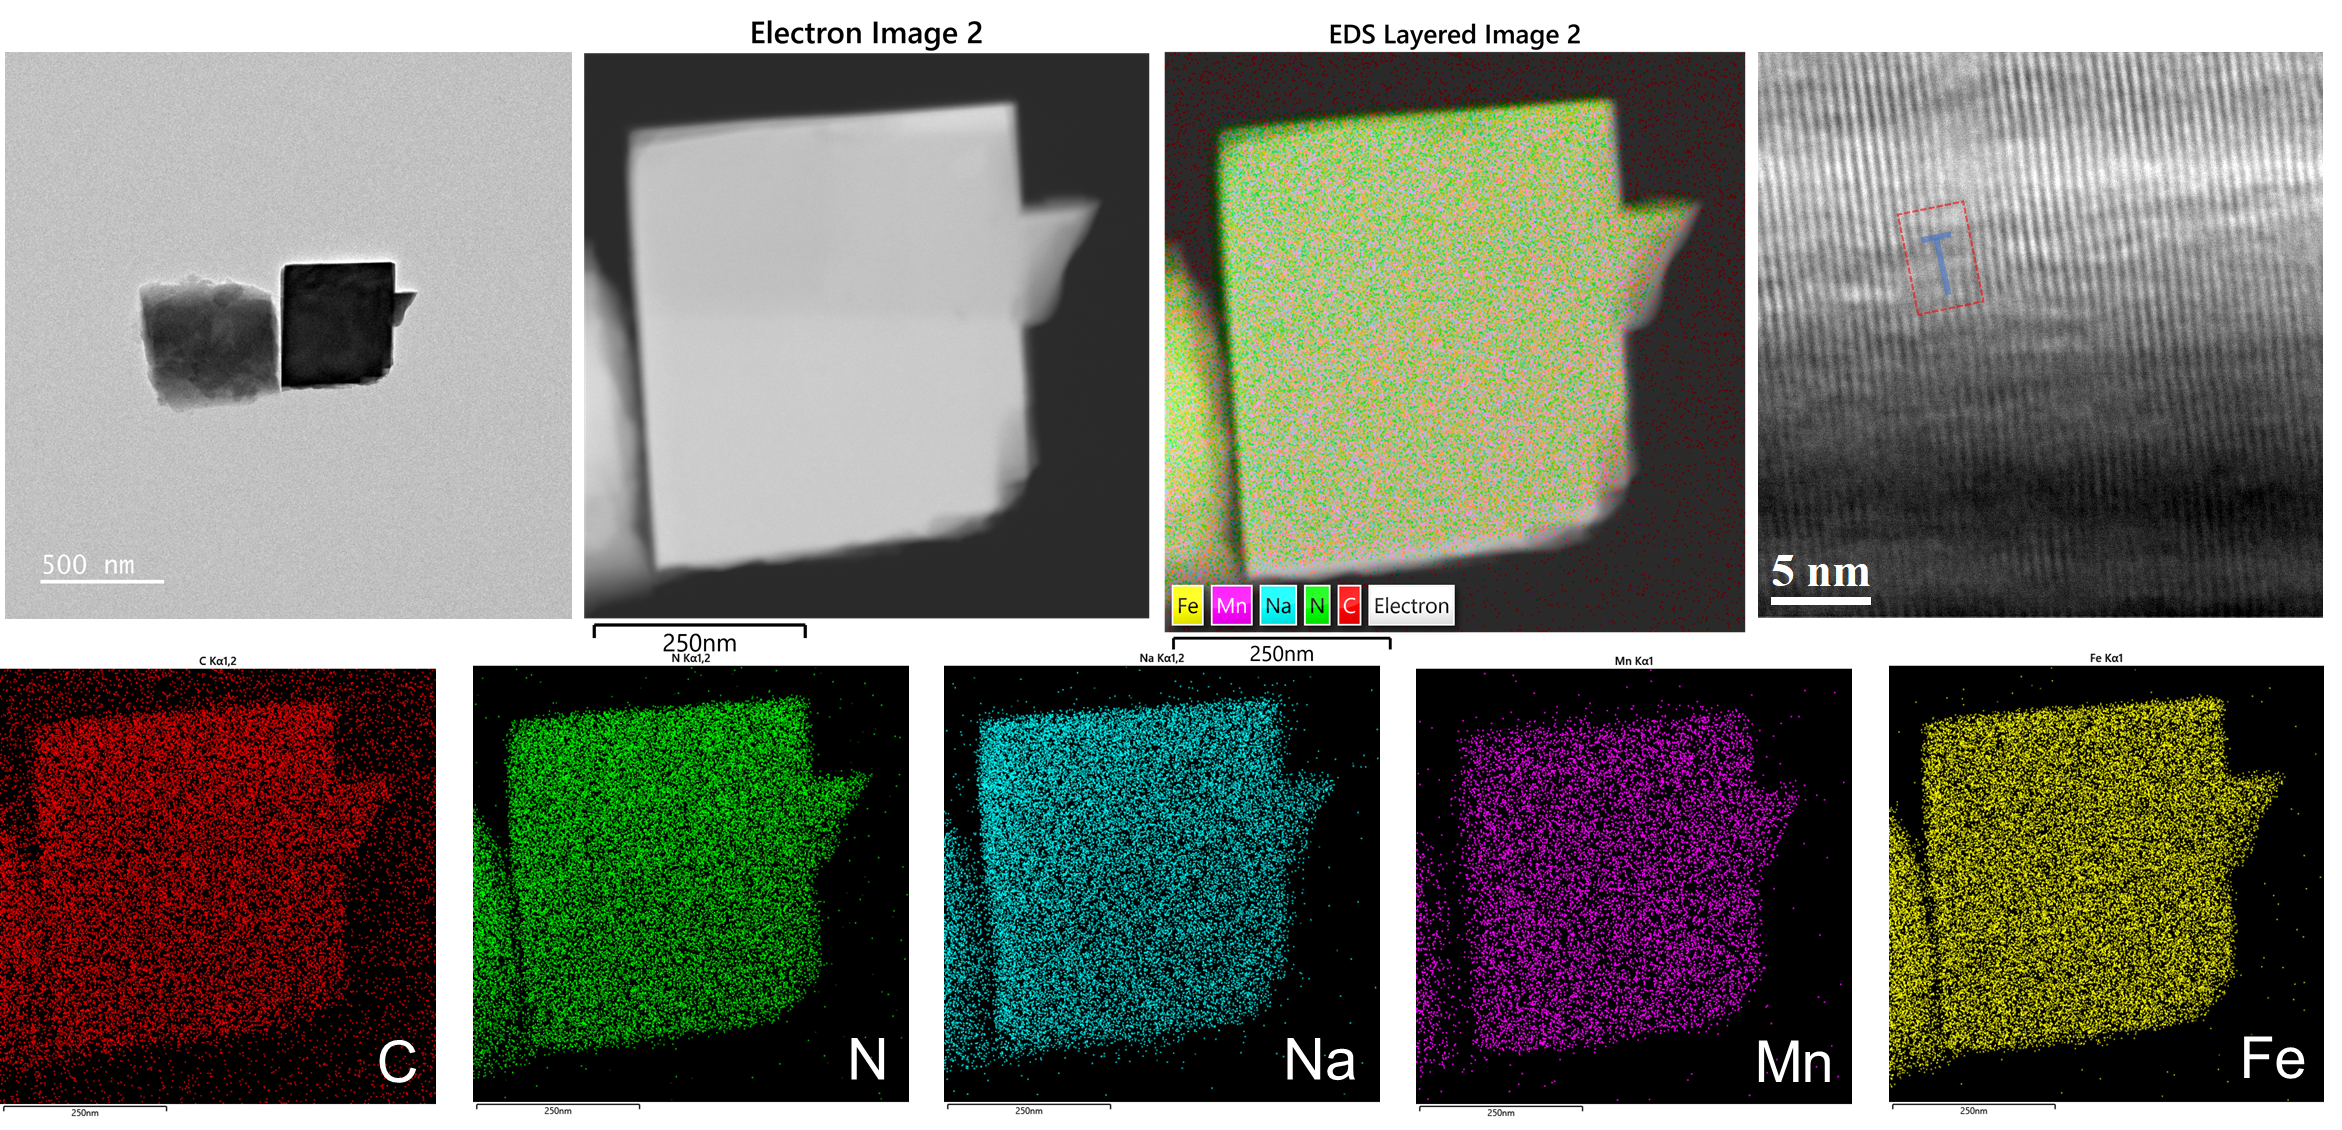


Fig.S2 TEM images of M2-PBA


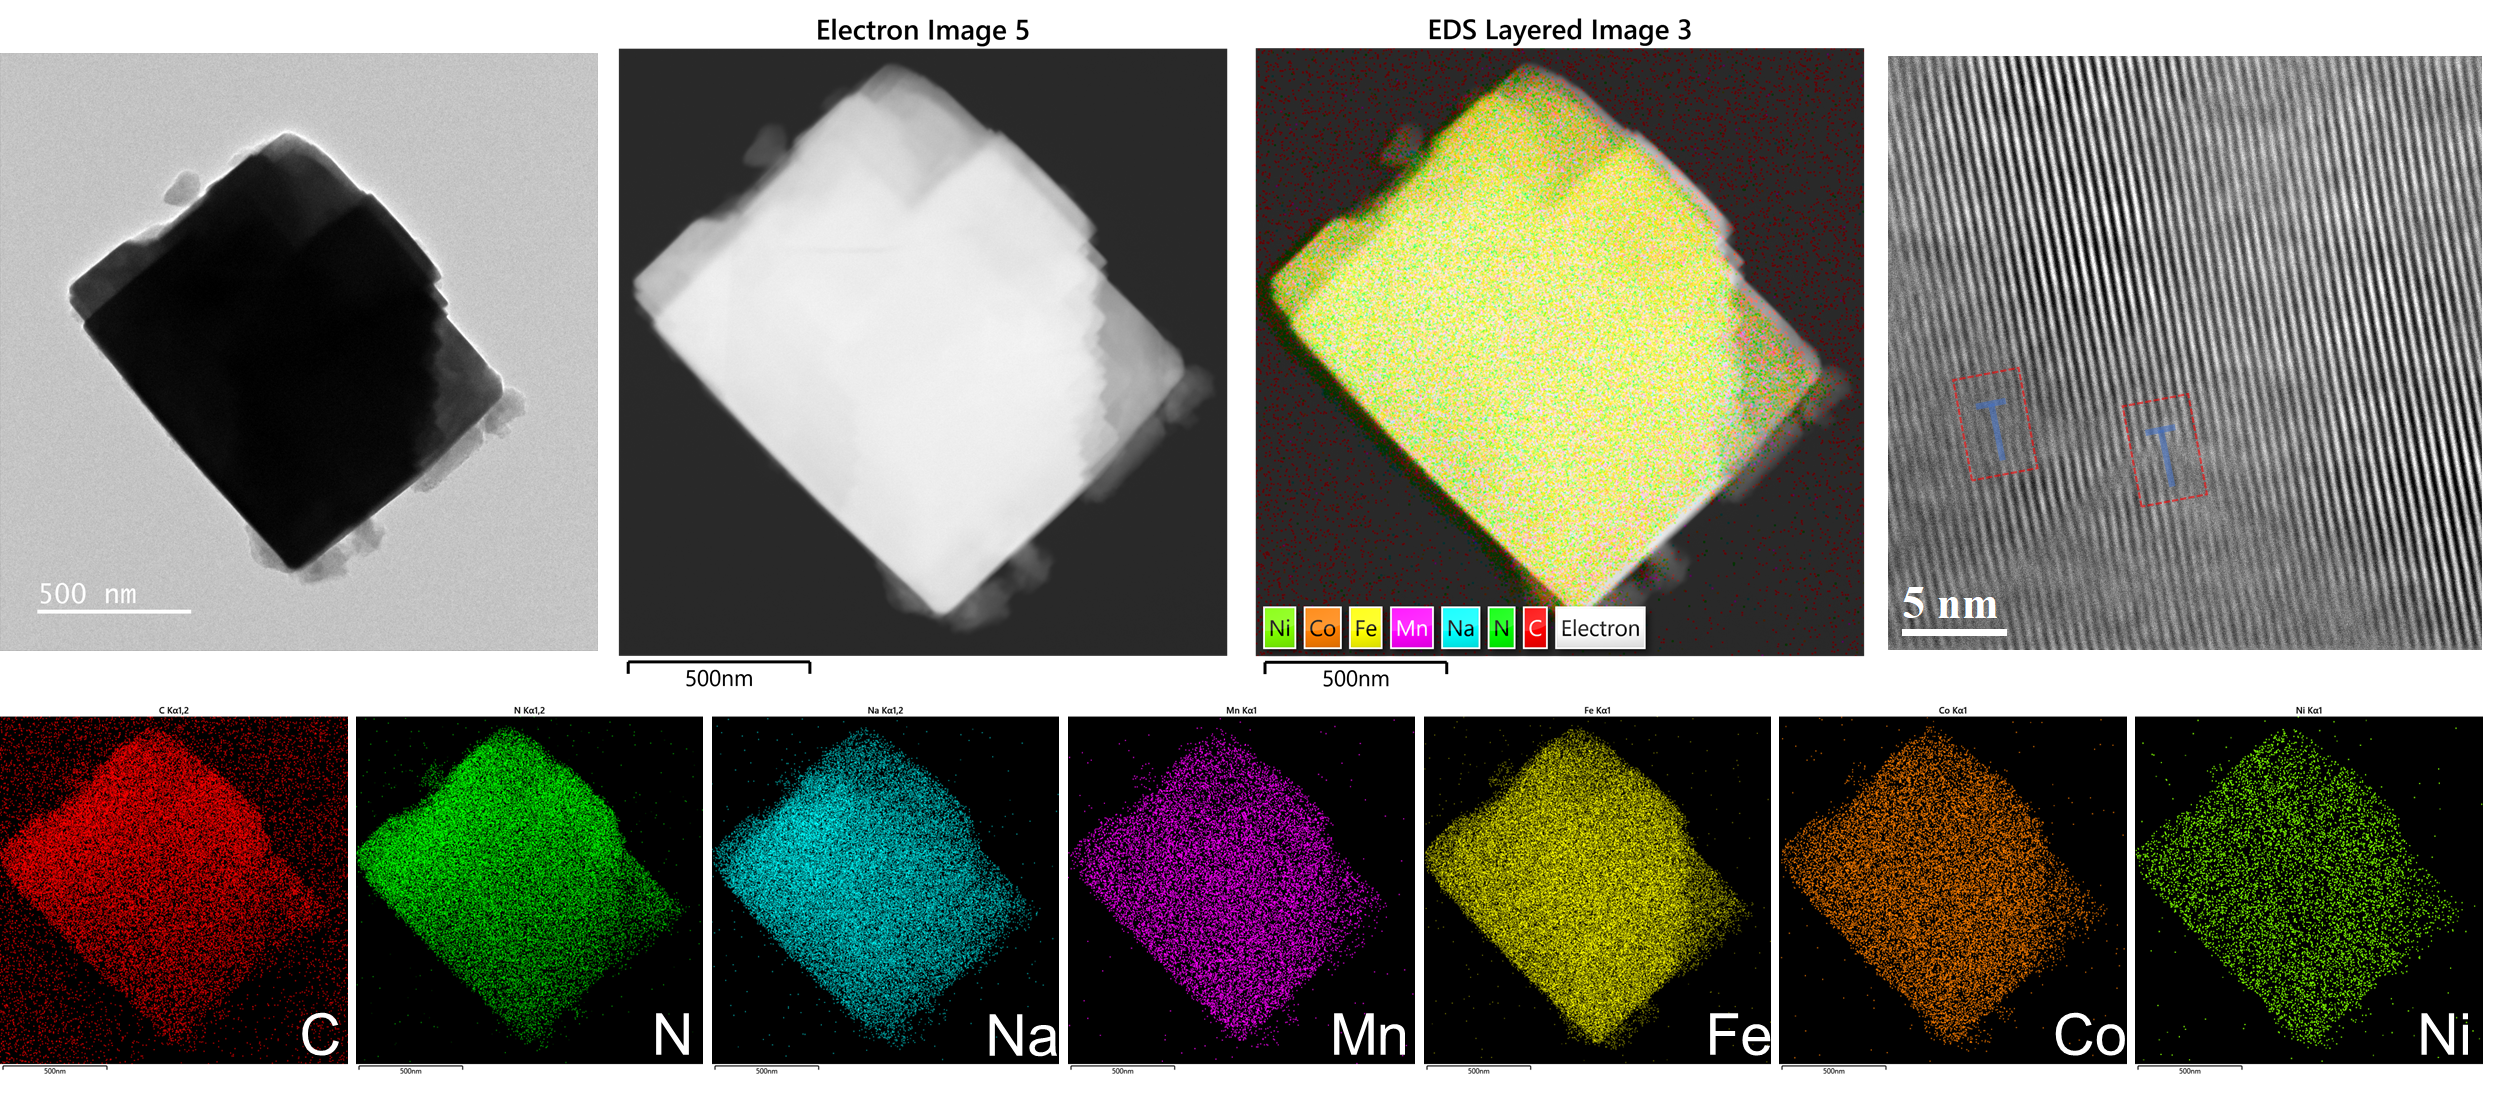


Fig.S3 TEM images of M4-PBA


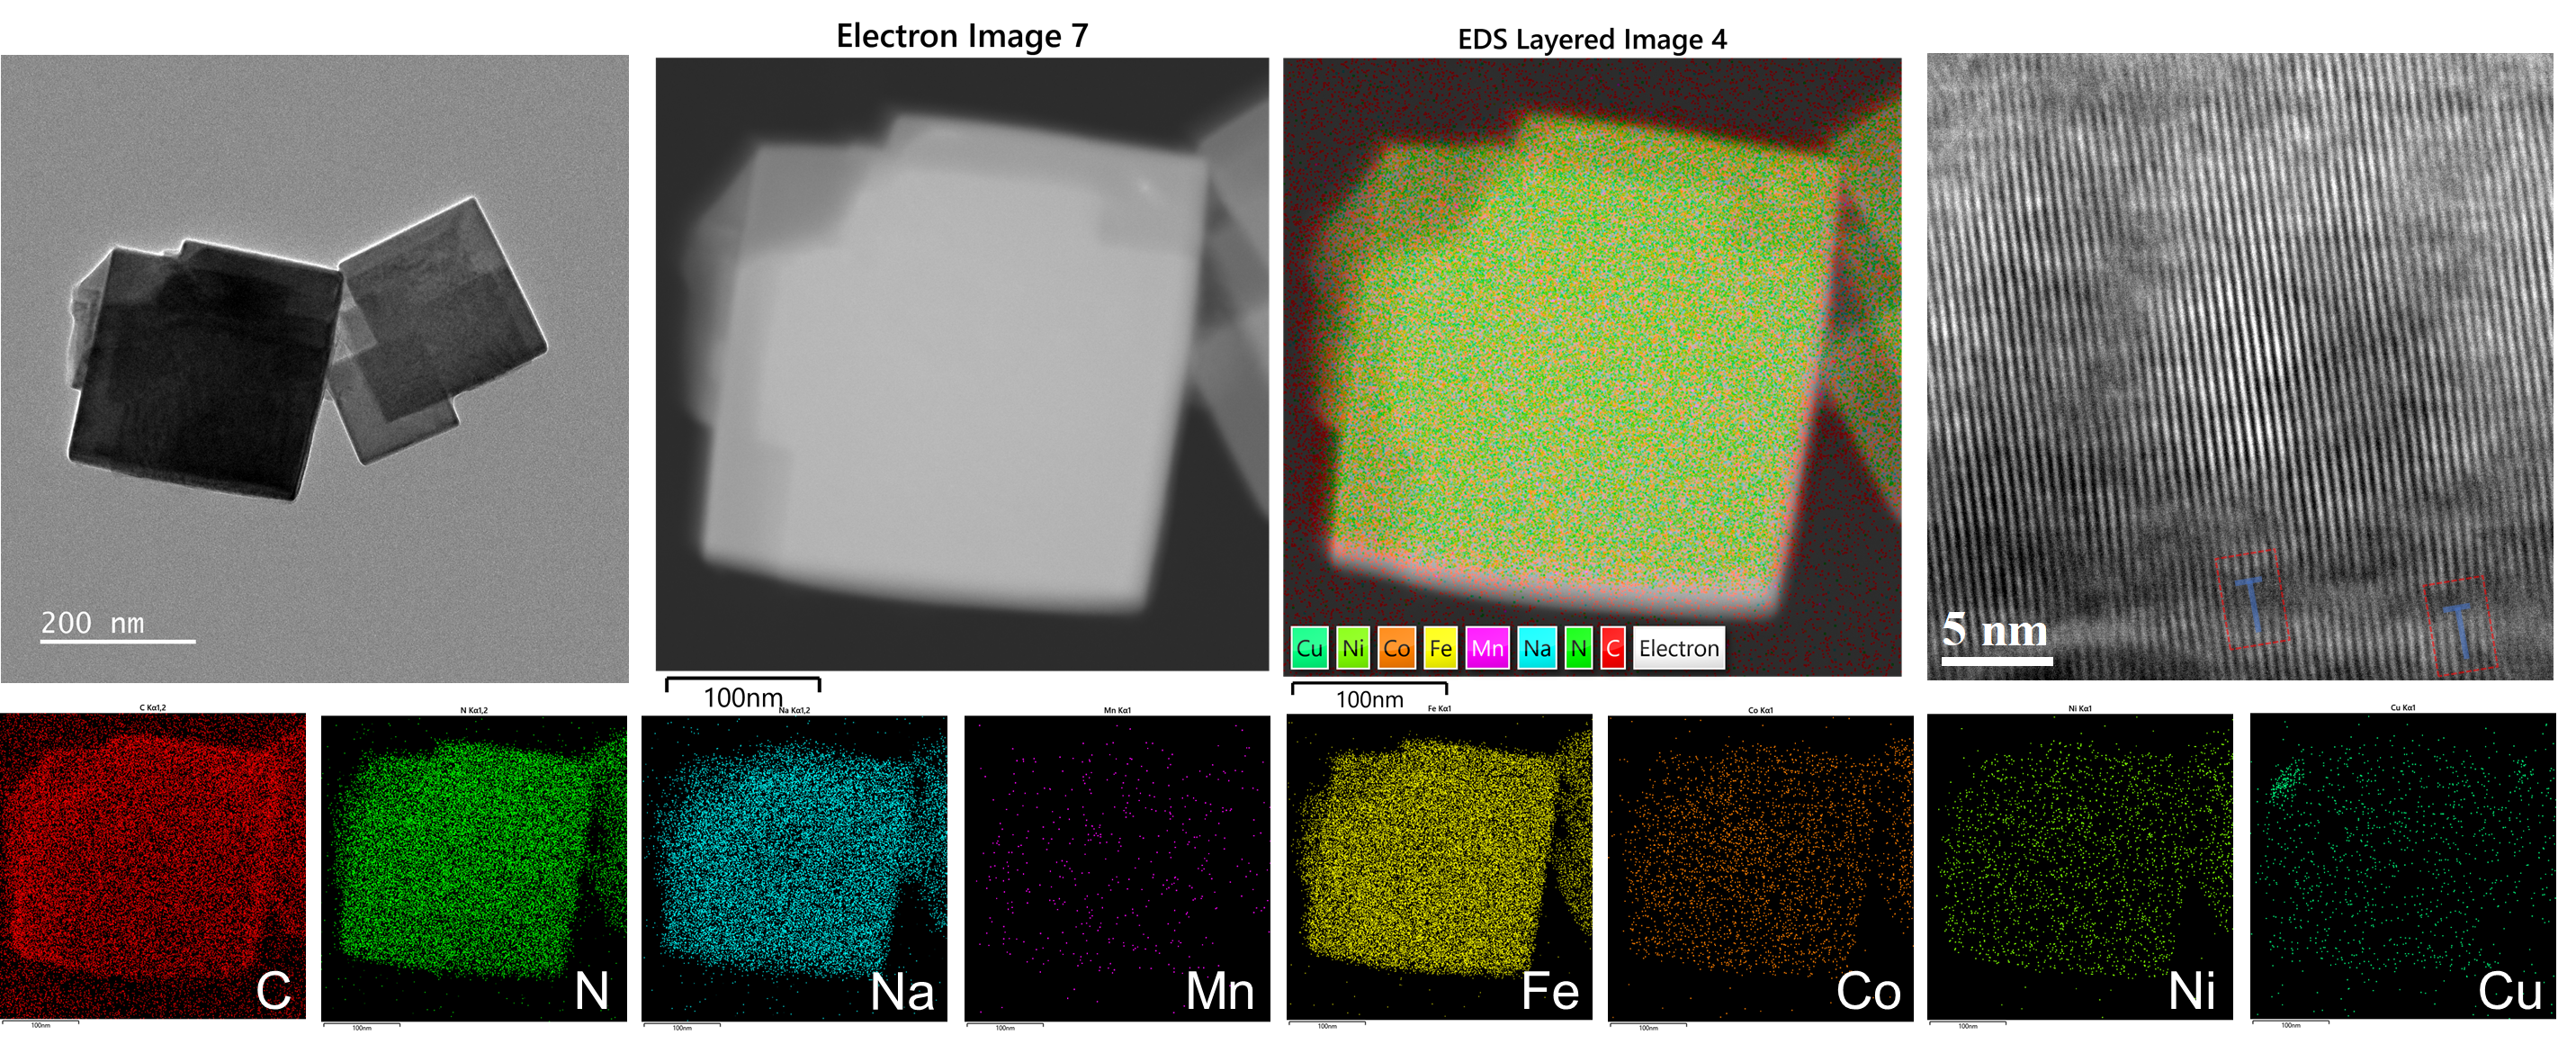


Fig.S4 TEM images of M5-PBA


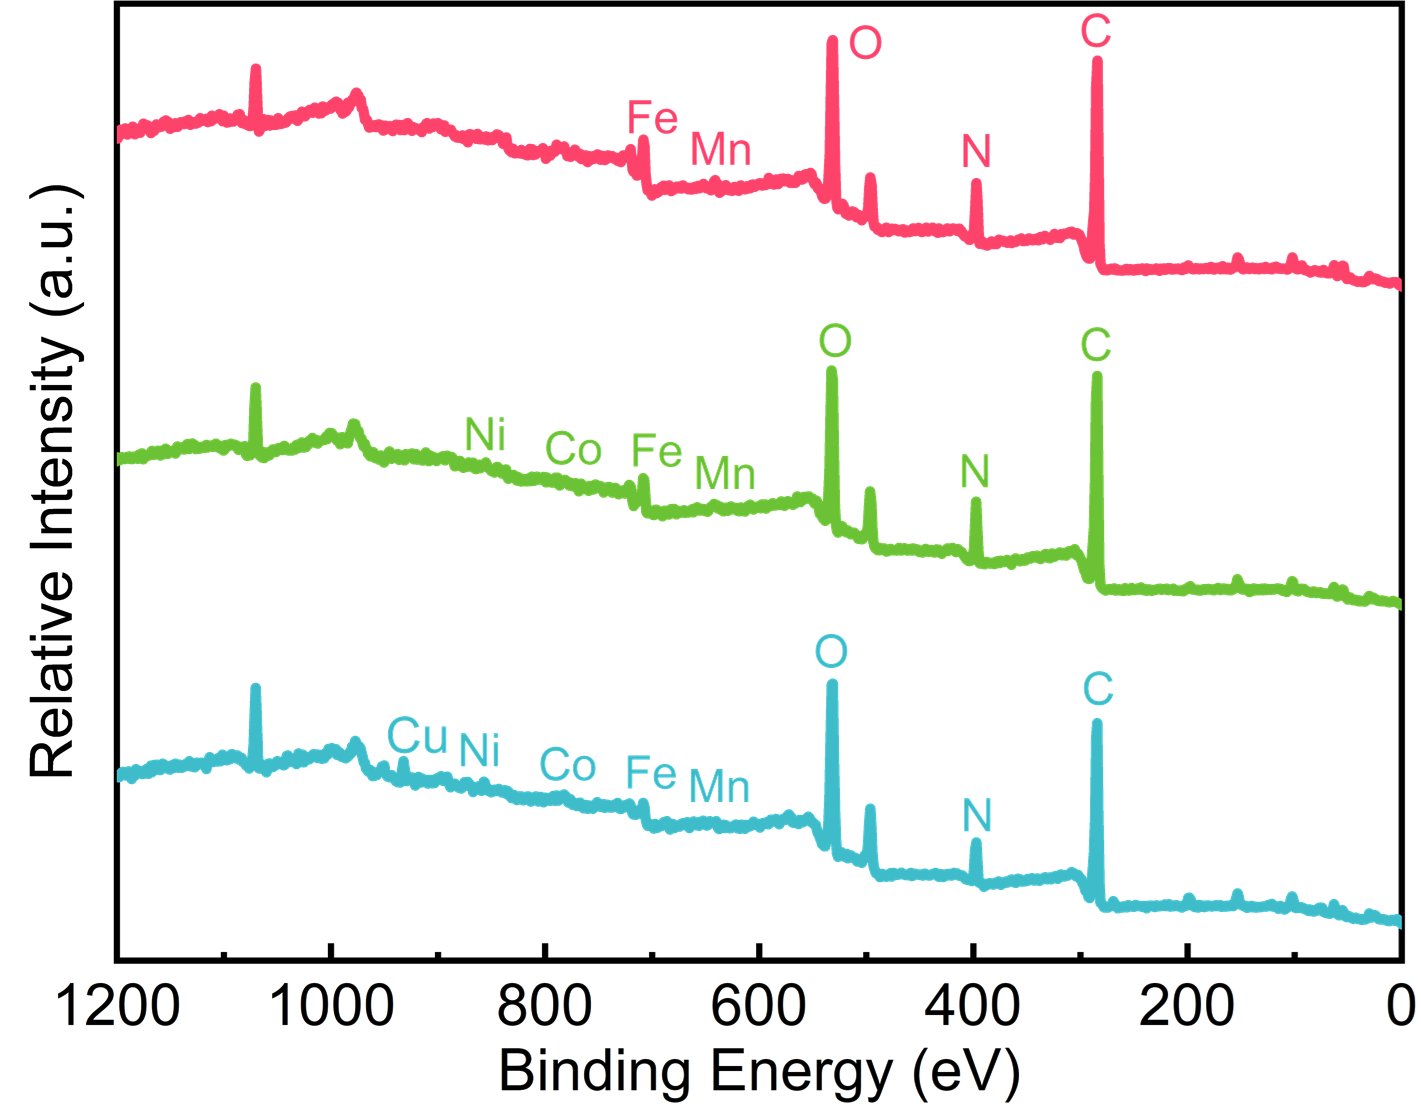


Fig.S5 XPS full spectrum of the three samples with M2-PBA in red, M4-PBA in green, M5-PBA in blue.


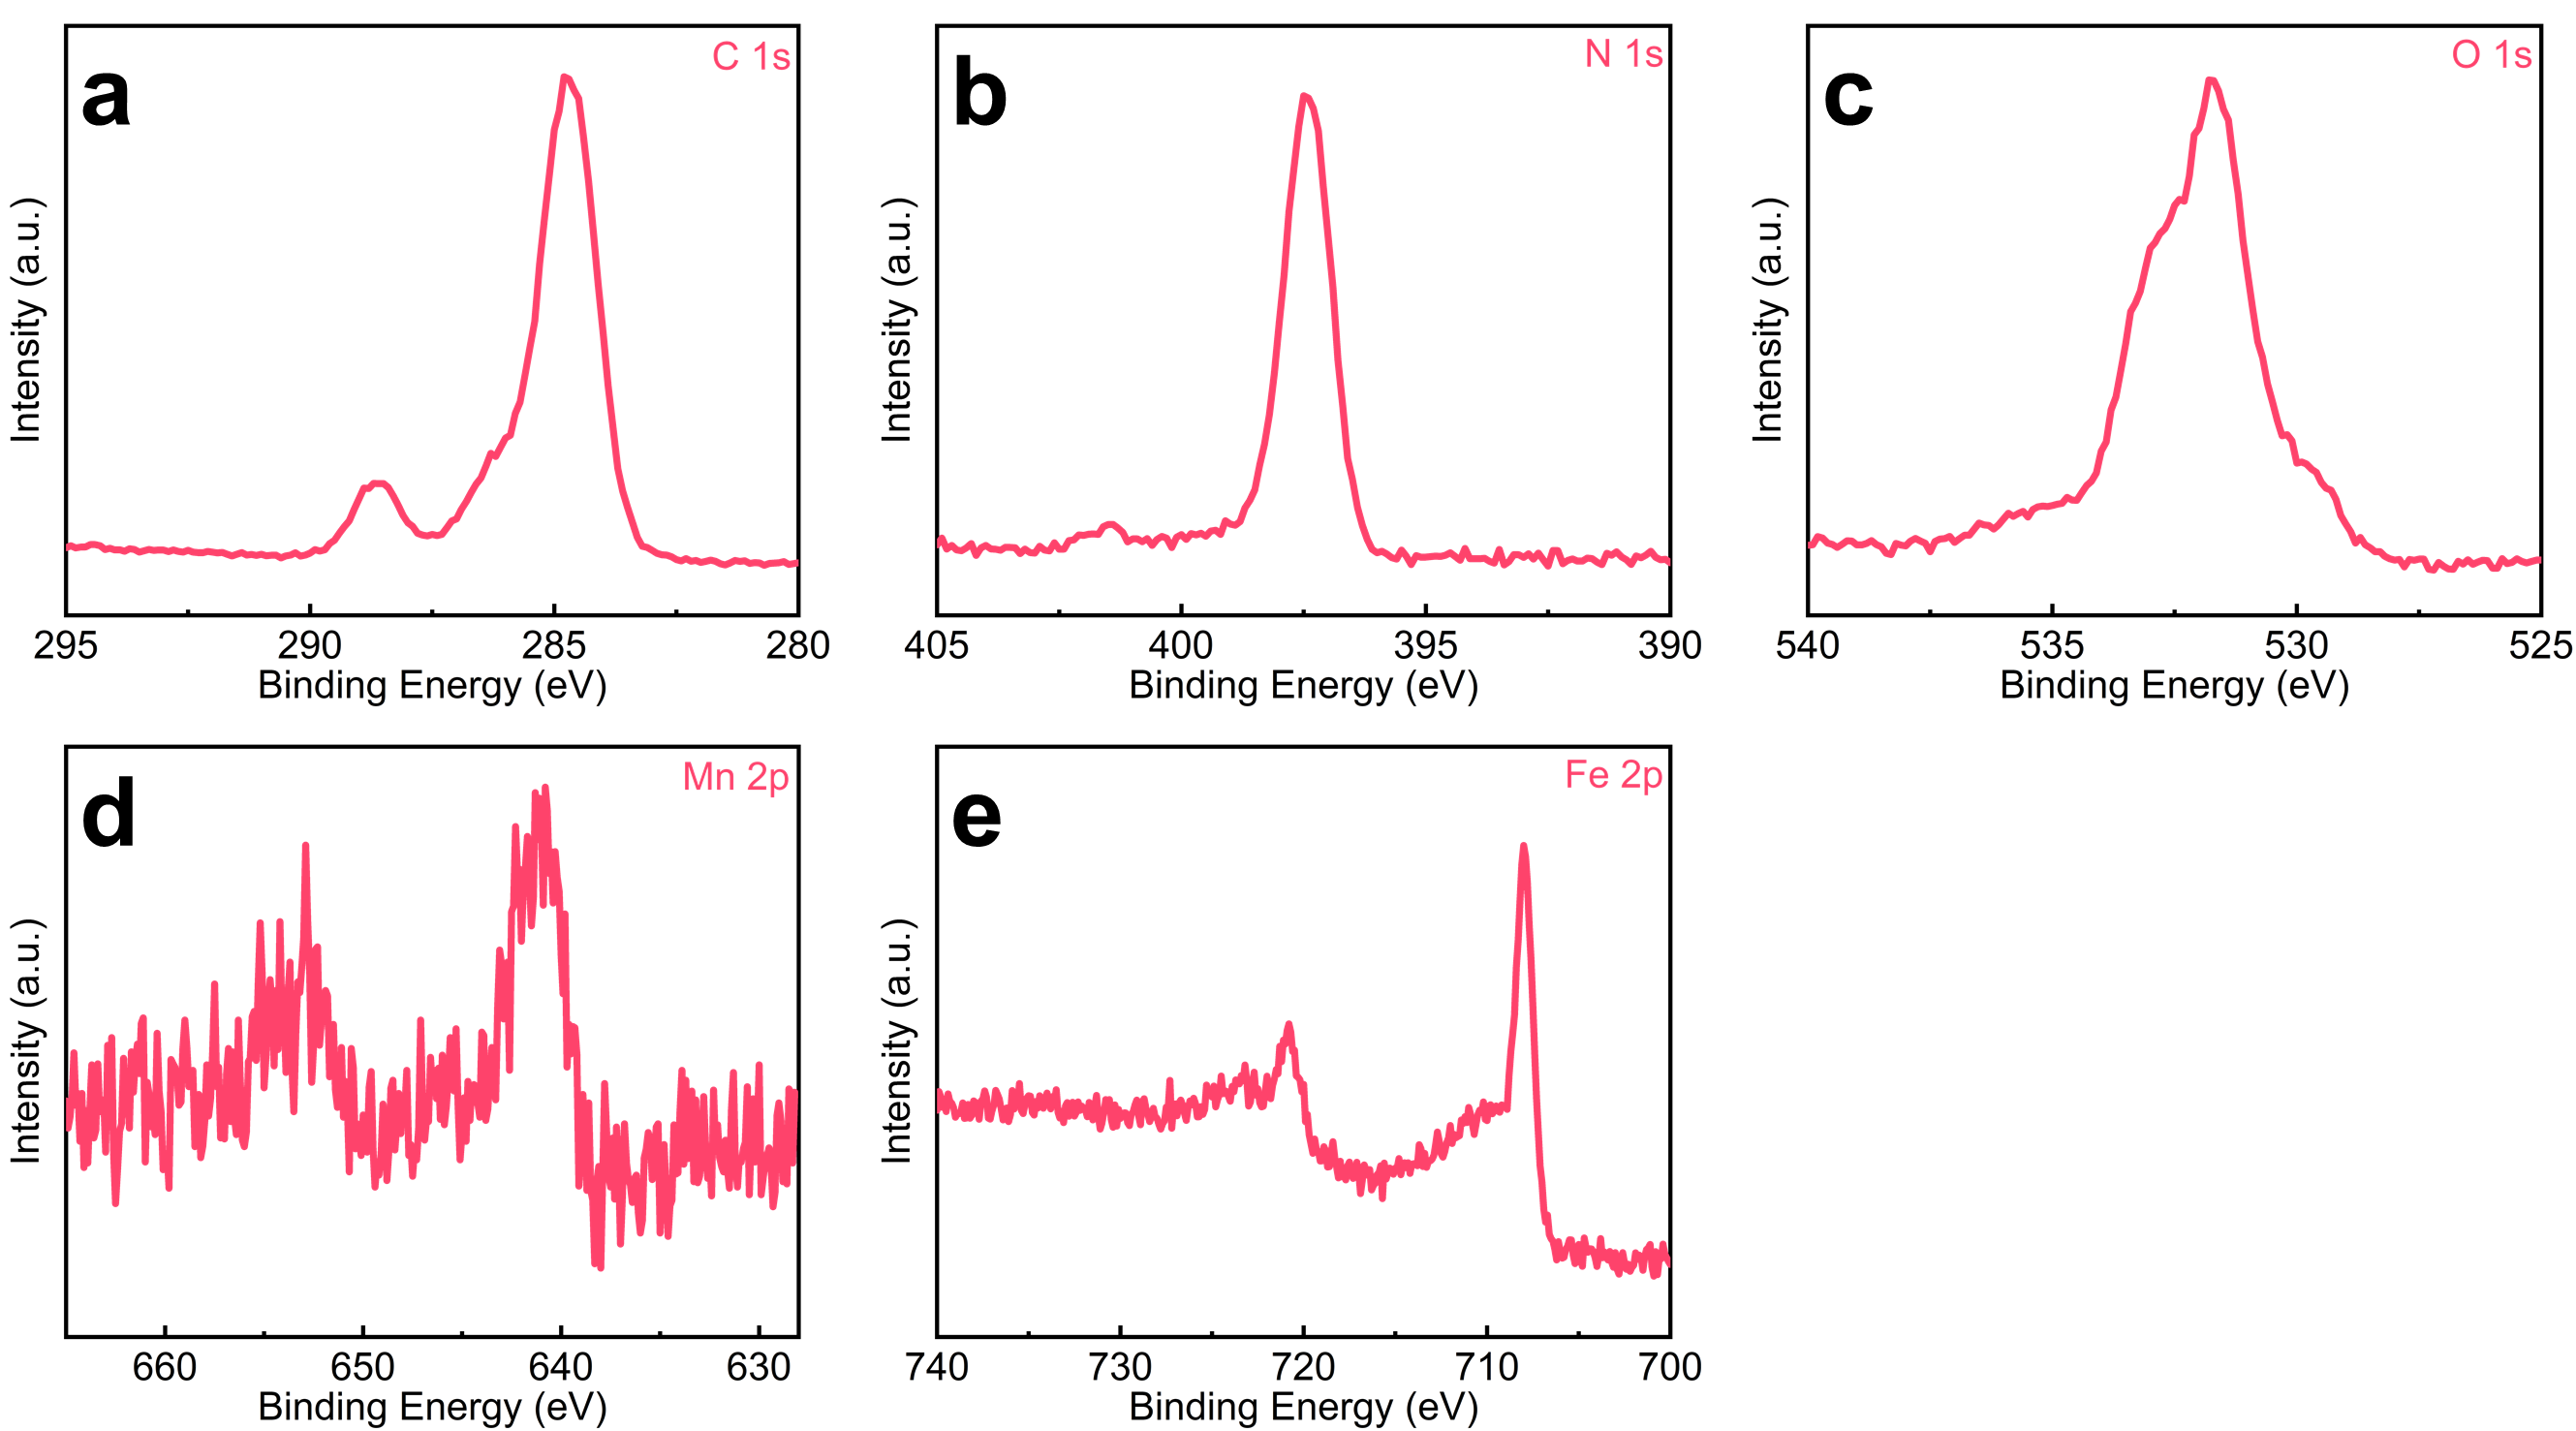


Fig.S6 XPS fine spectrum of M2-PBA. **a** C 1s, **b** N 1s, **c** O 1s, **d** Mn 2p, and **e** Fe 2p.


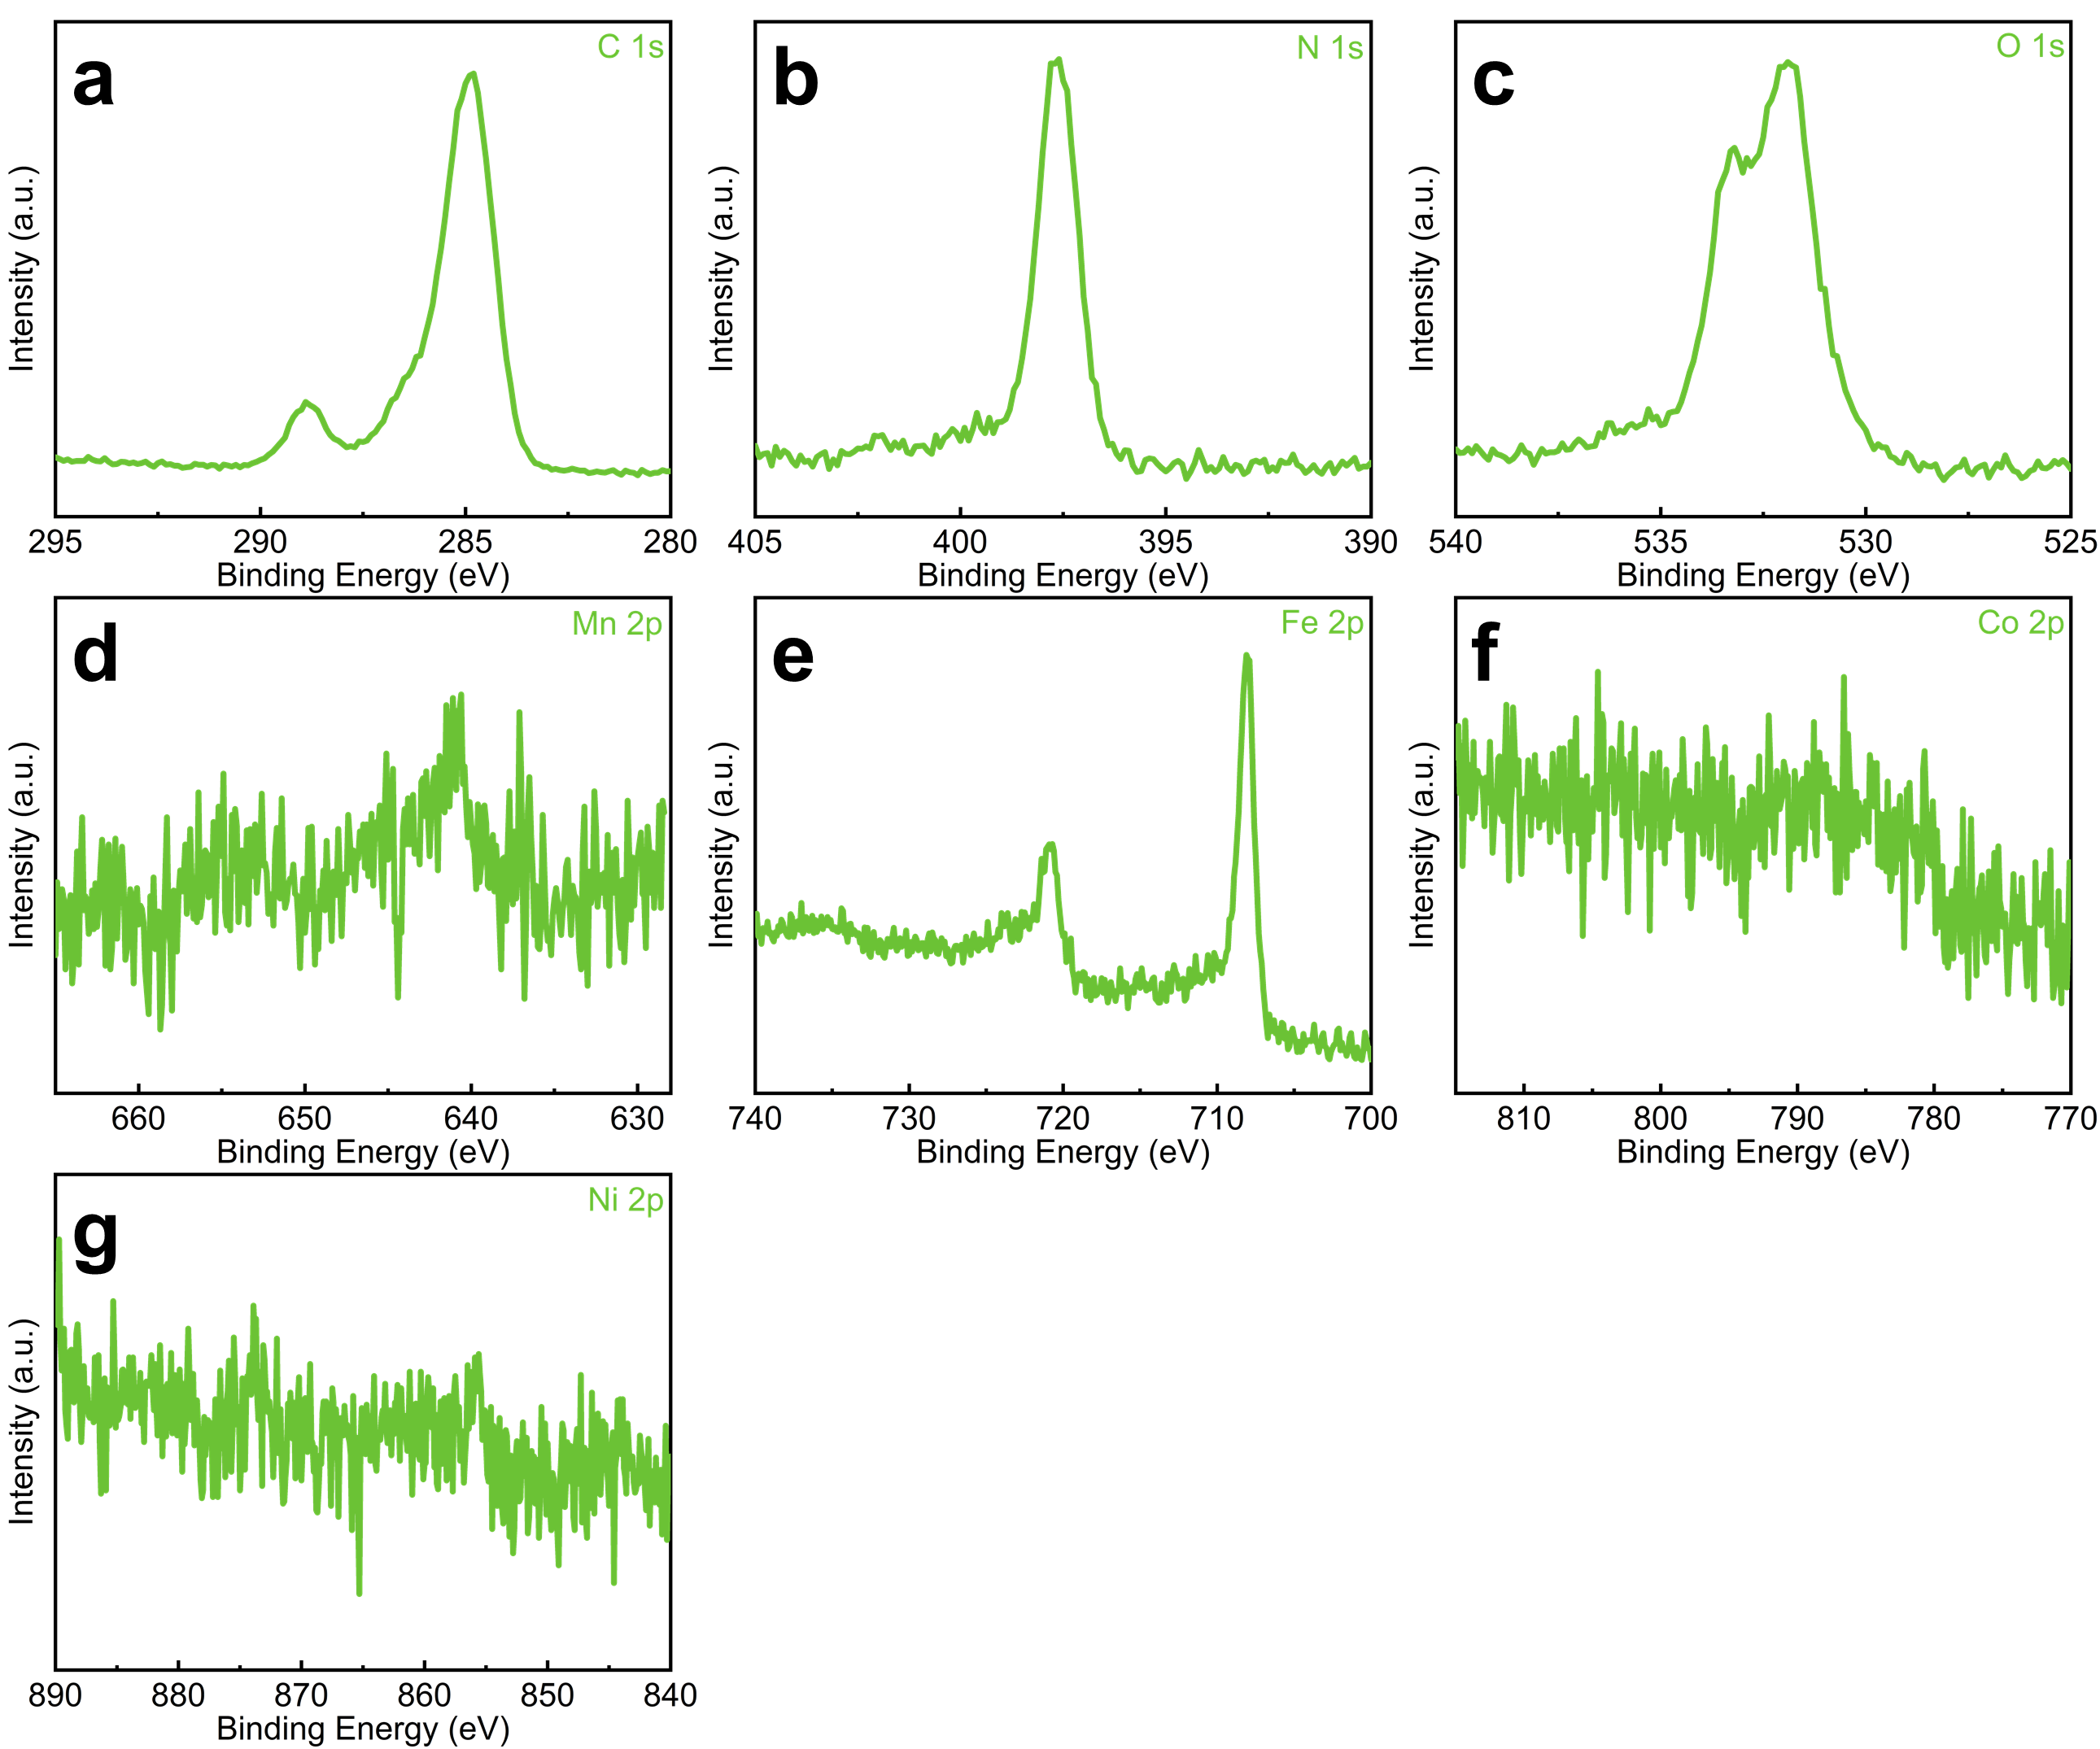


Fig.S7 XPS fine spectrum of M4-PBA. **a** C 1s, **b** N 1s, **c** O 1s, **d** Mn 2p, **e** Fe 2p, **f** Co 2p, and **g** Ni 2p.


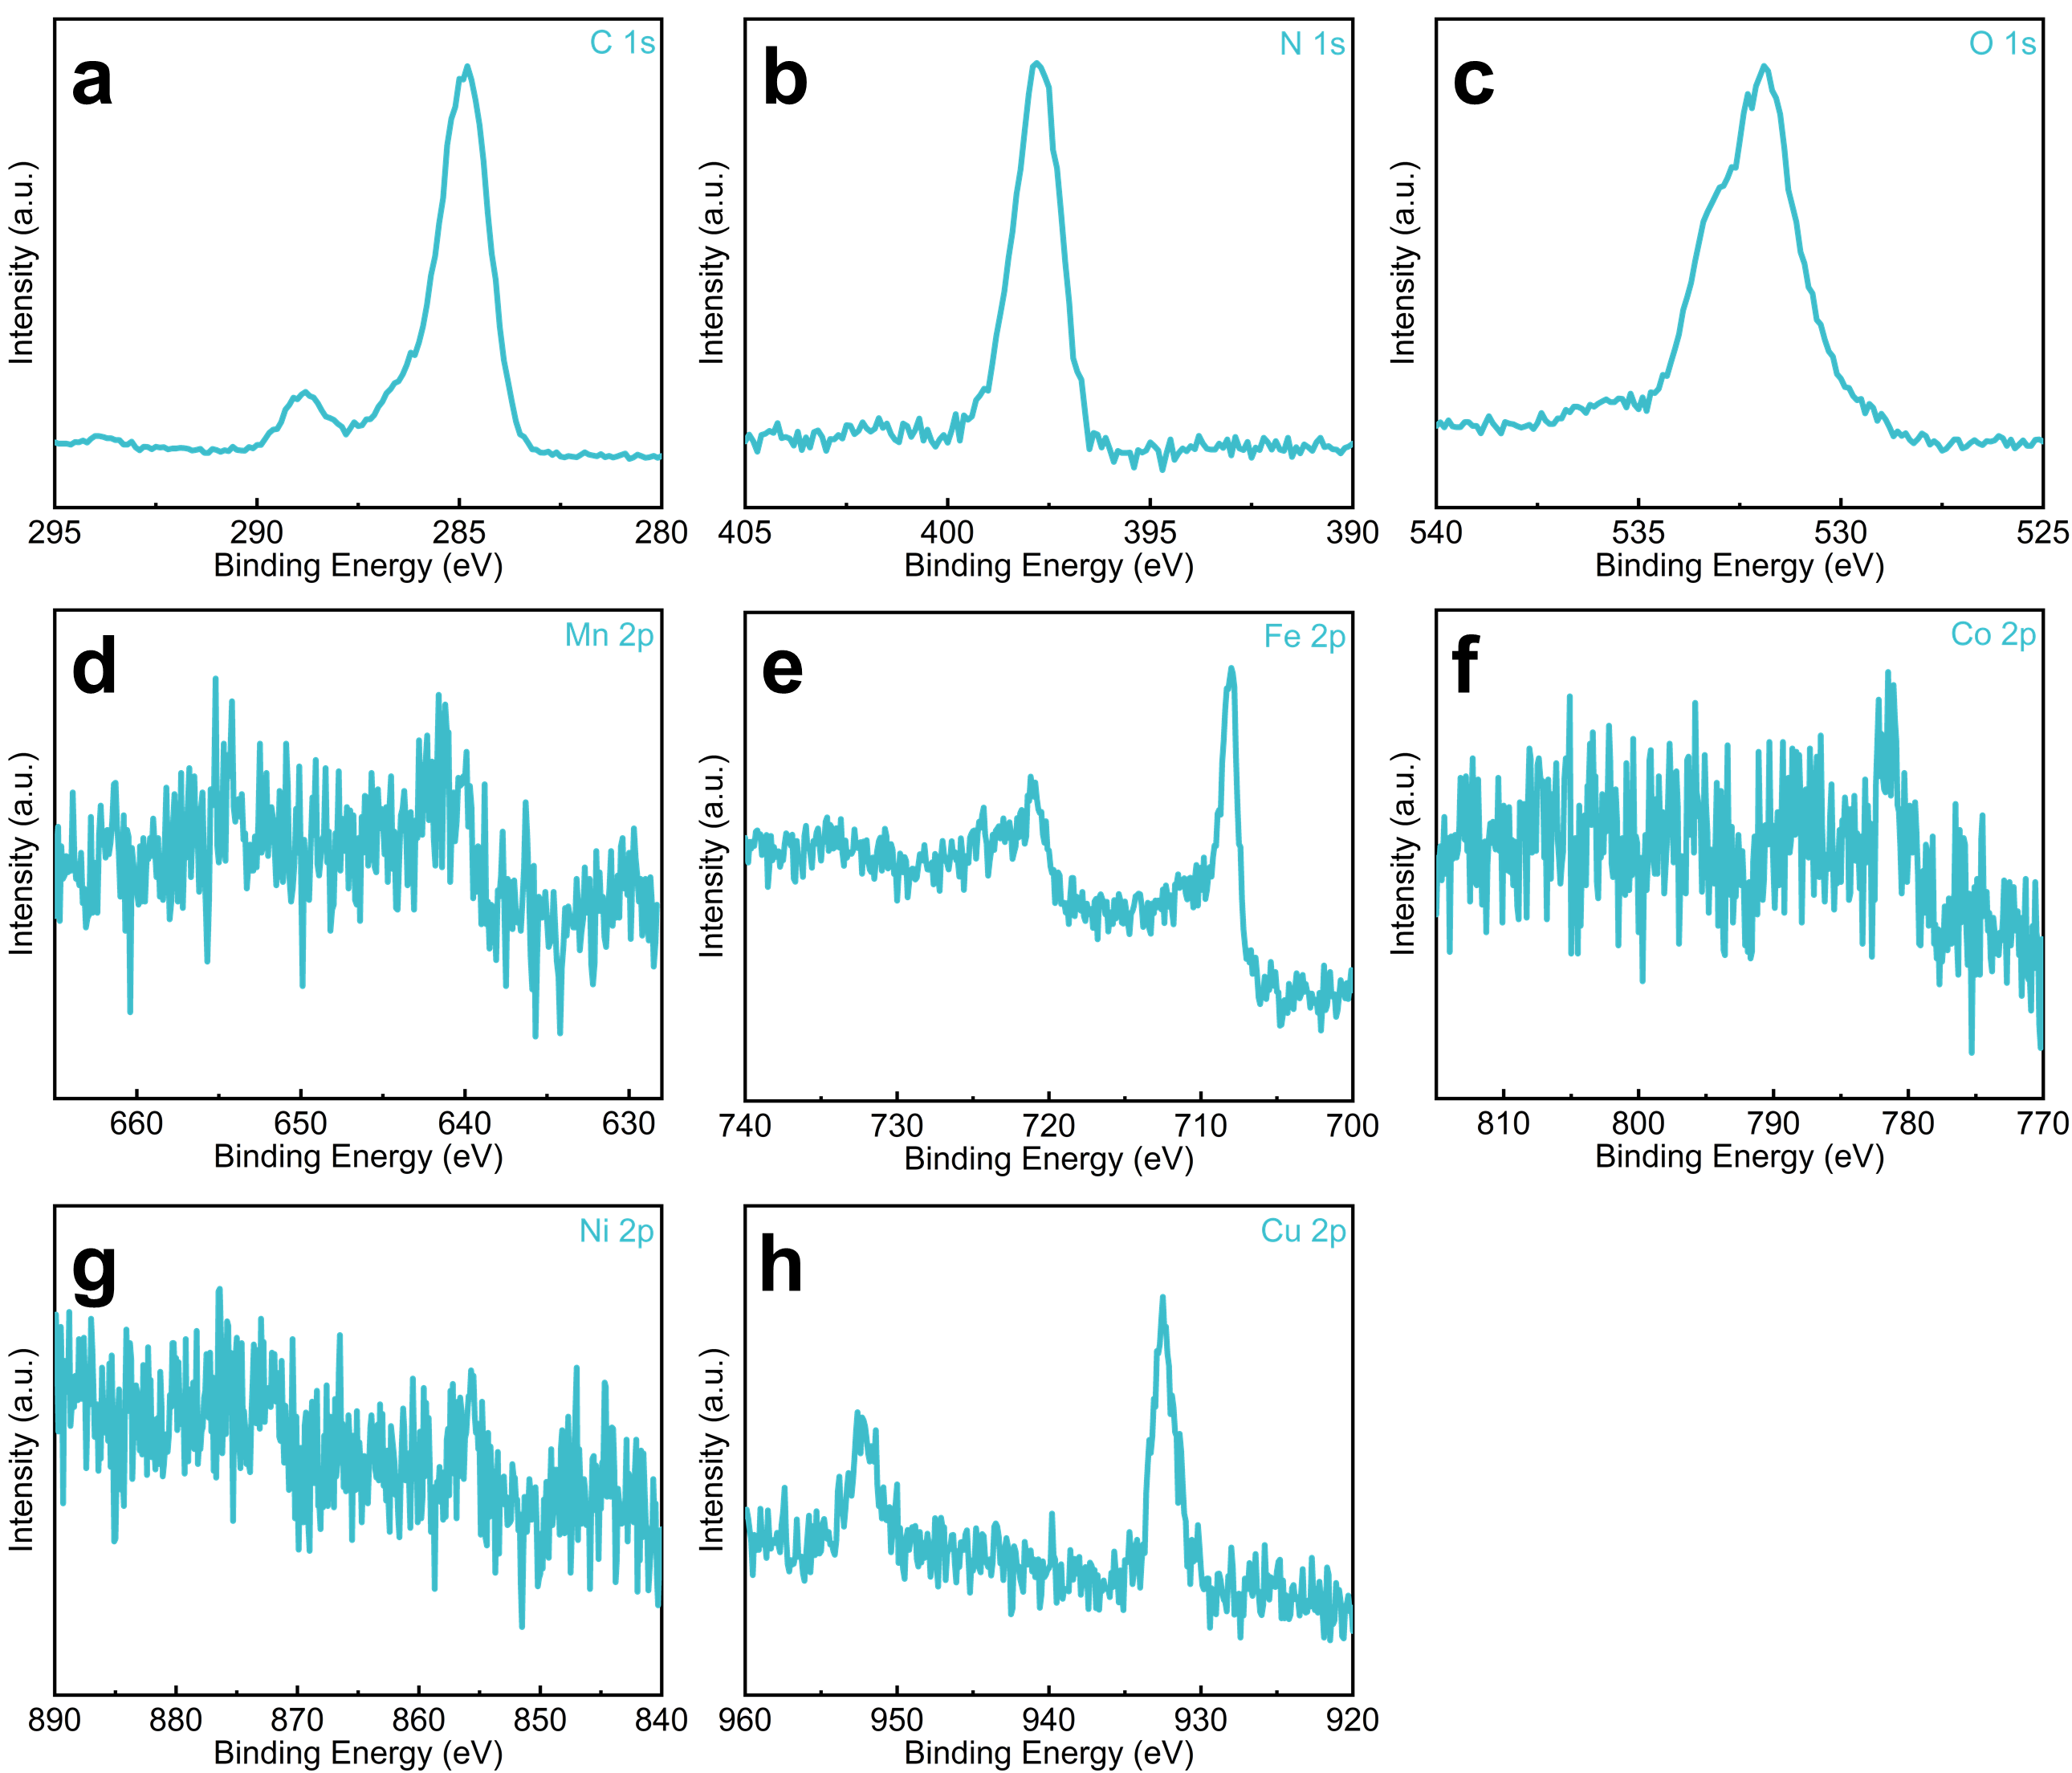


Fig.S8 XPS fine spectrum of M5-PBA. **a** C 1s, **b** N 1s, **c** O 1s, **d** Mn 2p, **e** Fe 2p, **f** Co 2p, **g** Ni 2p, and **h** Cu 2p.


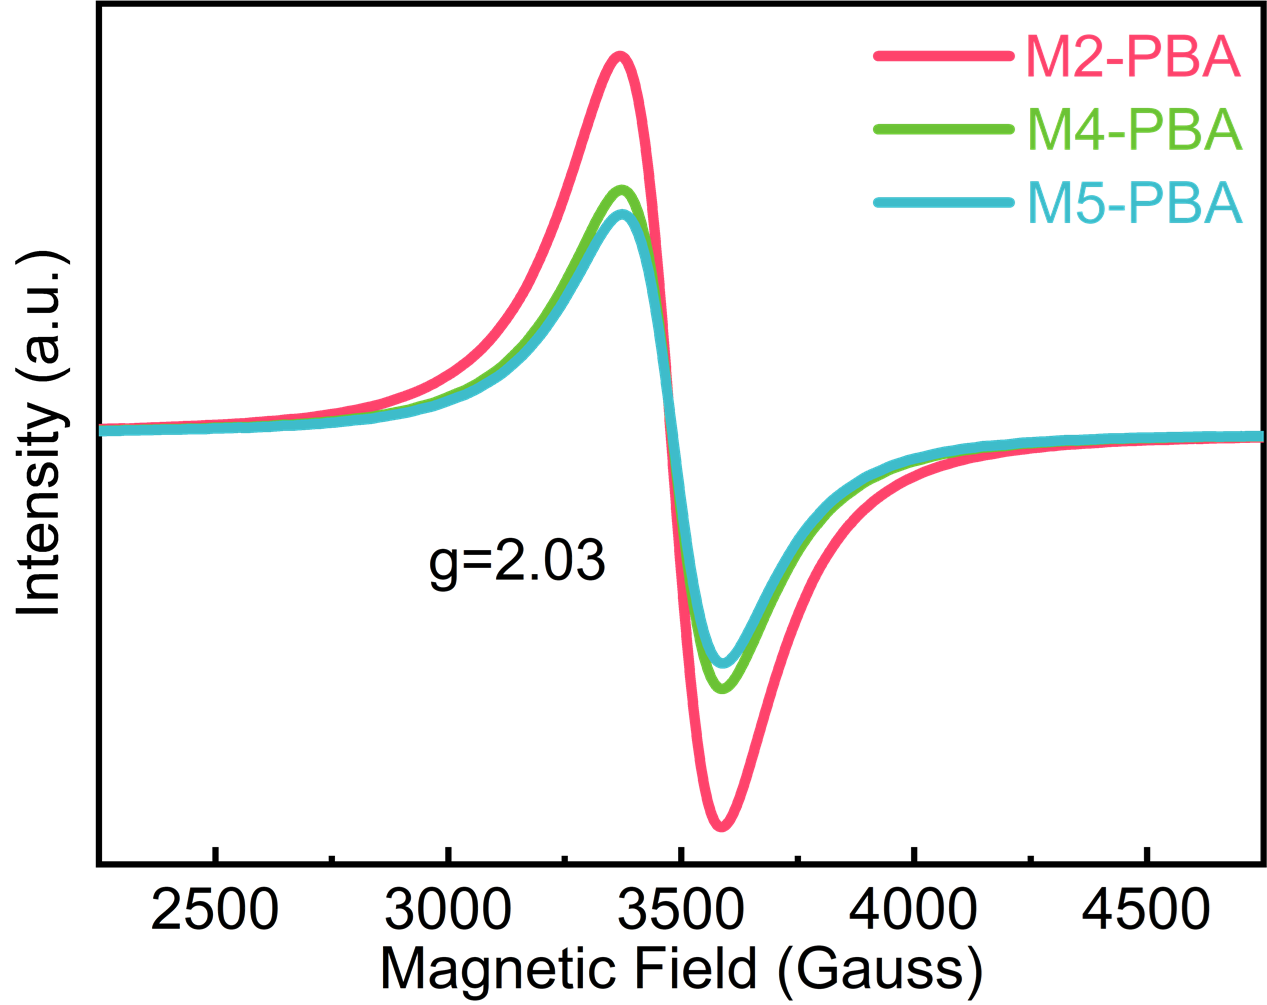


Fig.S9 EPR results of M2-PBA, M4-PBA and M5-PBA.


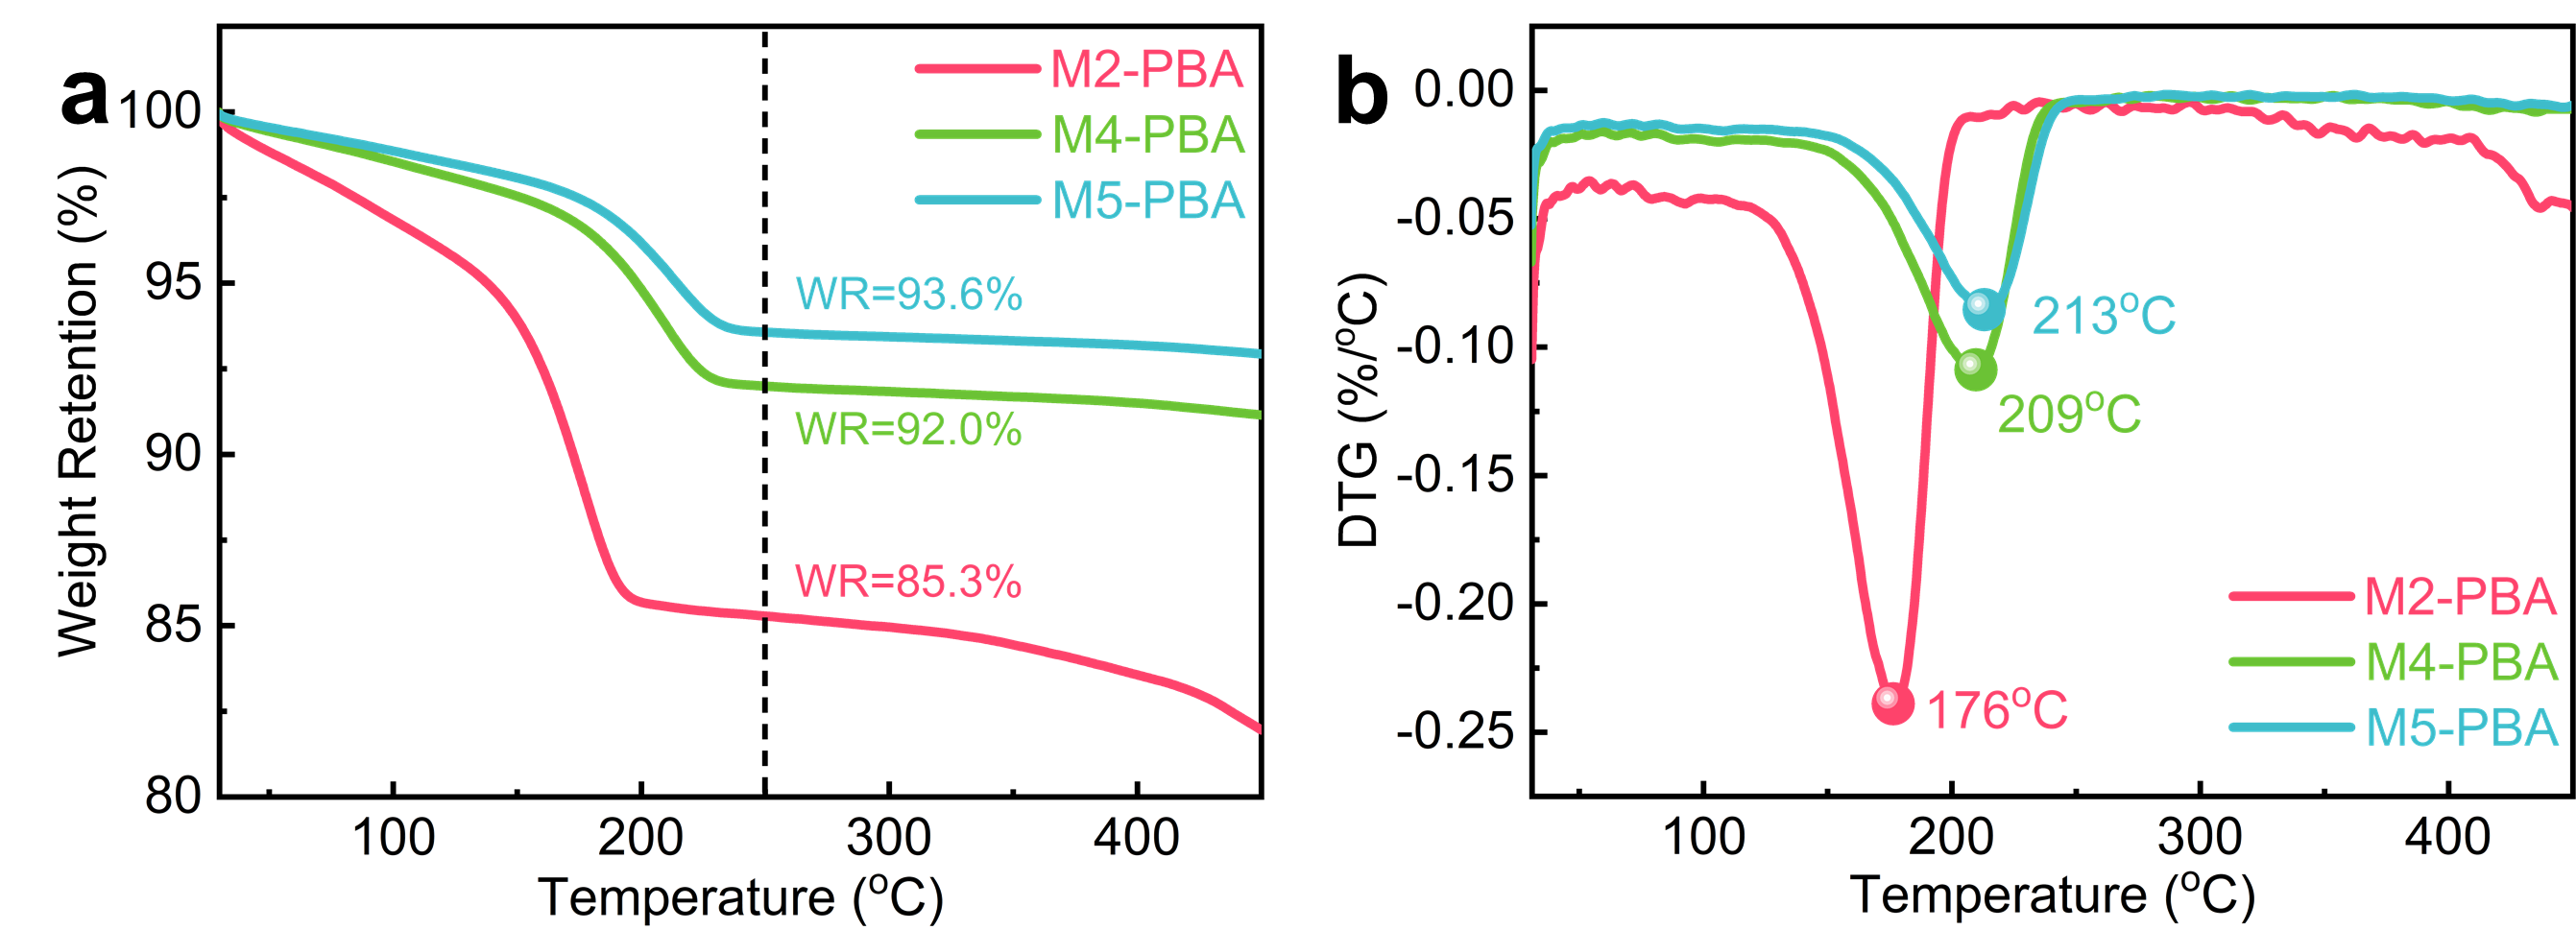


Fig.S10 **a** TG, **b** DSC curves of M2-PBA, M4-PBA and M5-PBA.


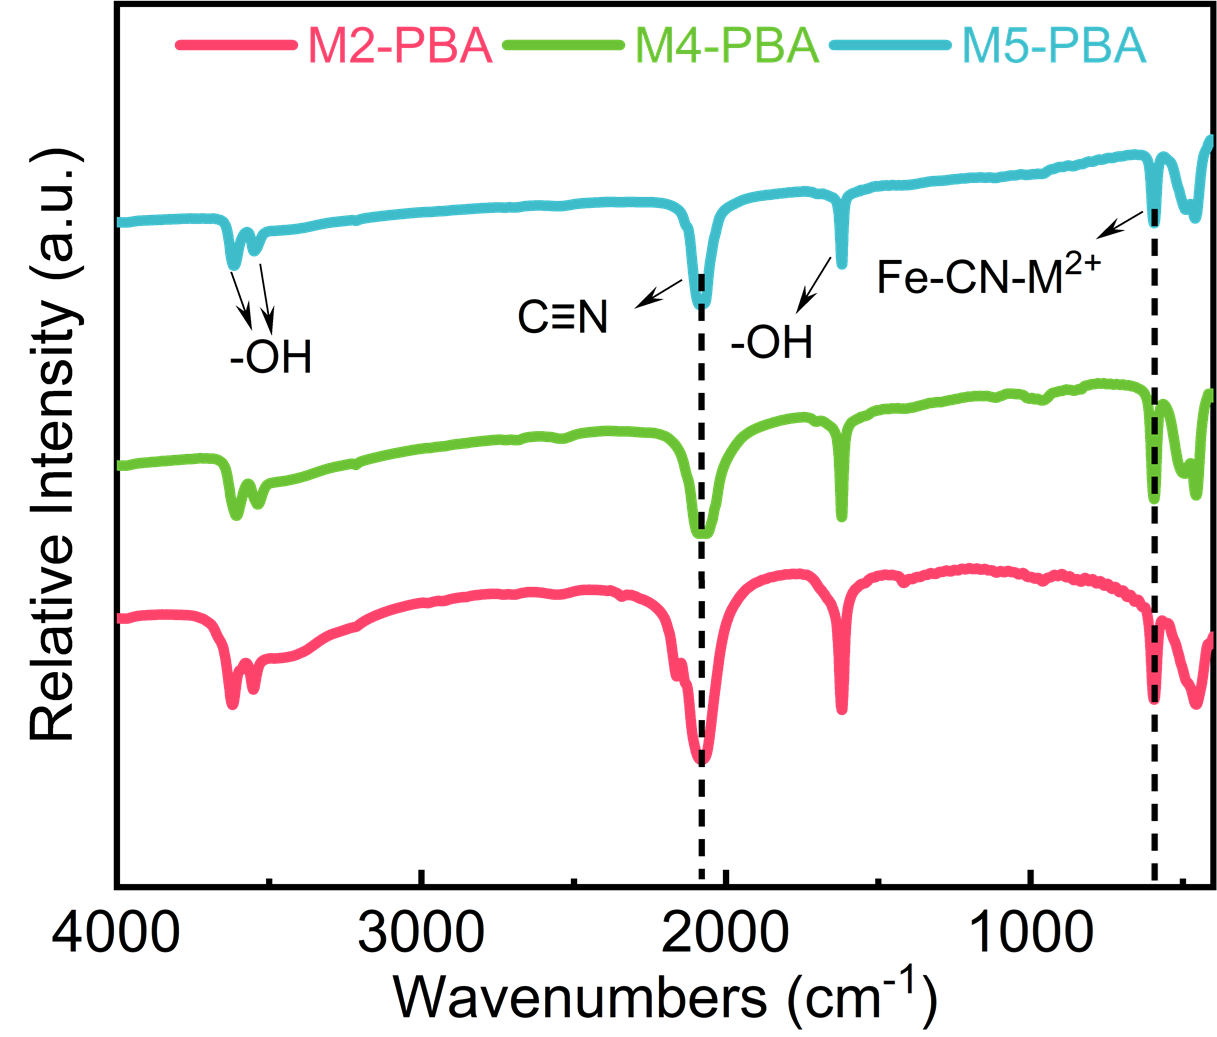


Fig.S11 FT-IR results of M2-PBA, M4-PBA and M5-PBA.


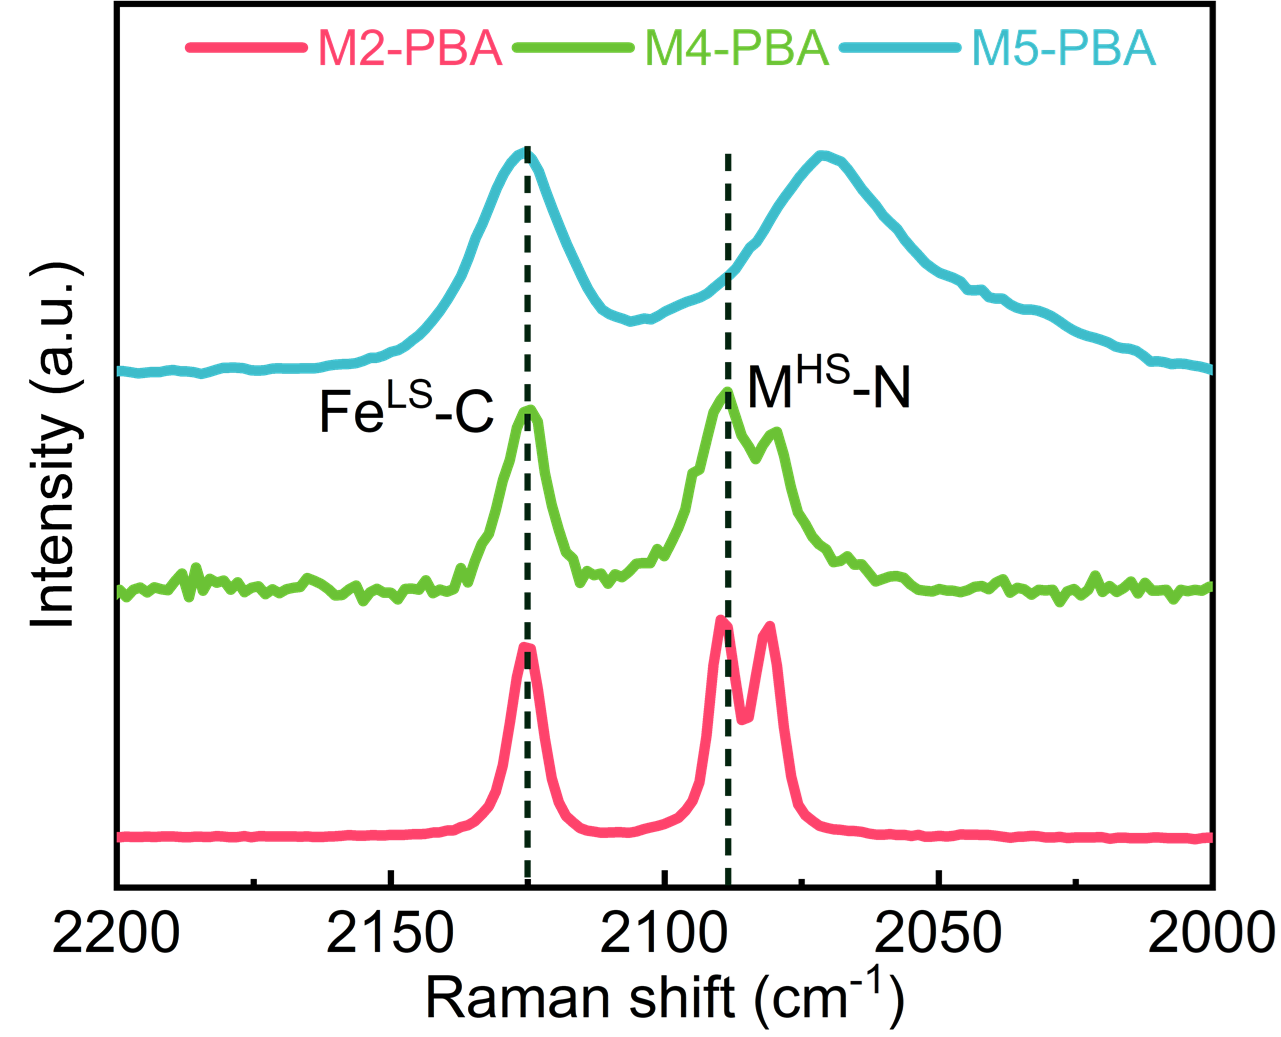


Fig.S12 Raman spectra of M2-PBA, M4-PBA and M5-PBA.


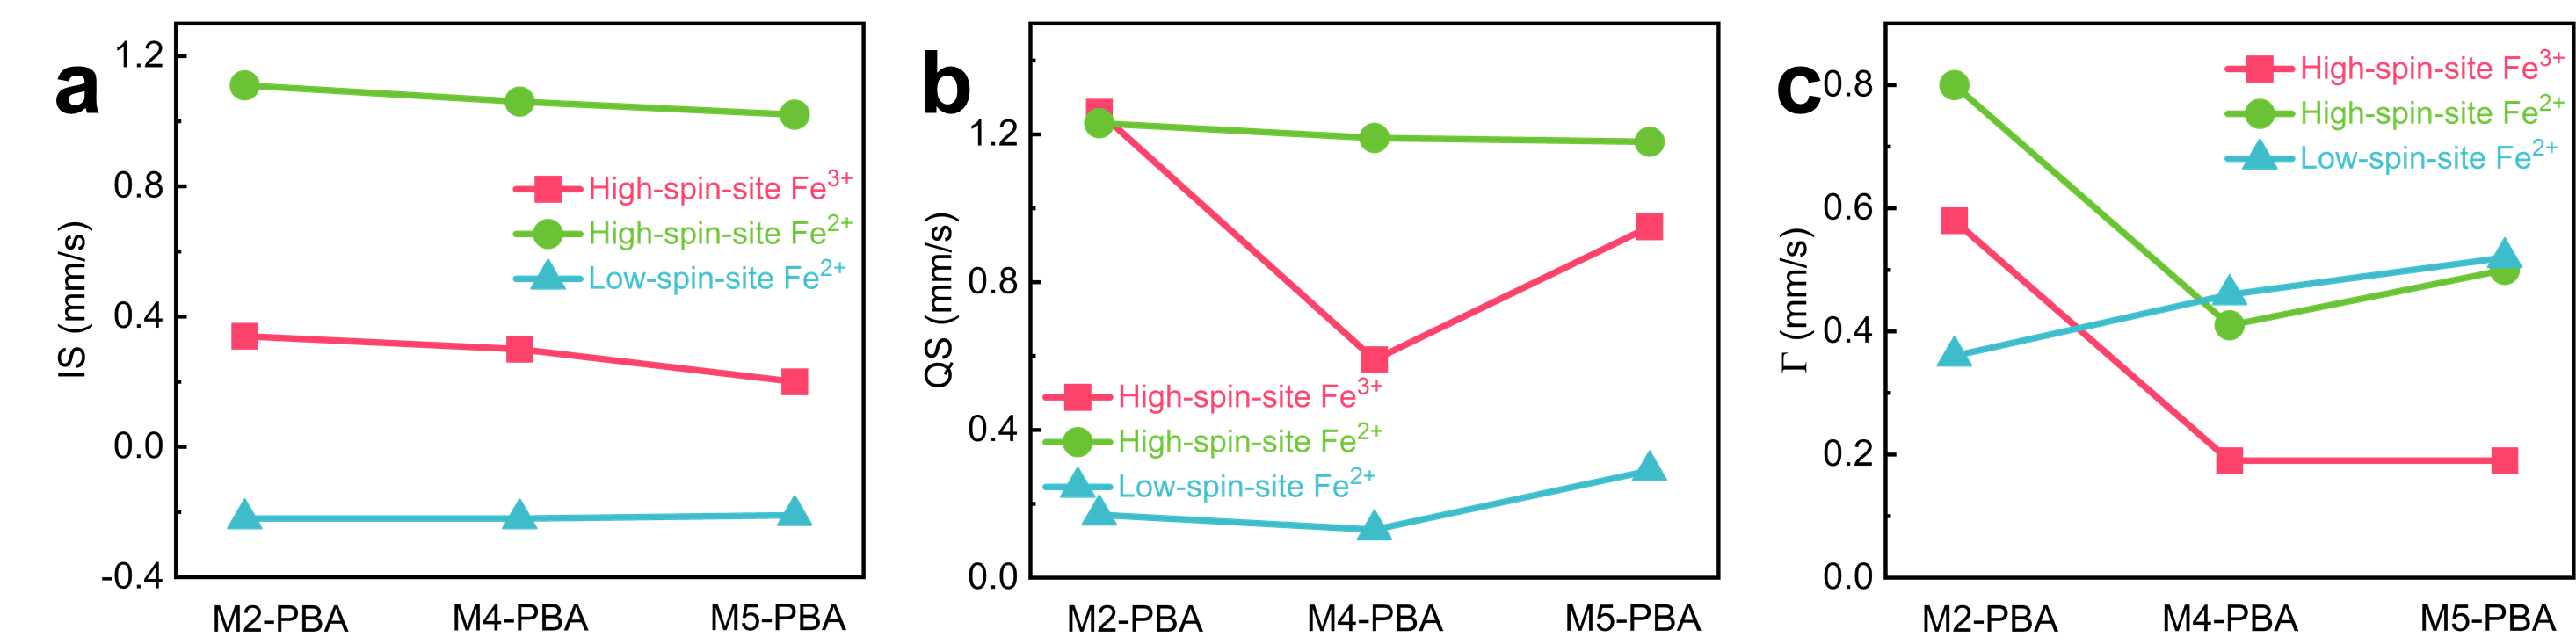


Fig.S13 **a** IS values, **b** QS values and **c** Γ comparation of Mössbauer spectra in M2-PBA, M4-PBA and M5-PBA.


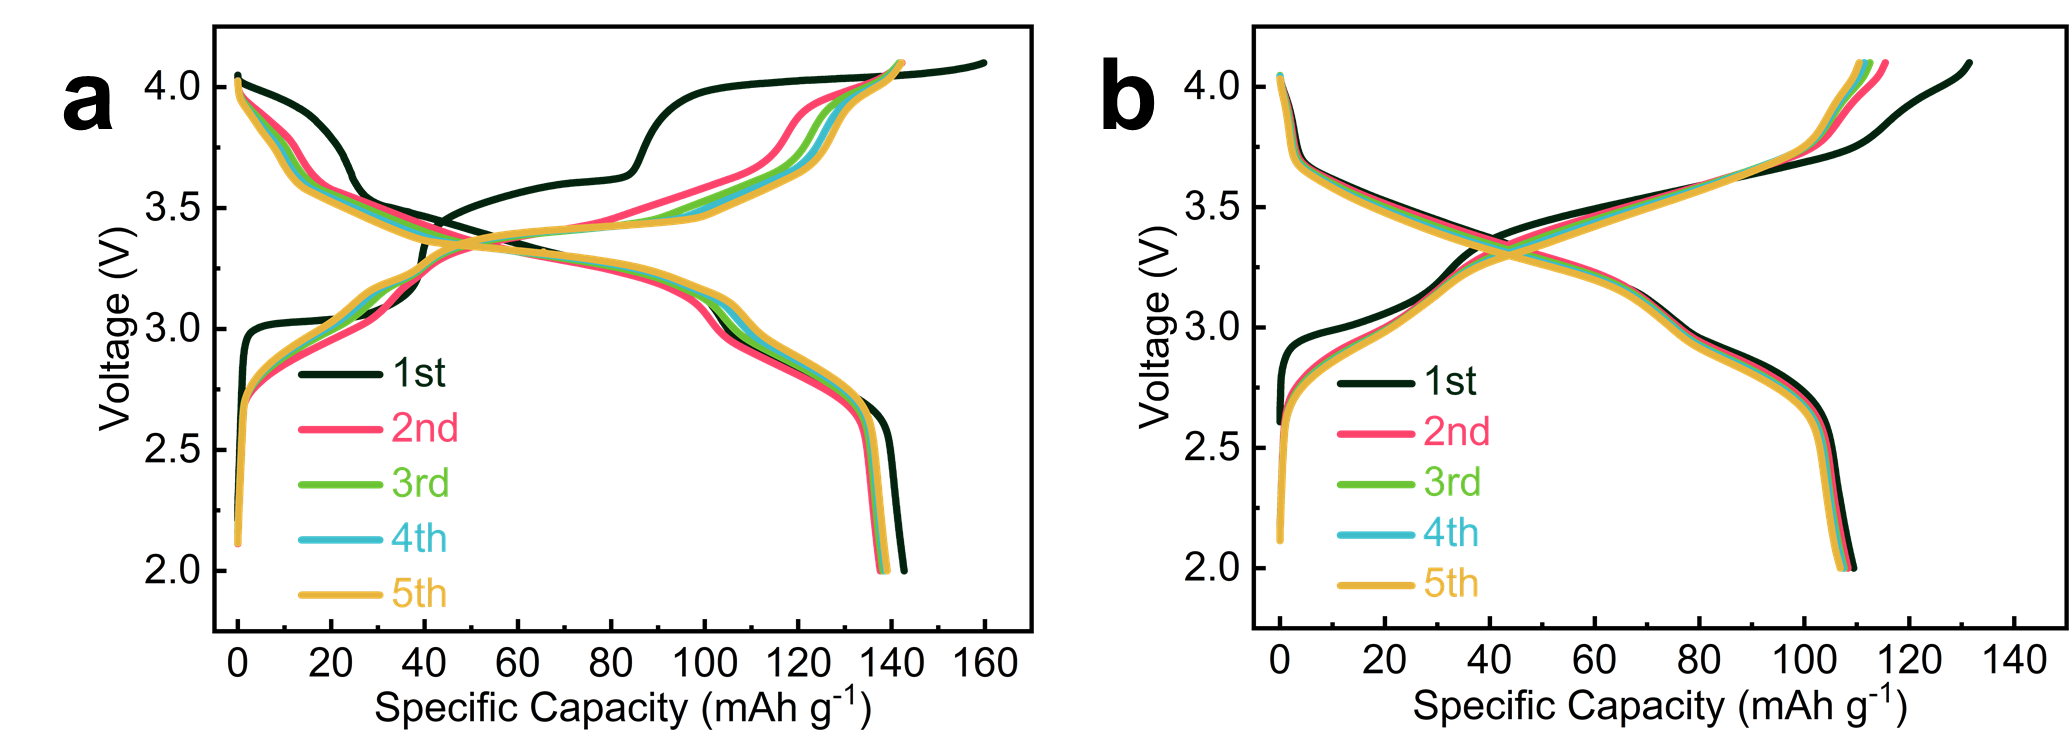


Fig. S14 The first five times galvanostatic charge and discharge curves of **a** M2-PBA and **b** M5-PBA.


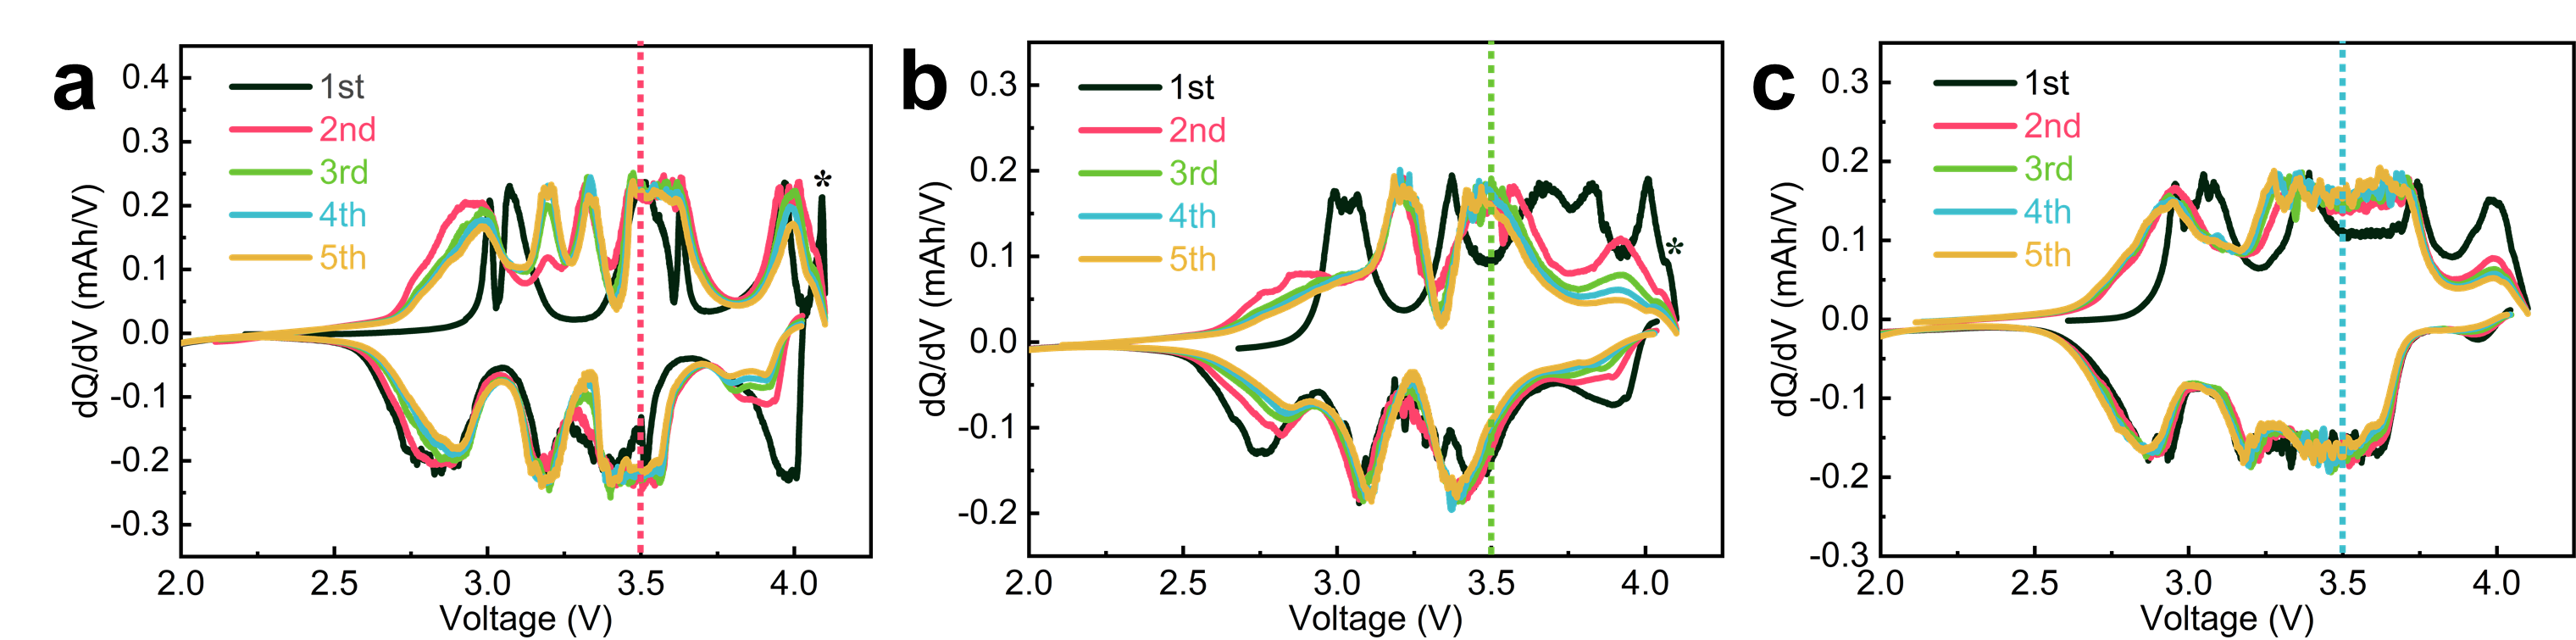


Fig.S15 Comparation of dQ/dV curves. **a** M2-PBA, **b** M4-PBA, and **c** M5-PBA.


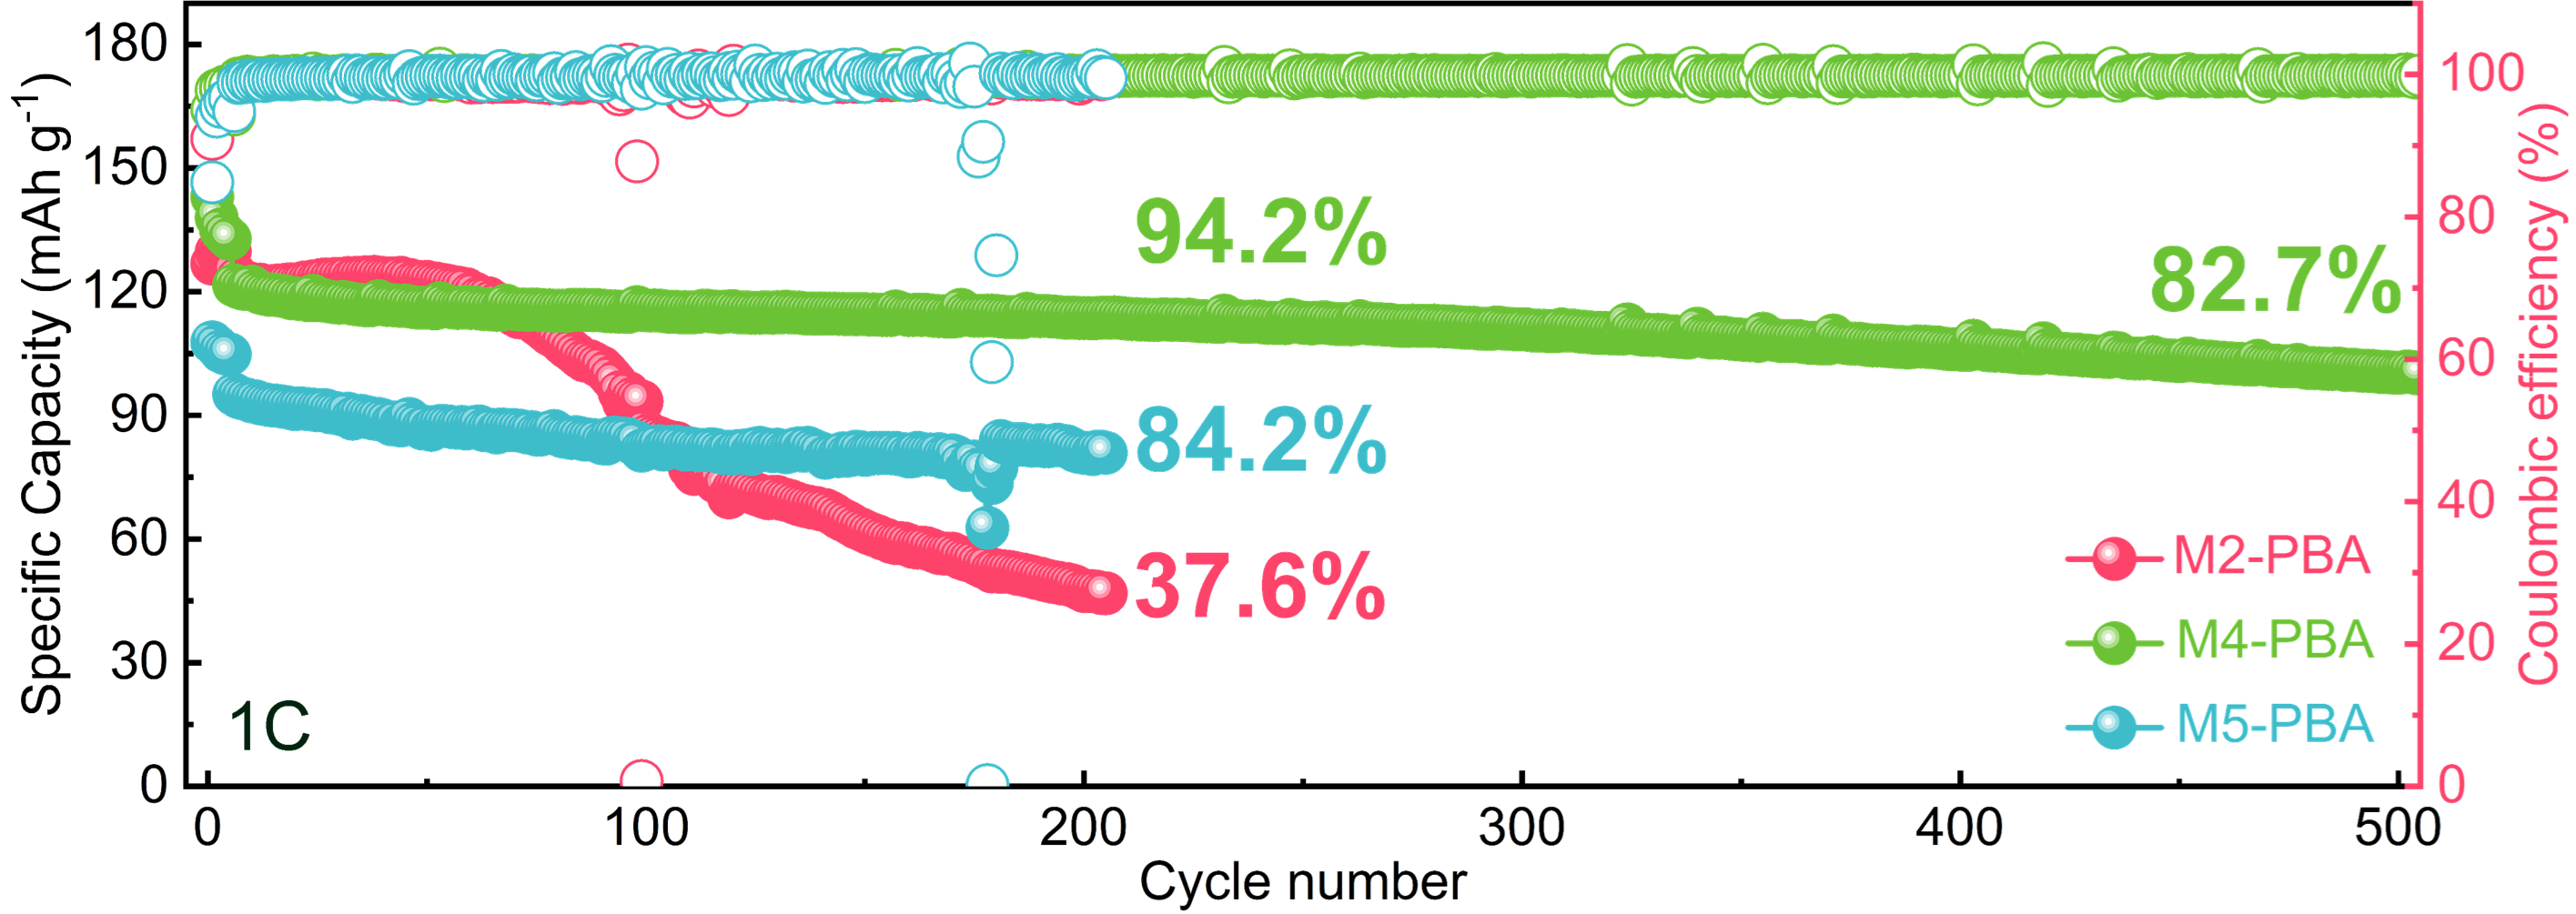


Fig.S16 Comparation of cycling performance at 1 C for M2-PBA, M4-PBA and M5-PBA.


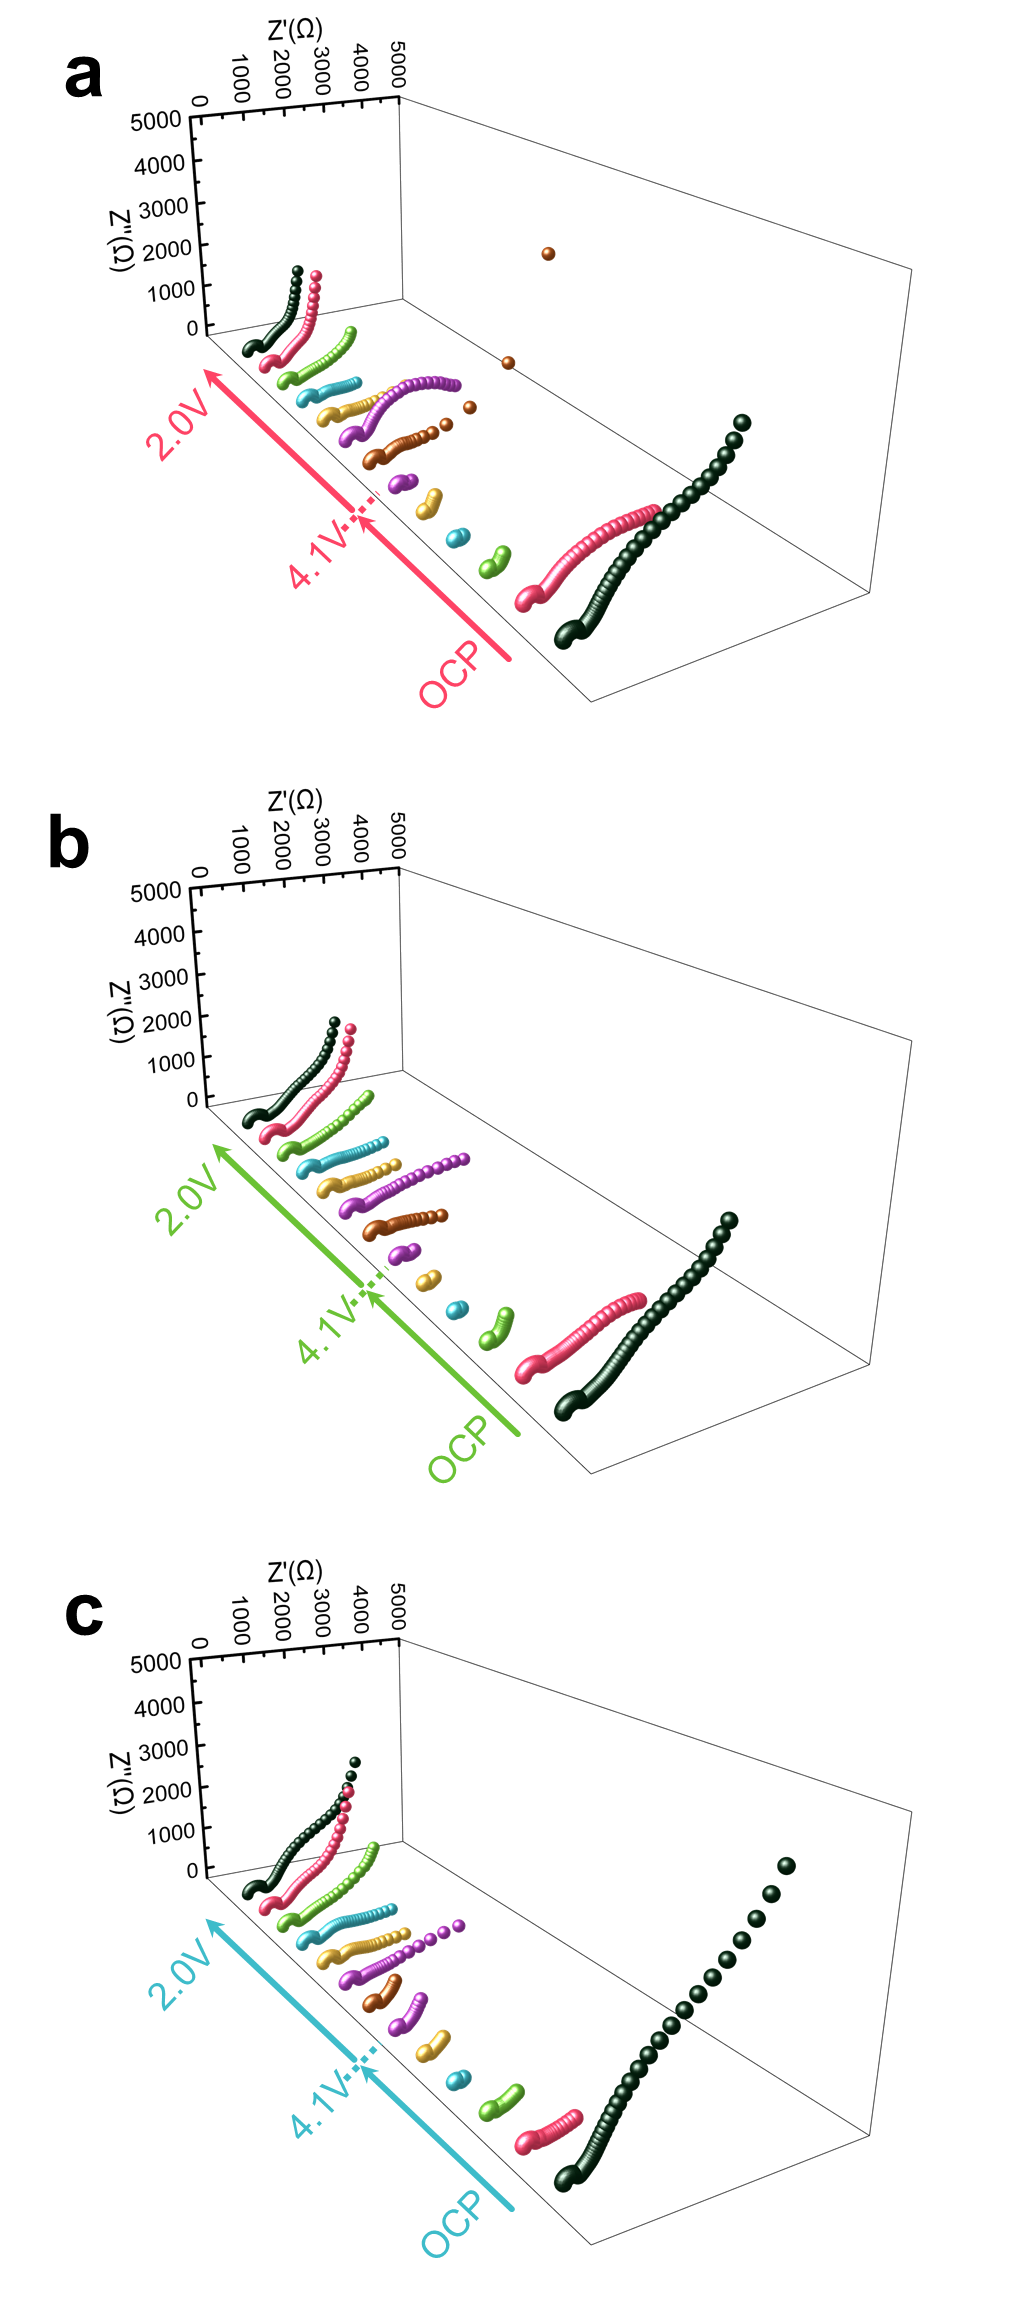


Fig.S17 Comparation of EIS testing results. **a** M2-PBA, **b** M4-PBA, and **c** M5-PBA.


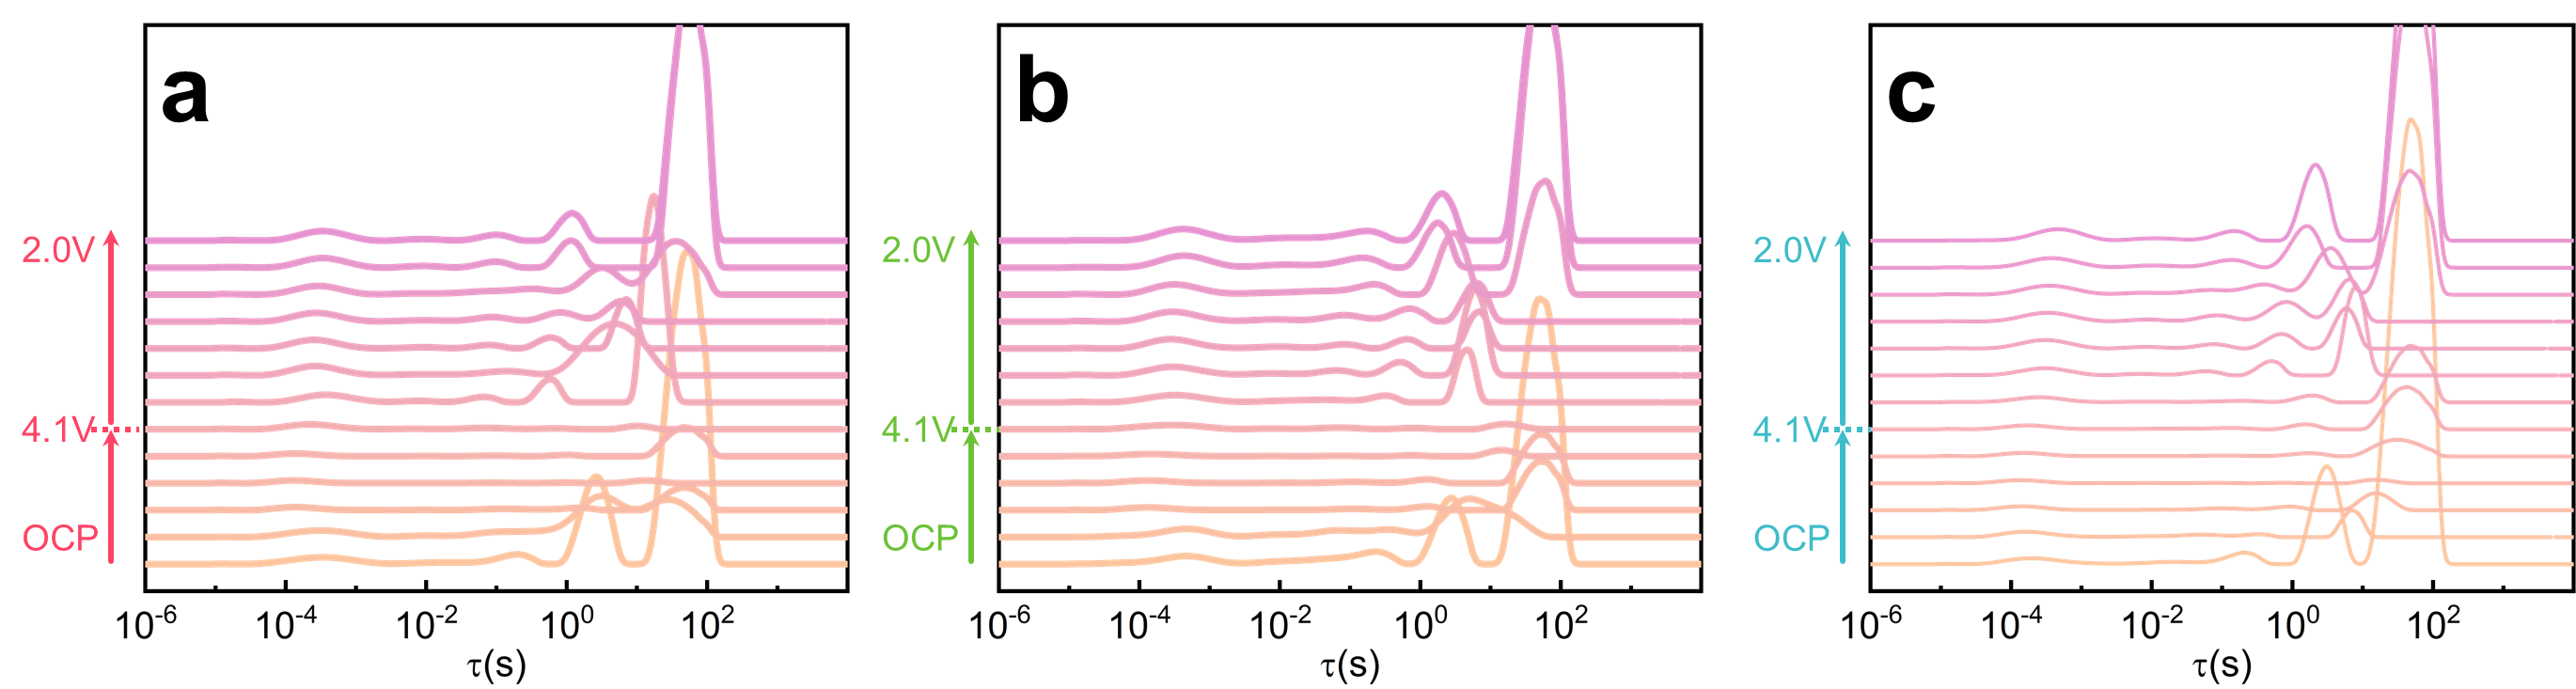


Fig.S18 Comparation of DRT results. **a** M2-PBA, **b** M4-PBA, and **c** M5-PBA.


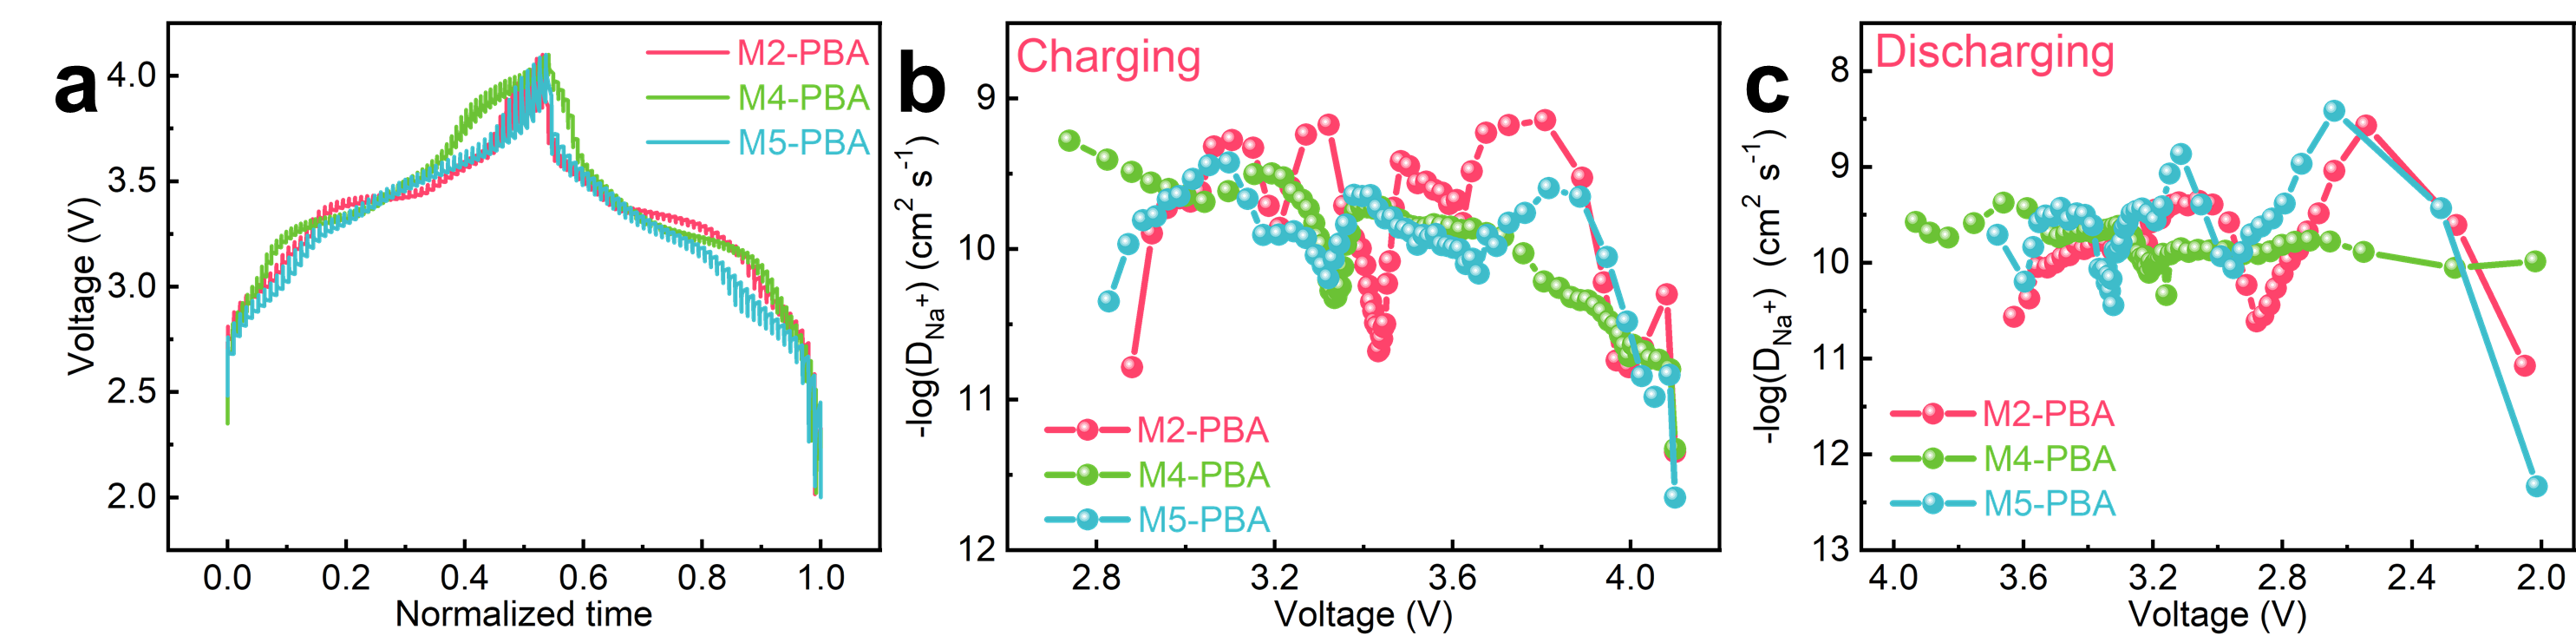


Fig.S19 **a** GITT testing curves, Na+ diffusion coefficients altered with electrode voltage for **b** charging and **c** discharging procedure in M2-PBA, M4-PBA and M5-PBA.


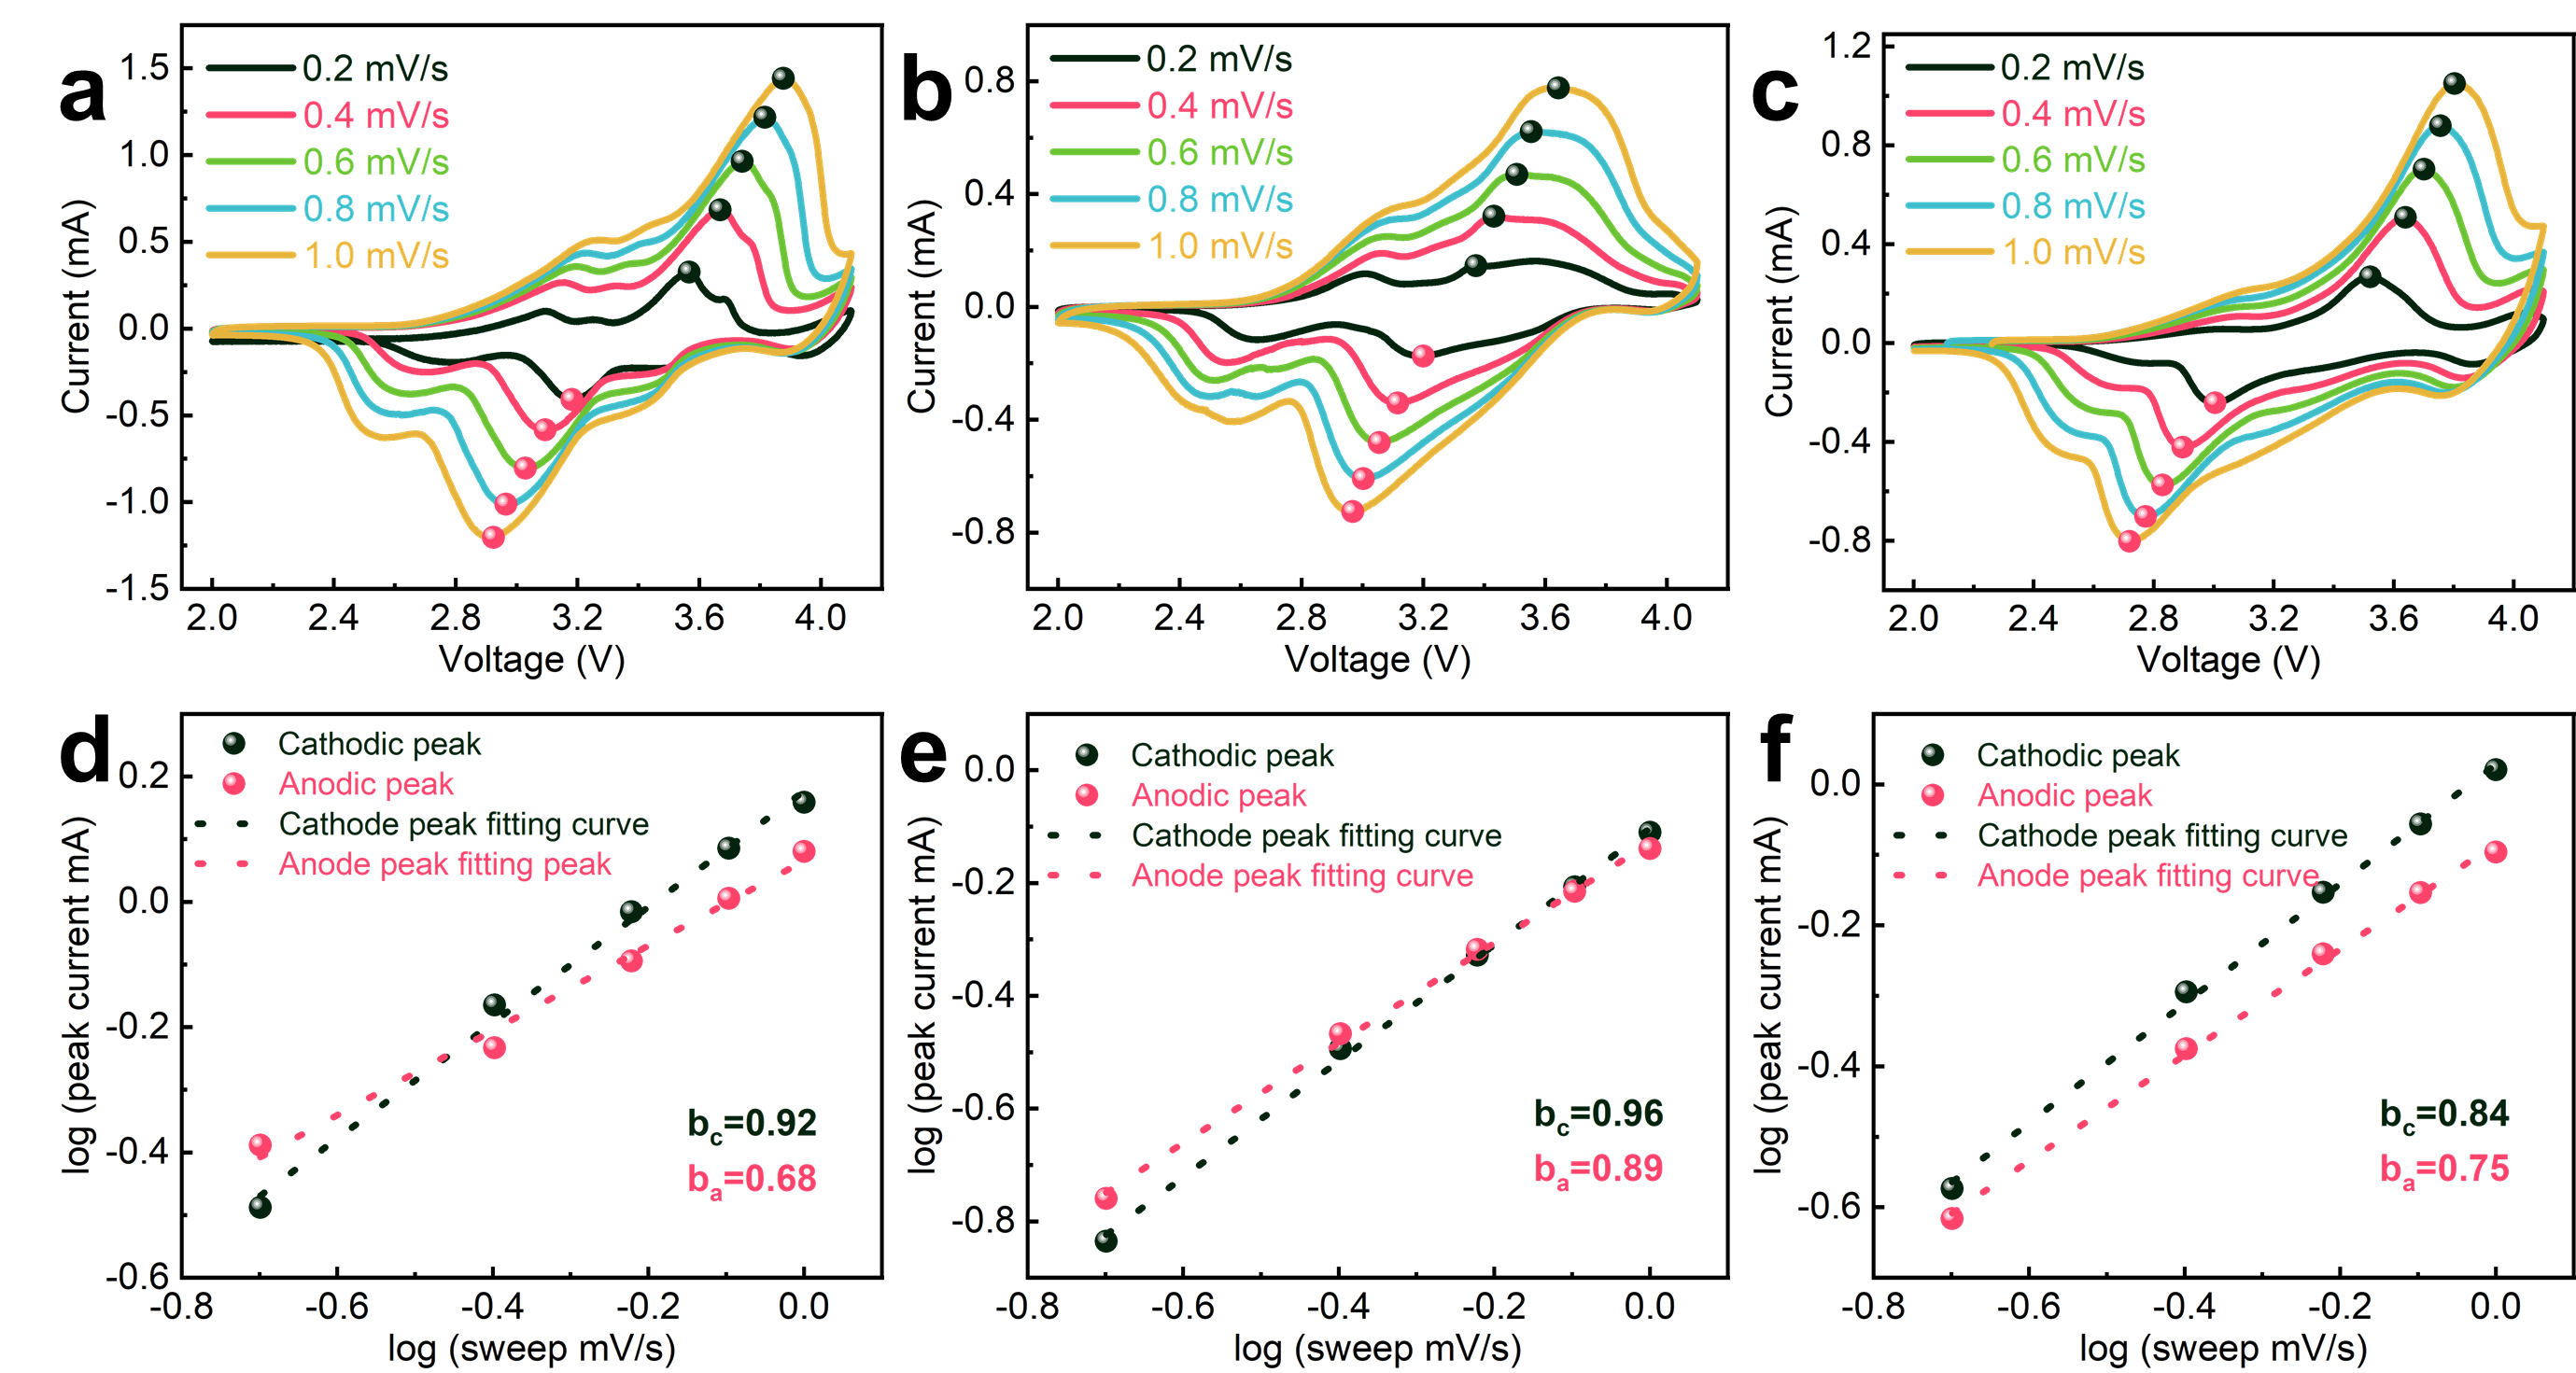


Fig.S20 CV curves at various scan rates: **a** M2-PBA, **b** M4-PBA, and **c** M5-PBA. Corresponding line-fitting slopes: **d** M2-PBA, **e** M4-PBA, and **f** M5-PBA.


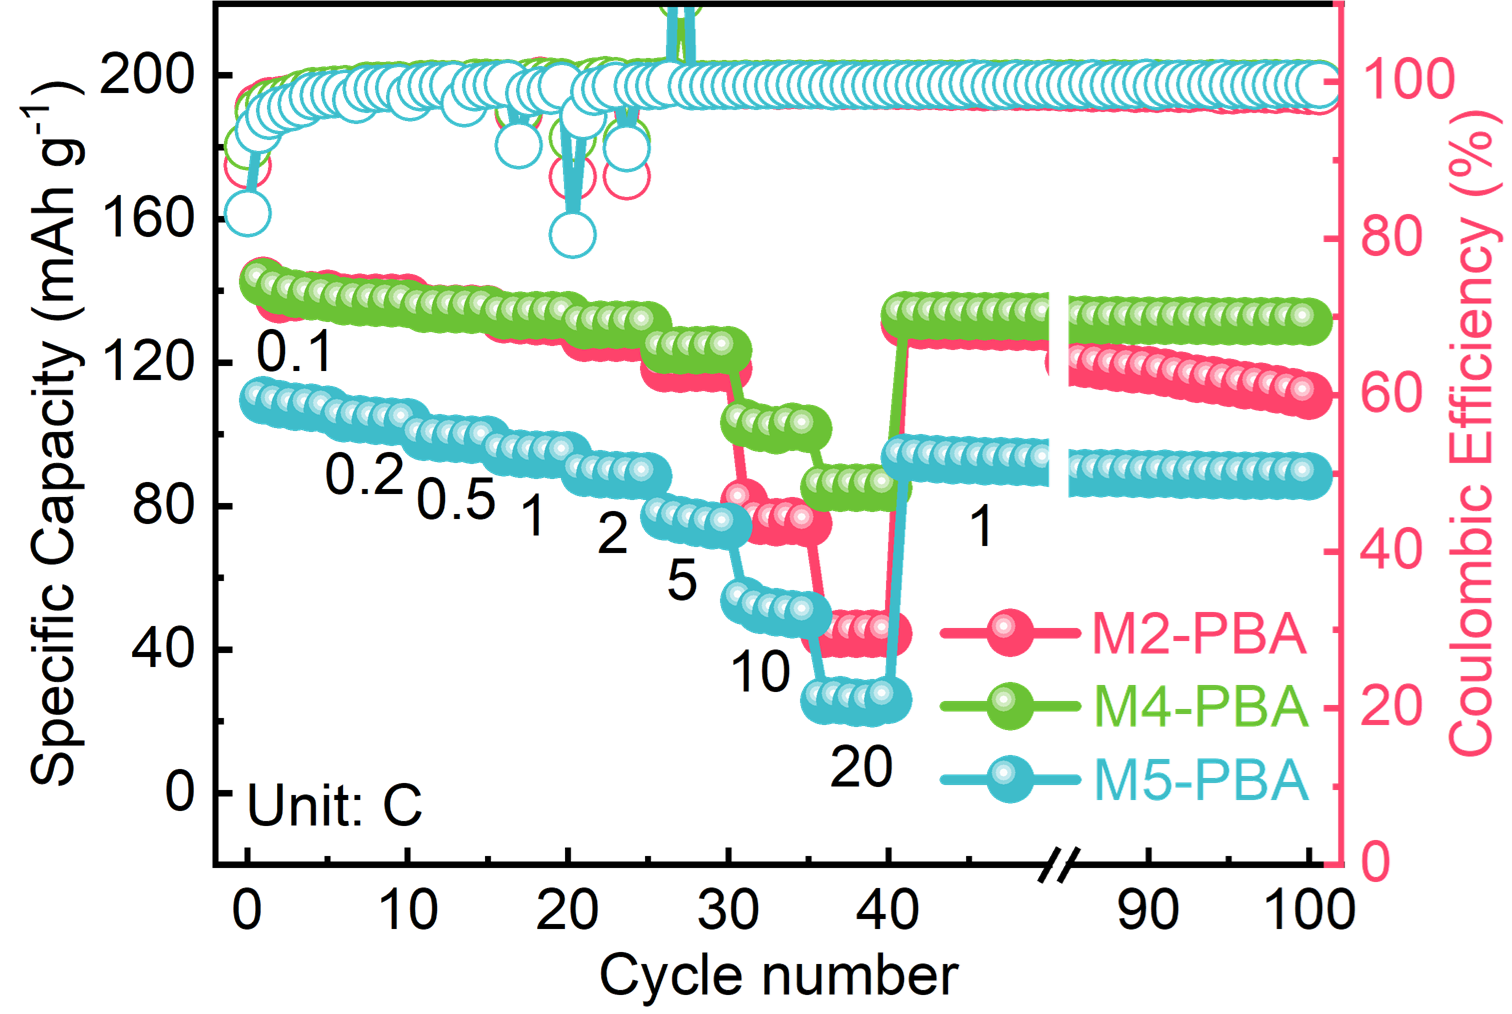


Fig.S21 Comparation of rate performance.


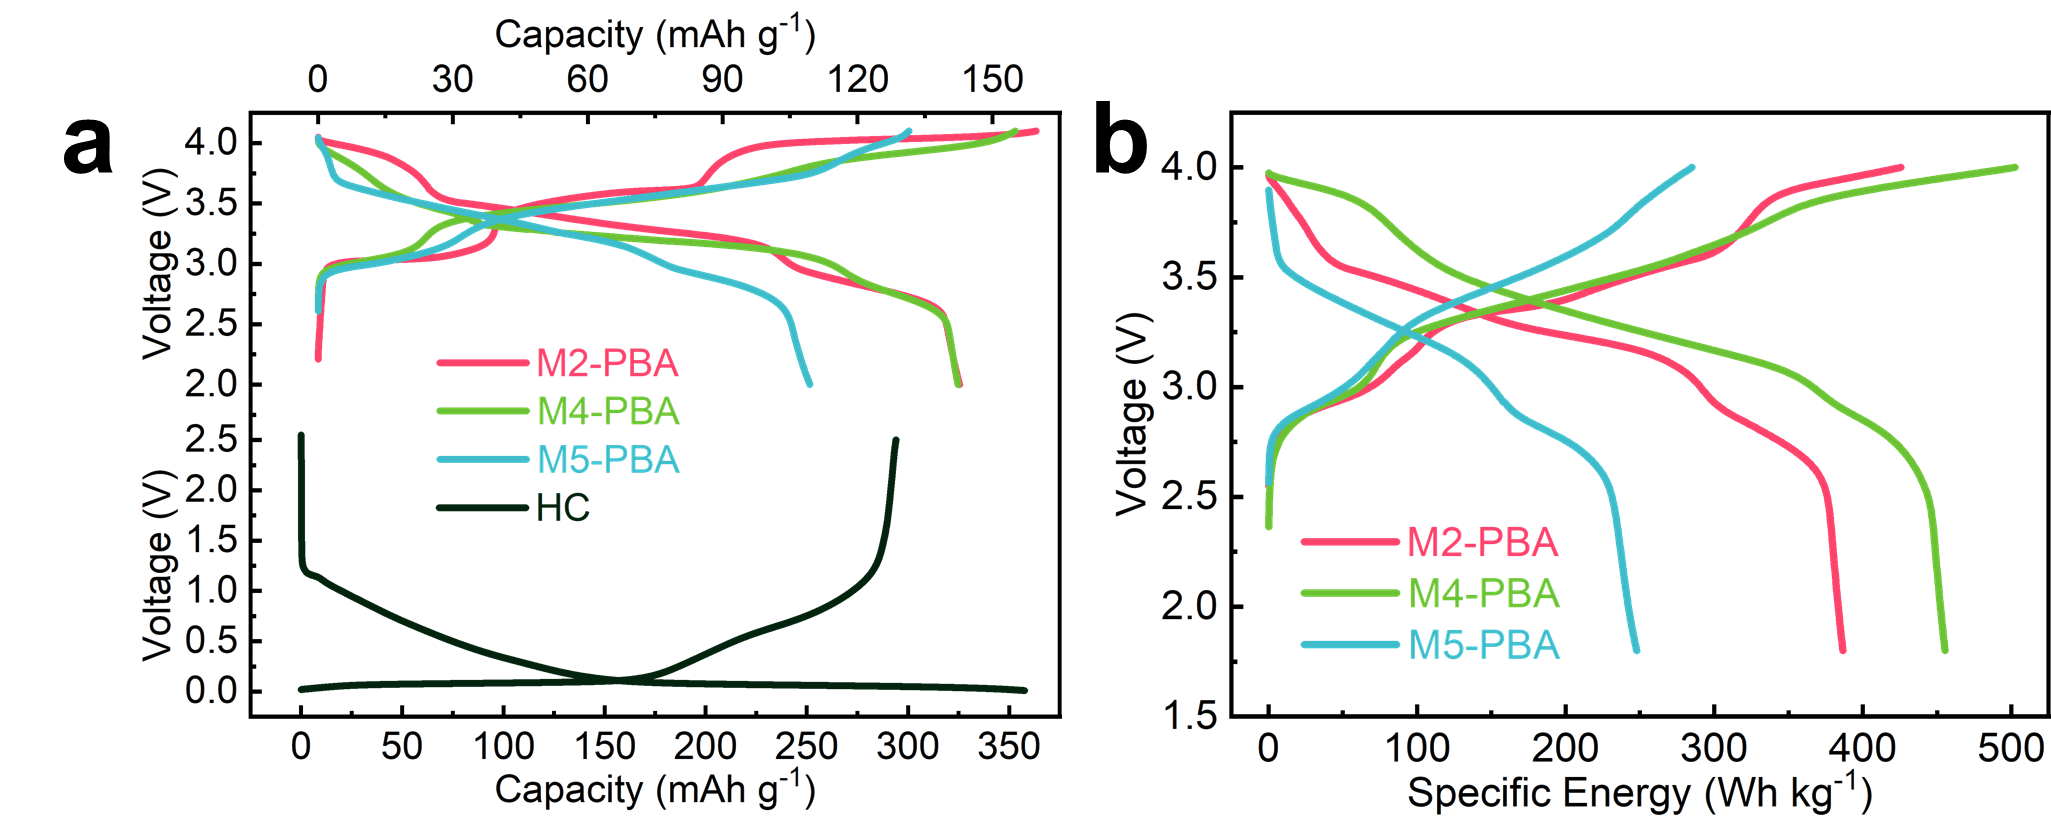


Fig.S22 Comparation of full cell electrochemical performance. **a** specific capacity of PBA cathodes and hard carbon anode, **b** specific energy.


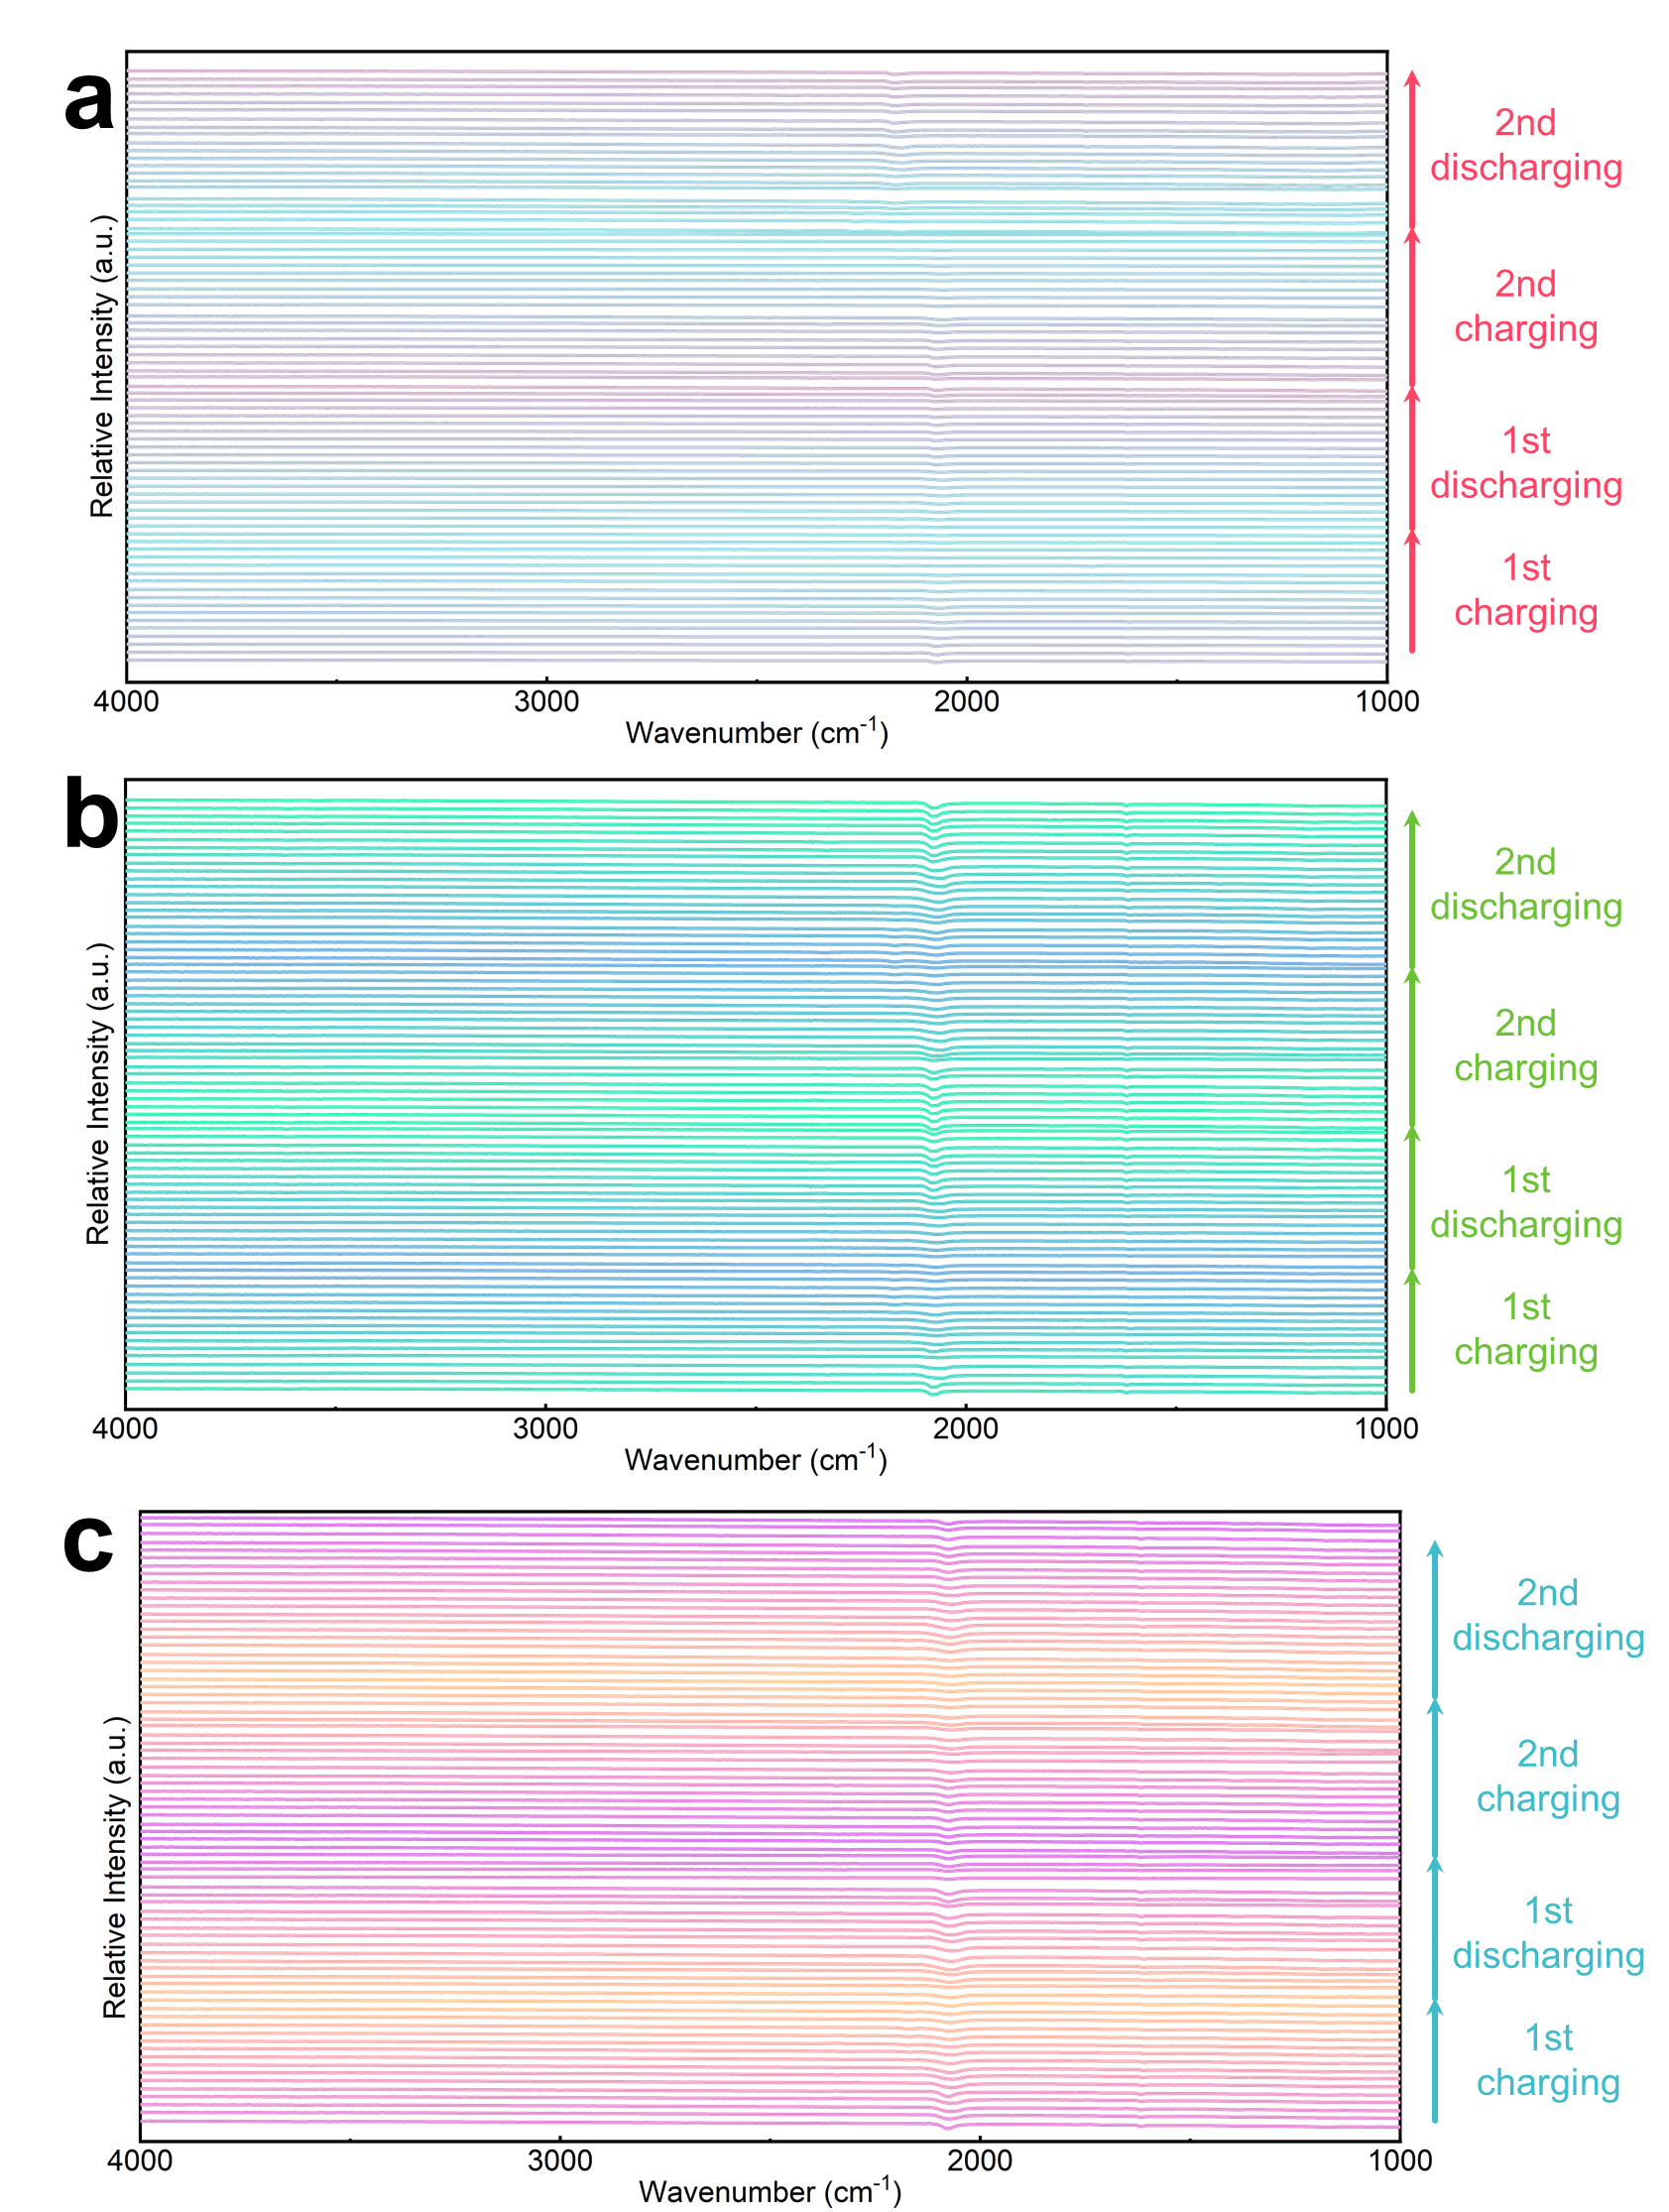


Fig.S23 Comparation of in-situ FT-IR full spectra during the first two cycles. **a** M2-PBA, **b** M4-PBA, and **c** M5-PBA.


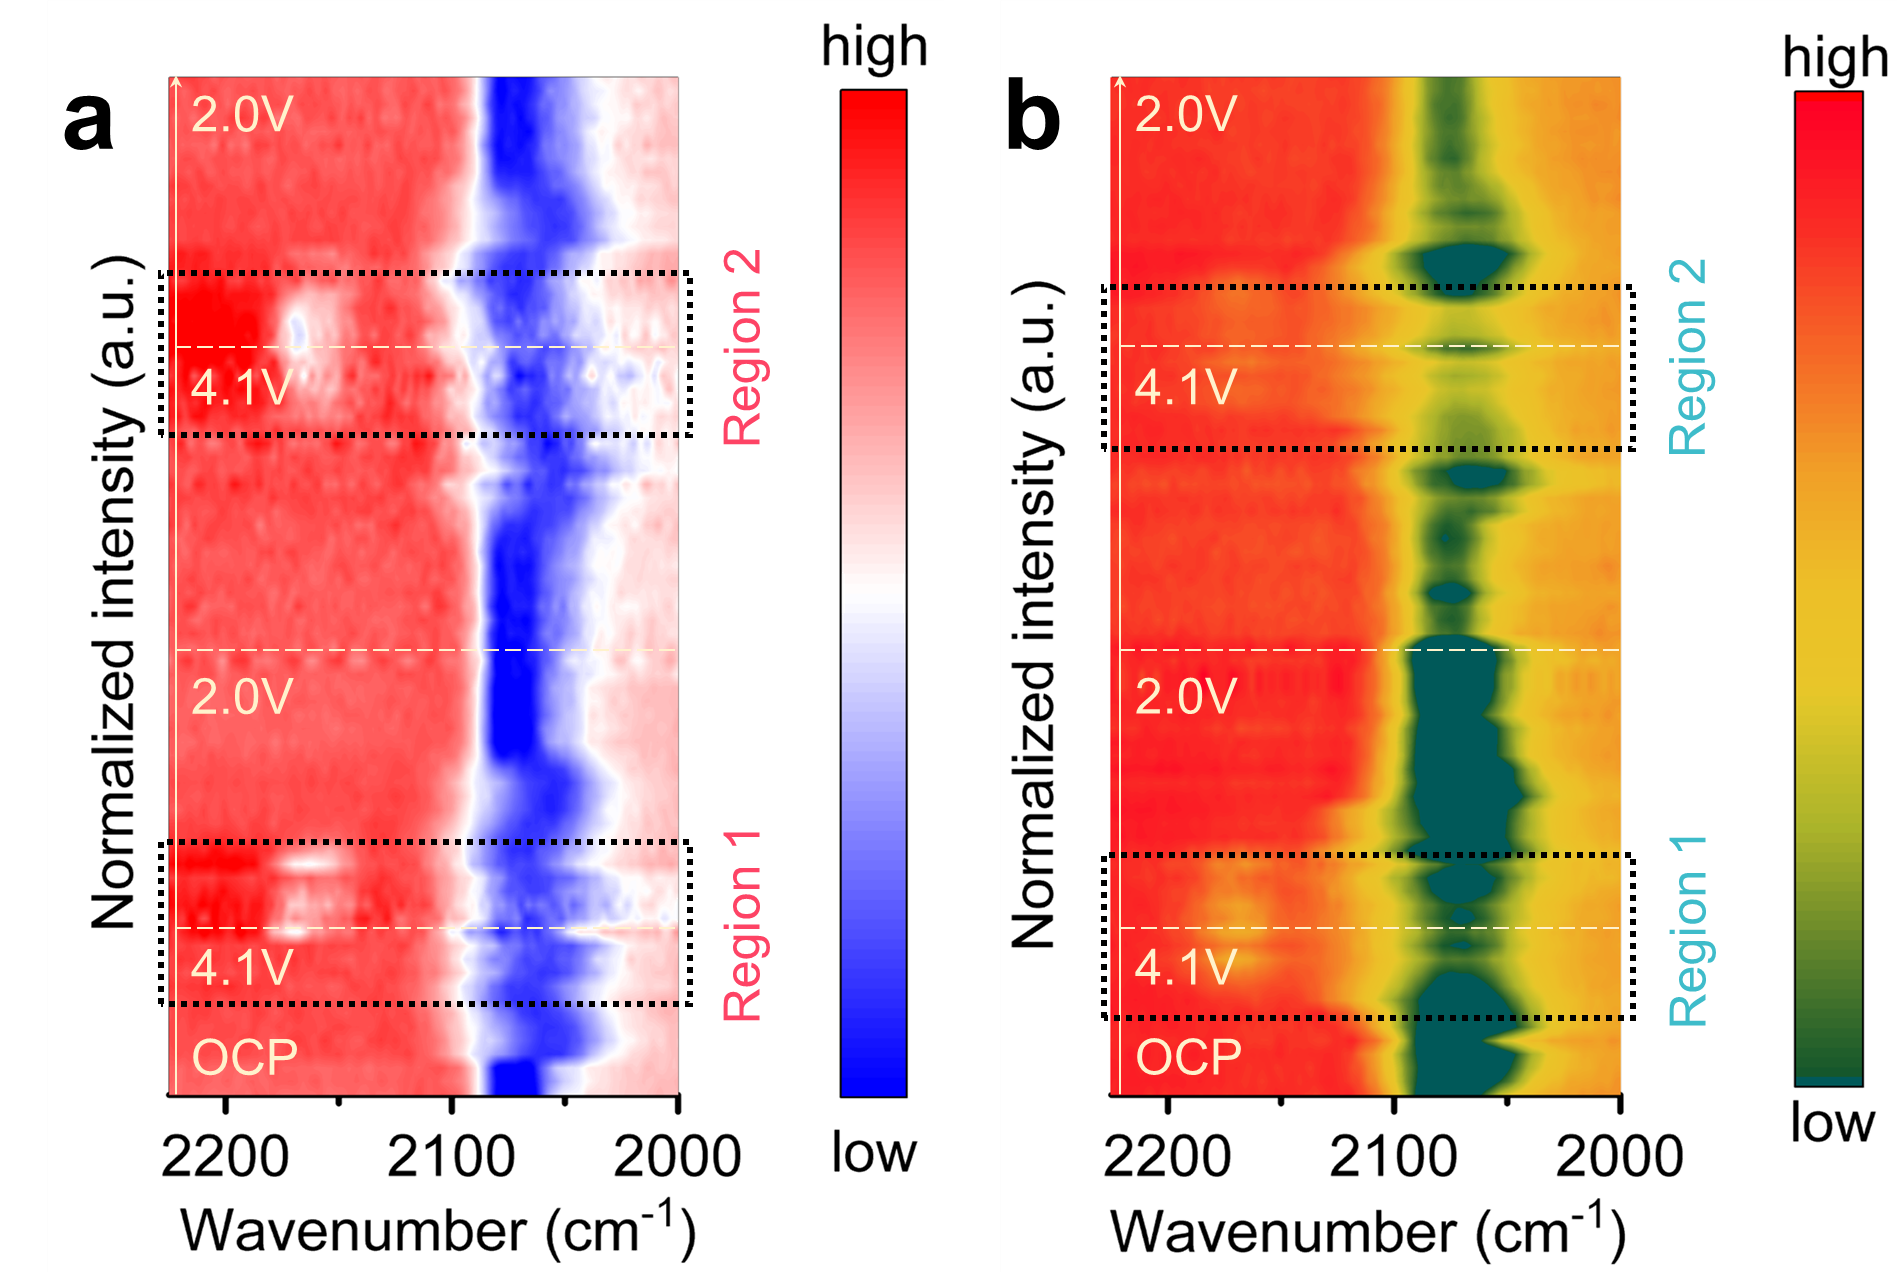


Fig.S24 In-situ FT-IR results of **a** M2-PBA, and **b** M5-PBA.


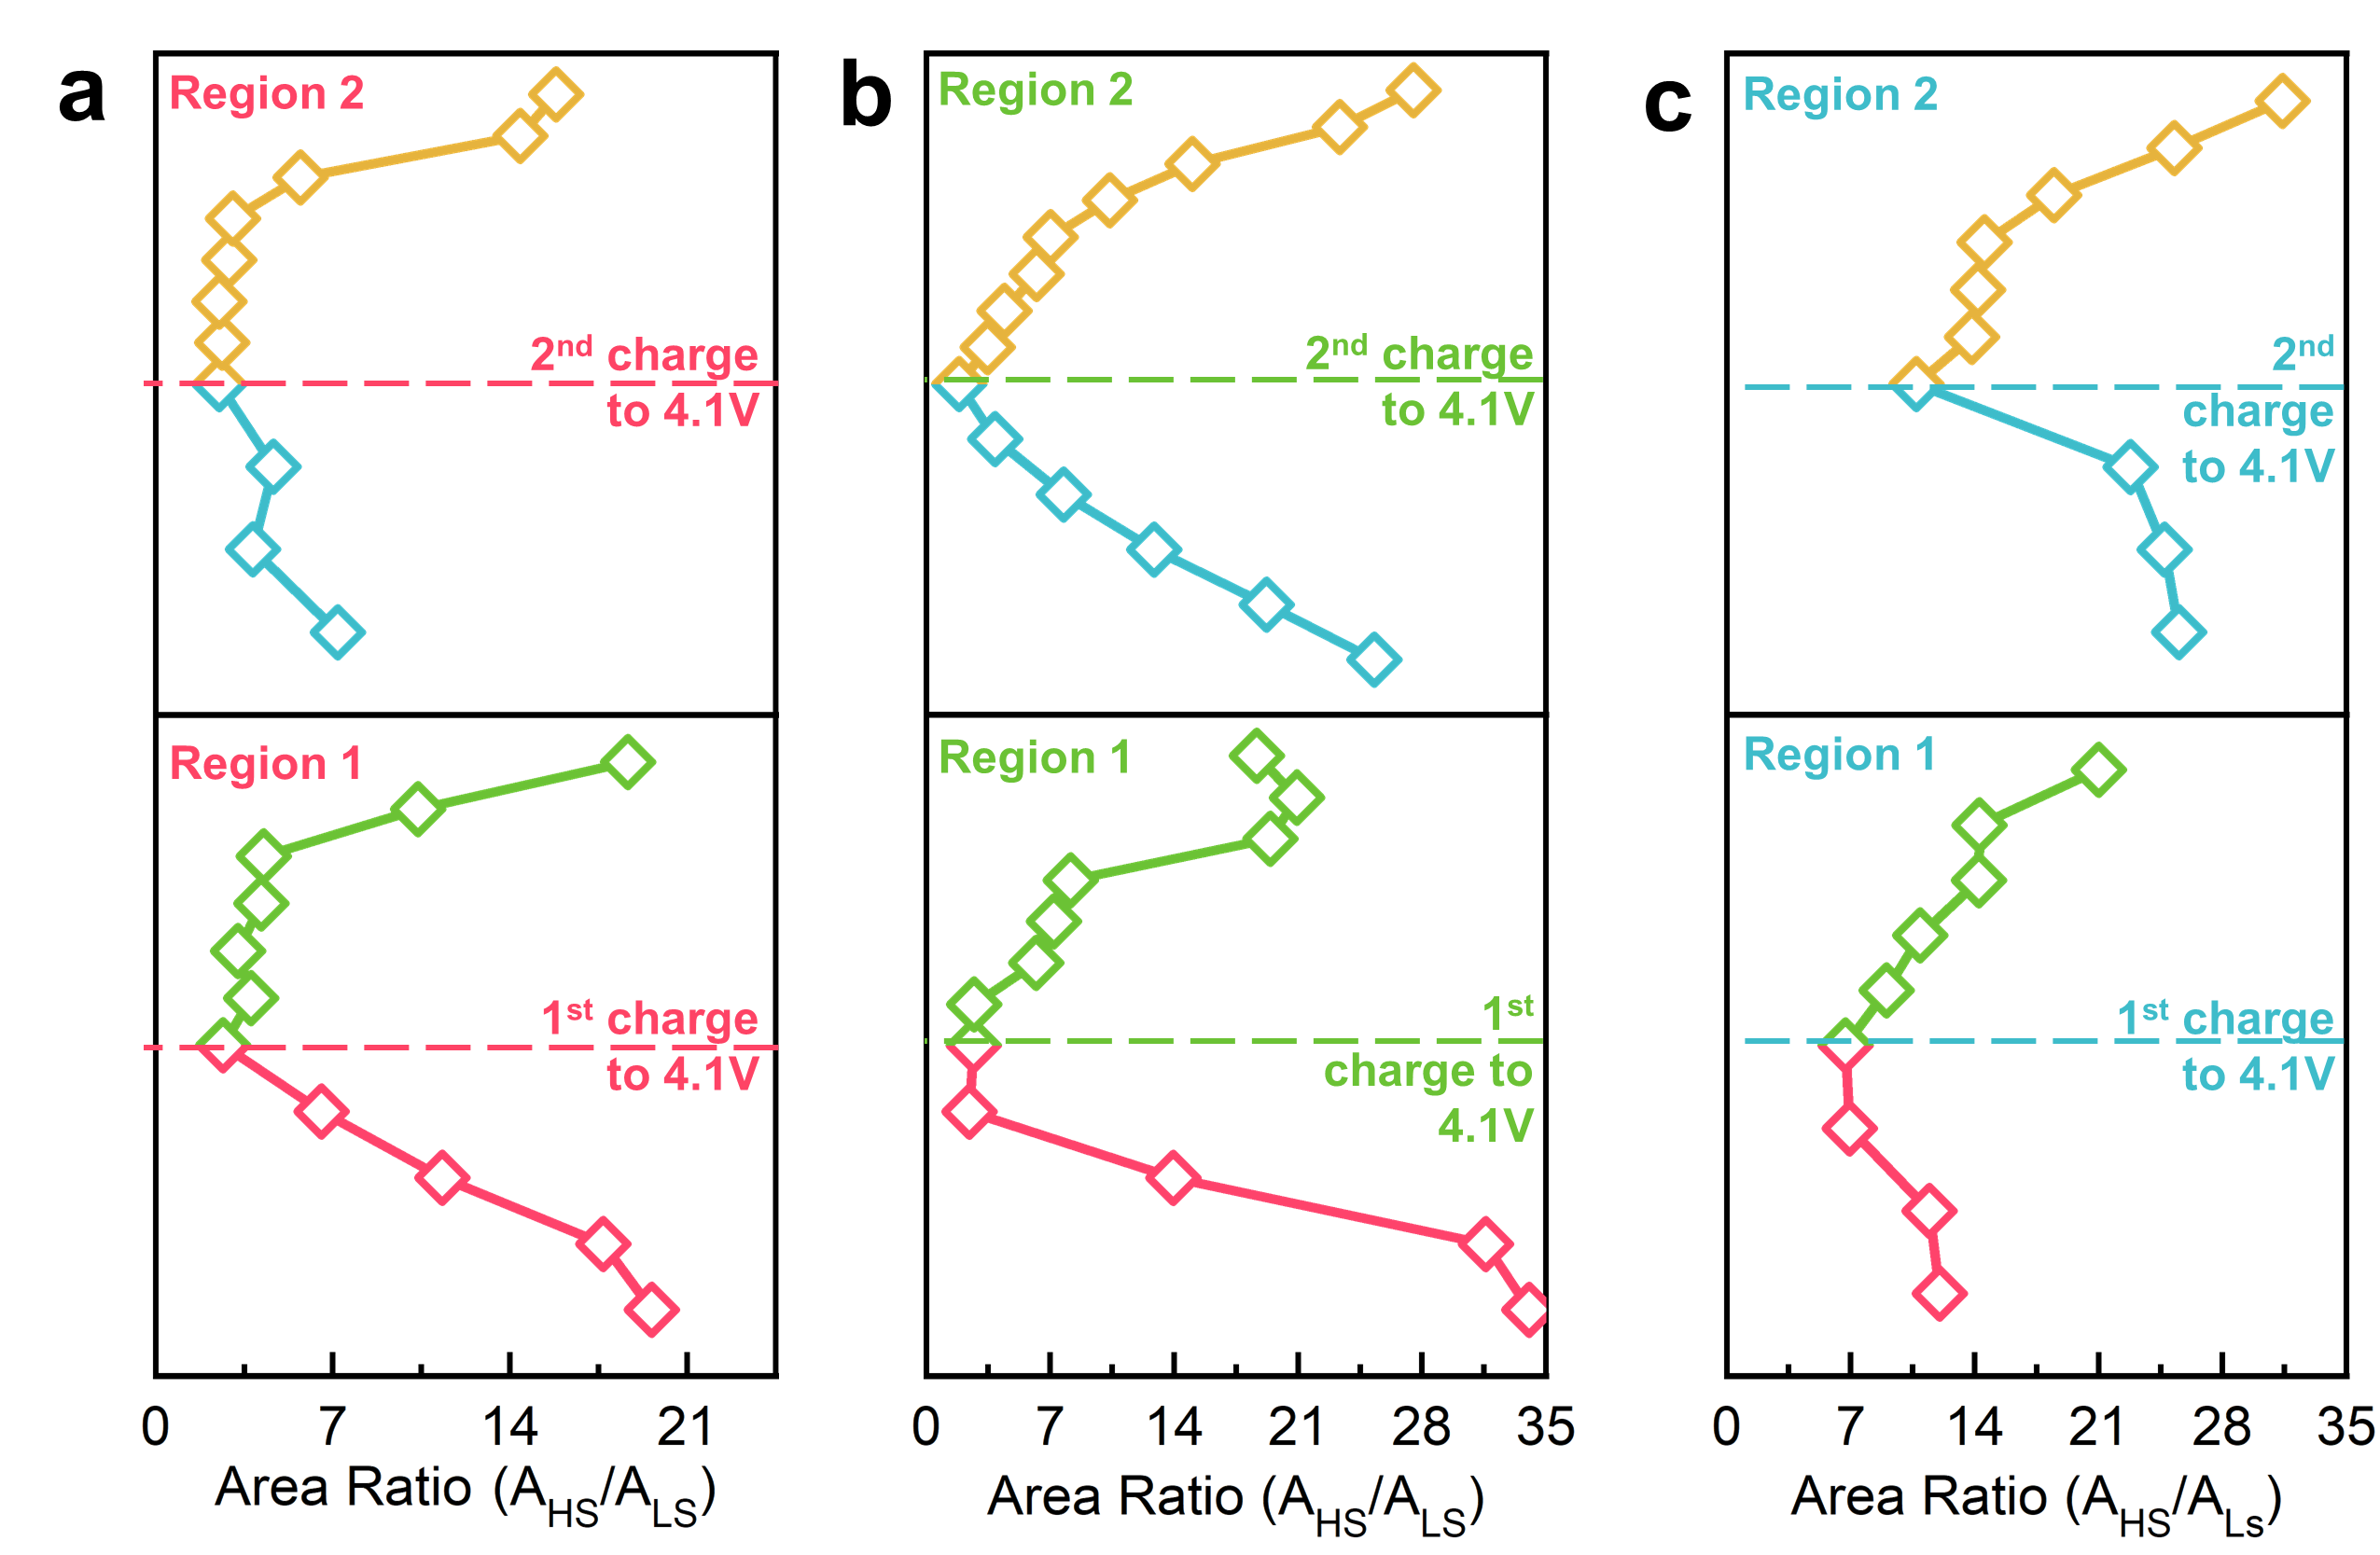


Fig.S25 The area ratios of peaks 1 and 2 in in-situ FT-IR for **a** M2-PBA, **b** M4-PBA and **c** M5-PBA.


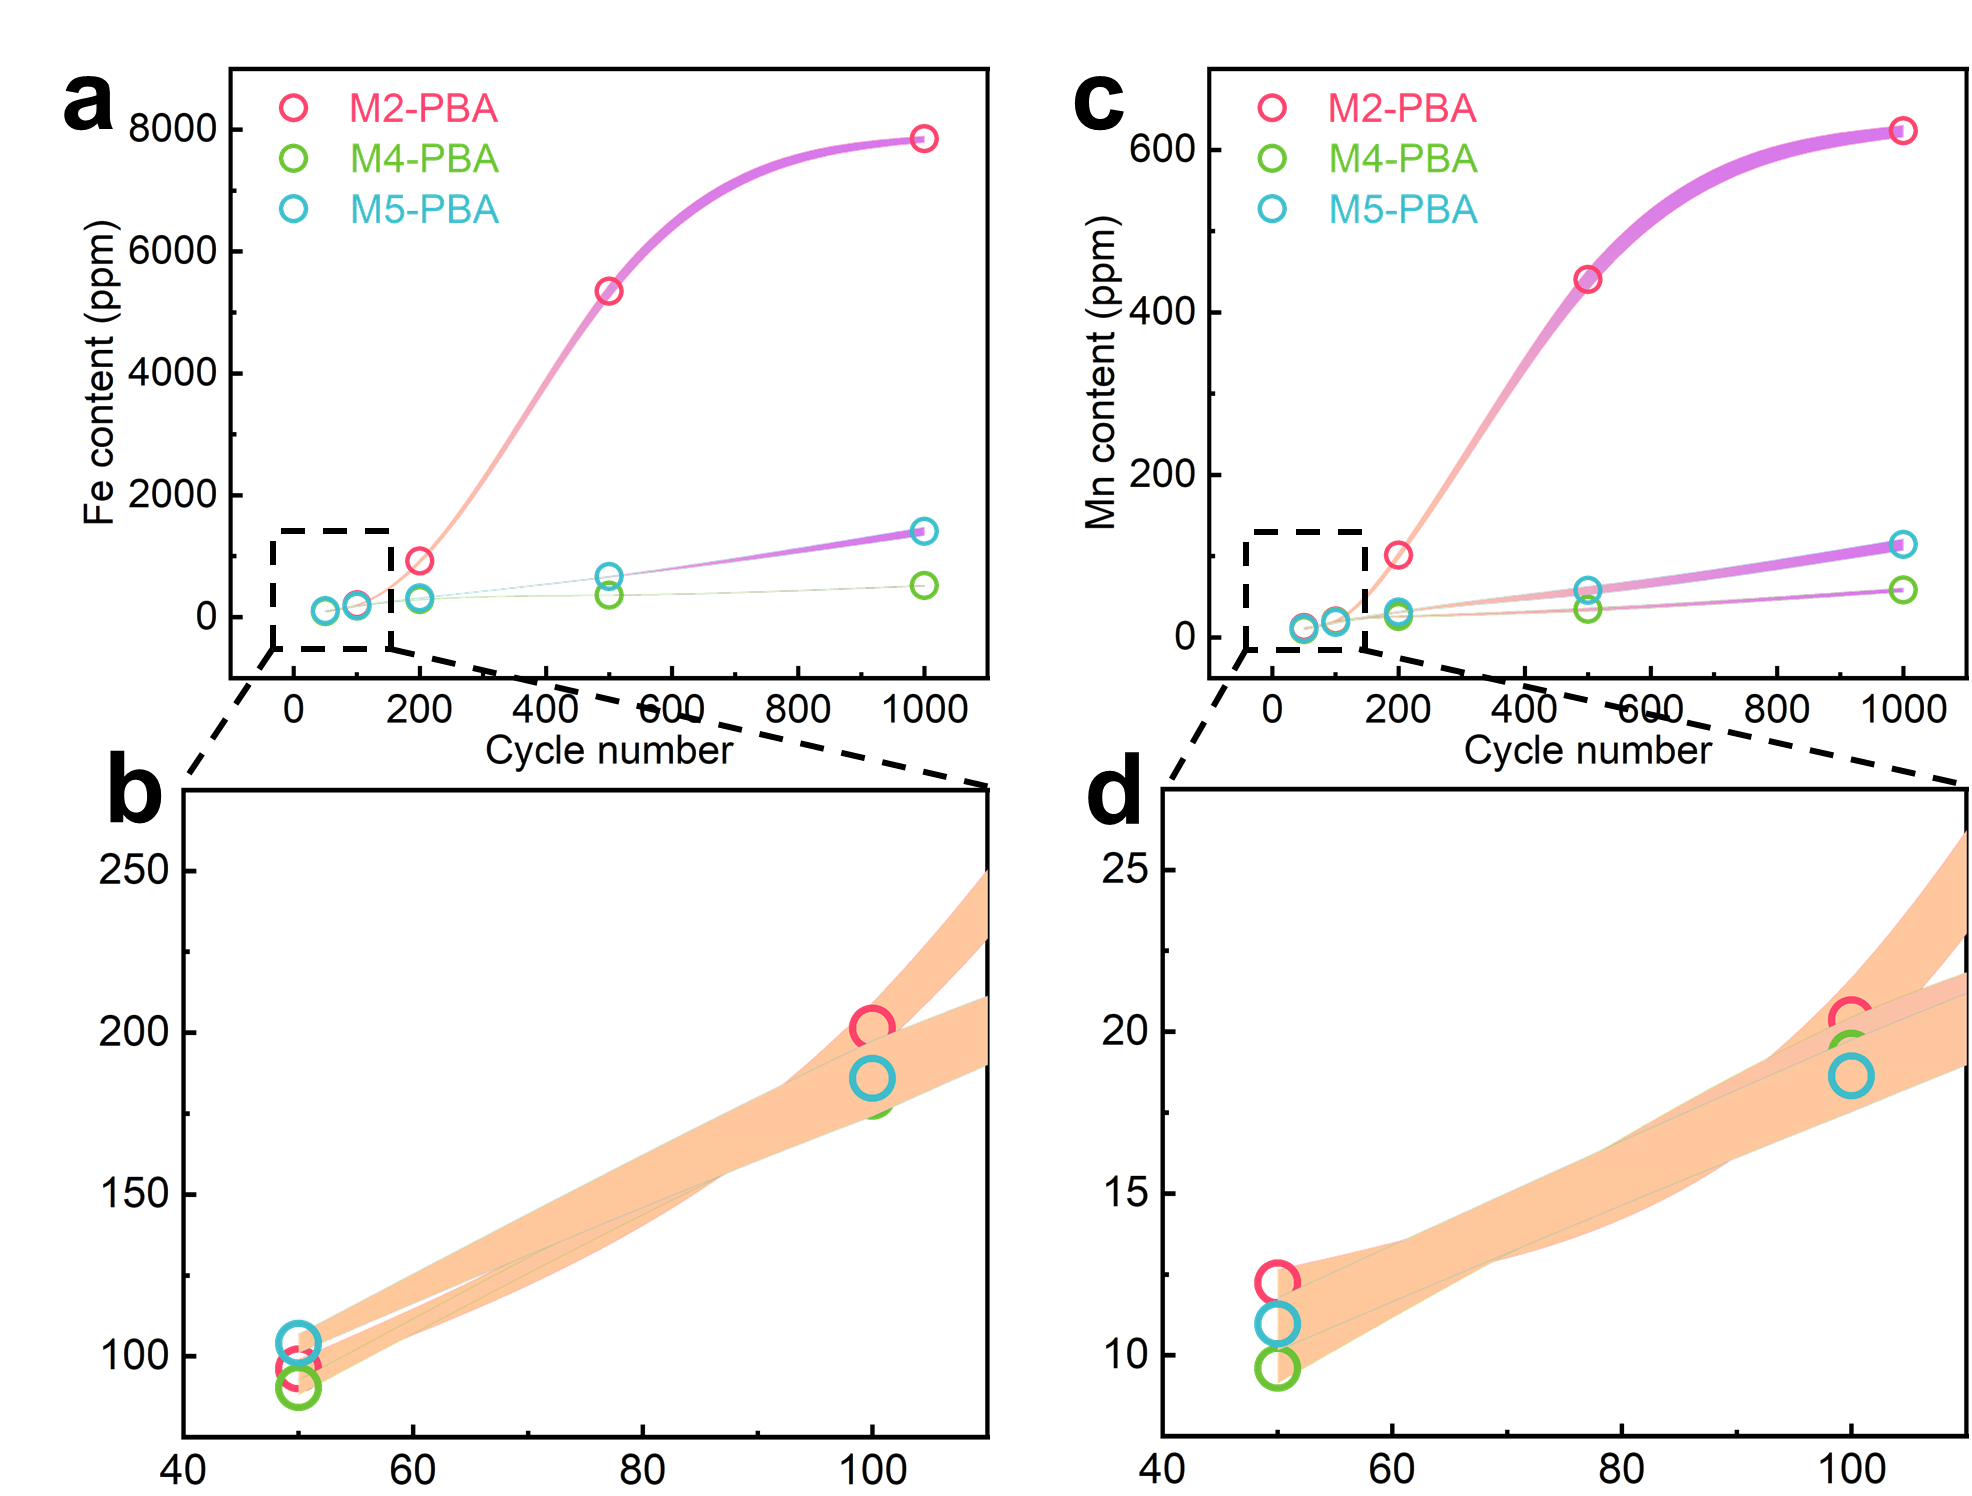


Fig.S26 Ex-situ ICP-OES testing results of the dissolvement metal elements in the electrolyte for M2-PBA, M4-PBA and M5-PBA with current density of 5C. Three sets of parallel samples form error bands, and the hollow circle mark represents the average of the three samples. **a**, **b** Fe content, and **c**, **d** Mn content.


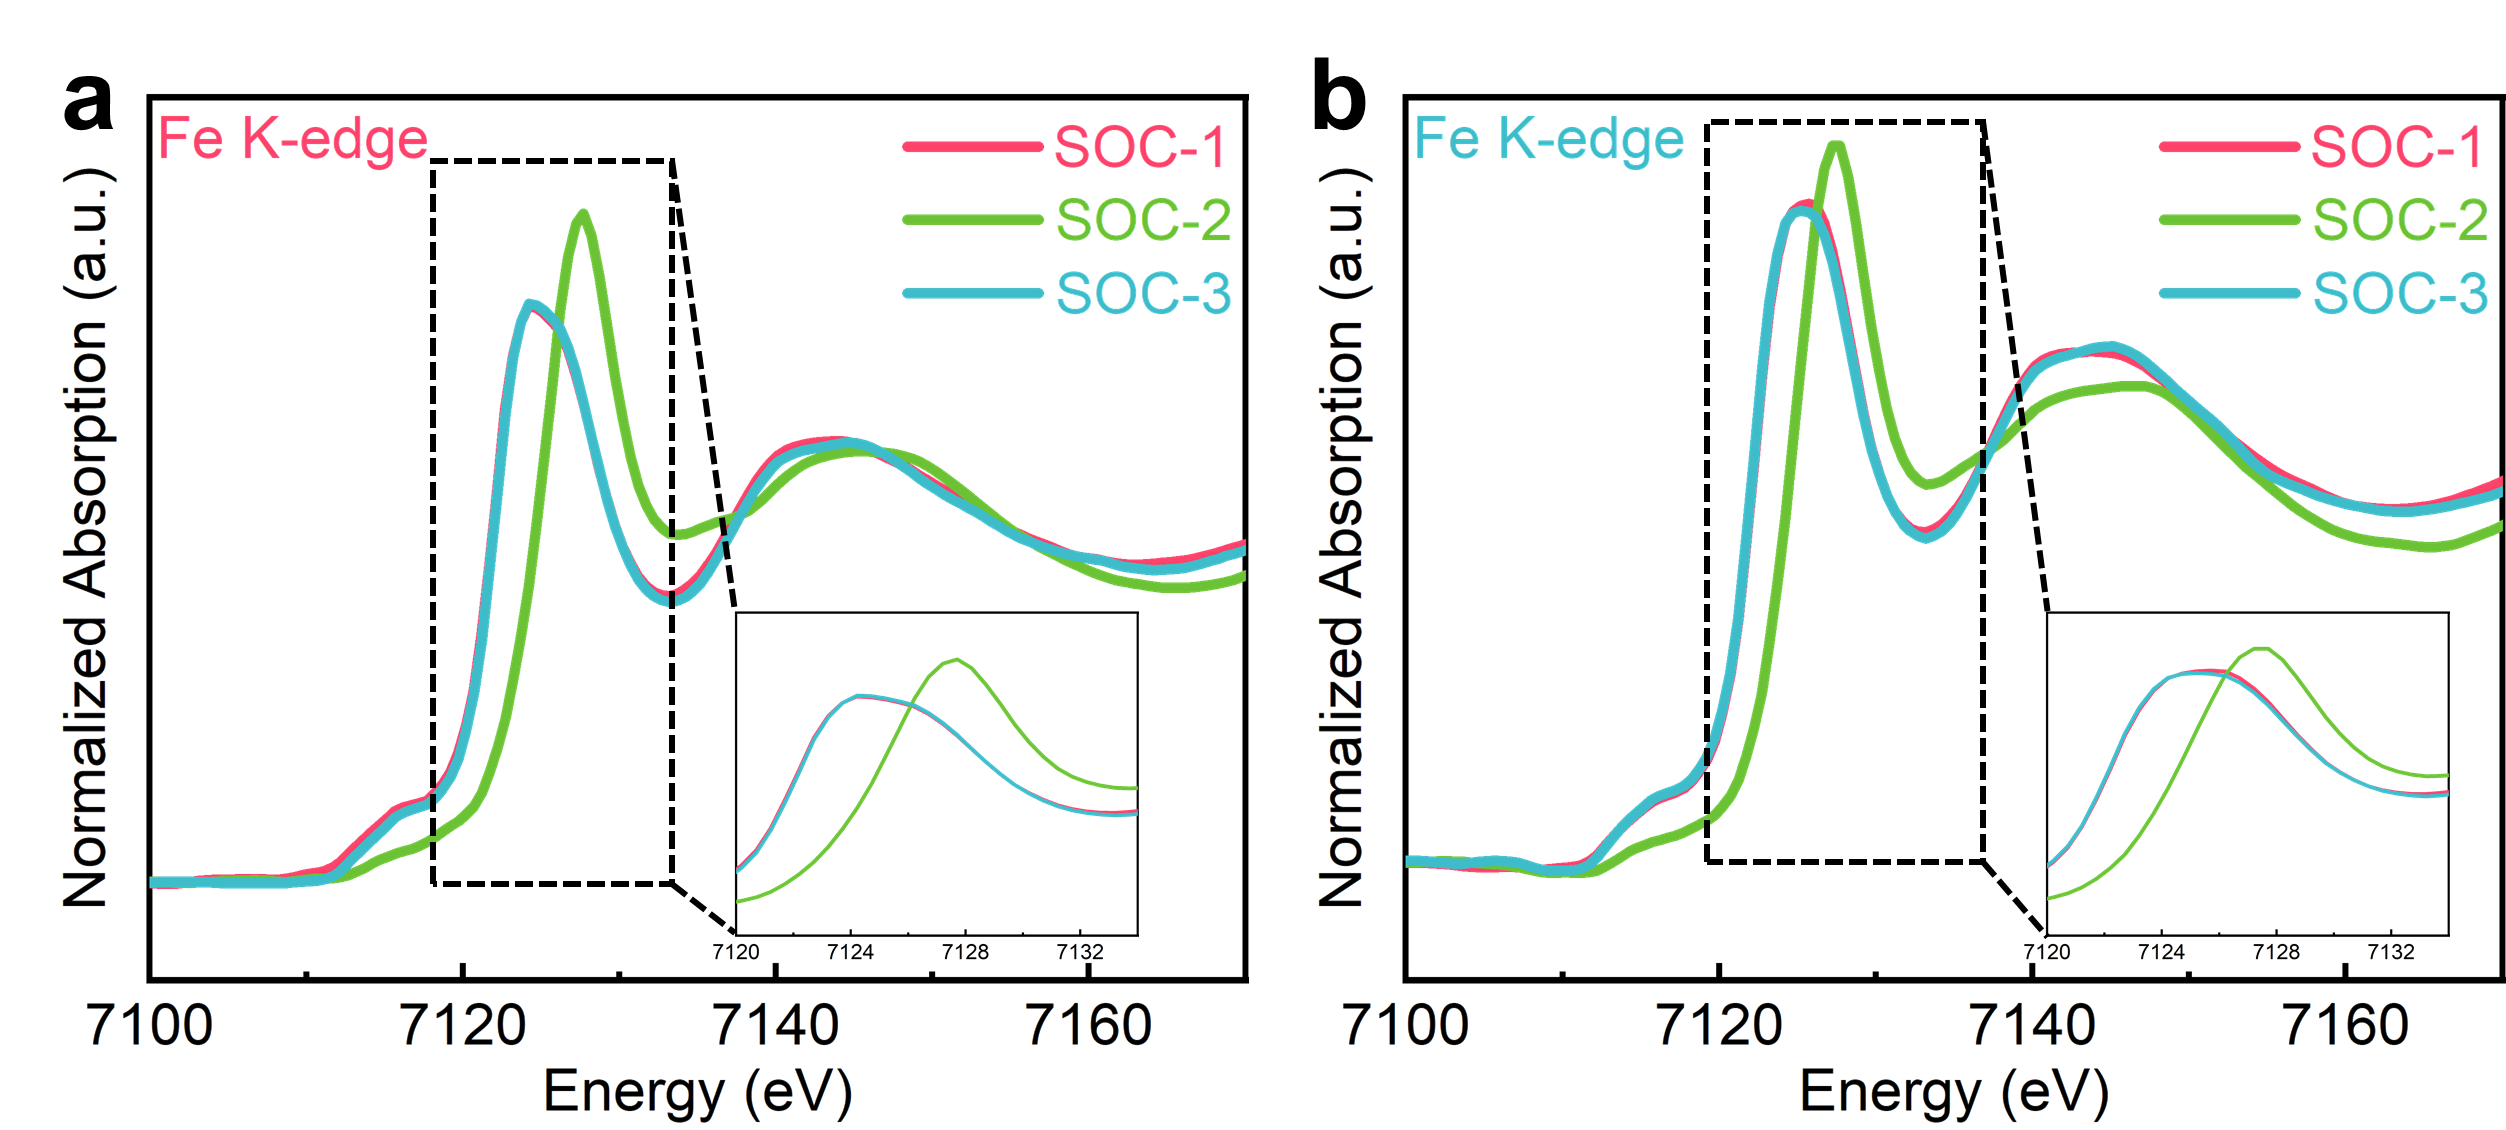


Fig.S27 Ex-situ XANES profiles of **a** M2-PBA and **b** M5-PBA at different SOC with pre-edge in the insets. (The final state of charge for the first discharge cycle was defined as SOC-1, while the charging and discharging final states of charge for the second cycle were defined as SOC-2 and SOC-3, respectively.)


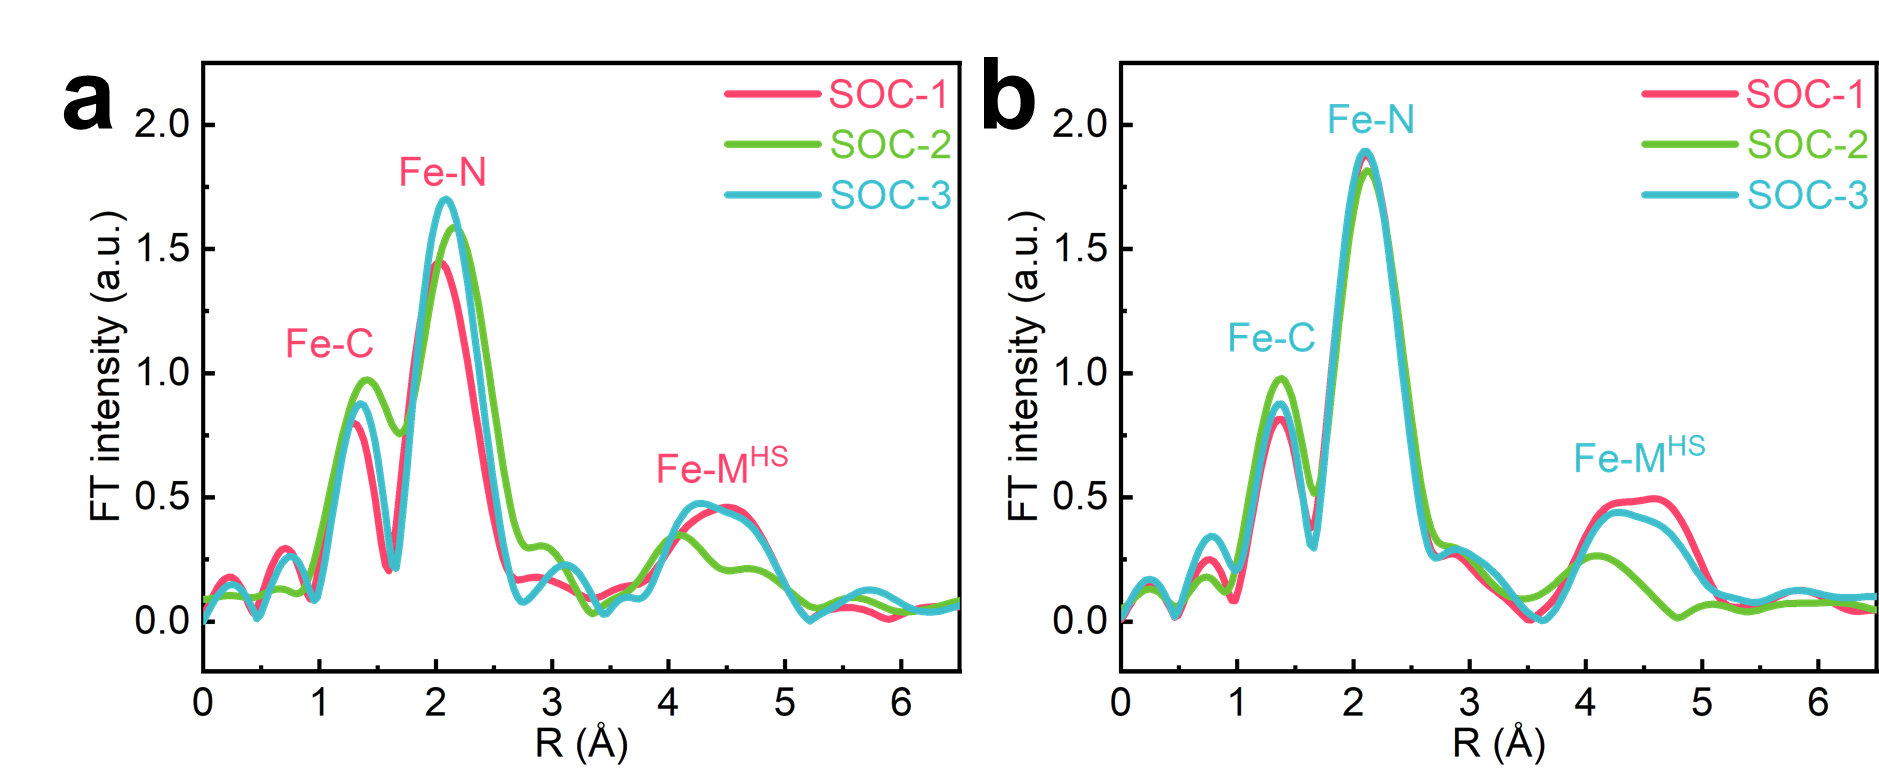


Fig.S28 Ex-situ EXAFS profiles of **a** M2-PBA and **b** M5-PBA at different SOC. (The final state of charge for the first discharge cycle was defined as SOC-1, while the charging and discharging final states of charge for the second cycle were defined as SOC-2 and SOC-3, respectively.)


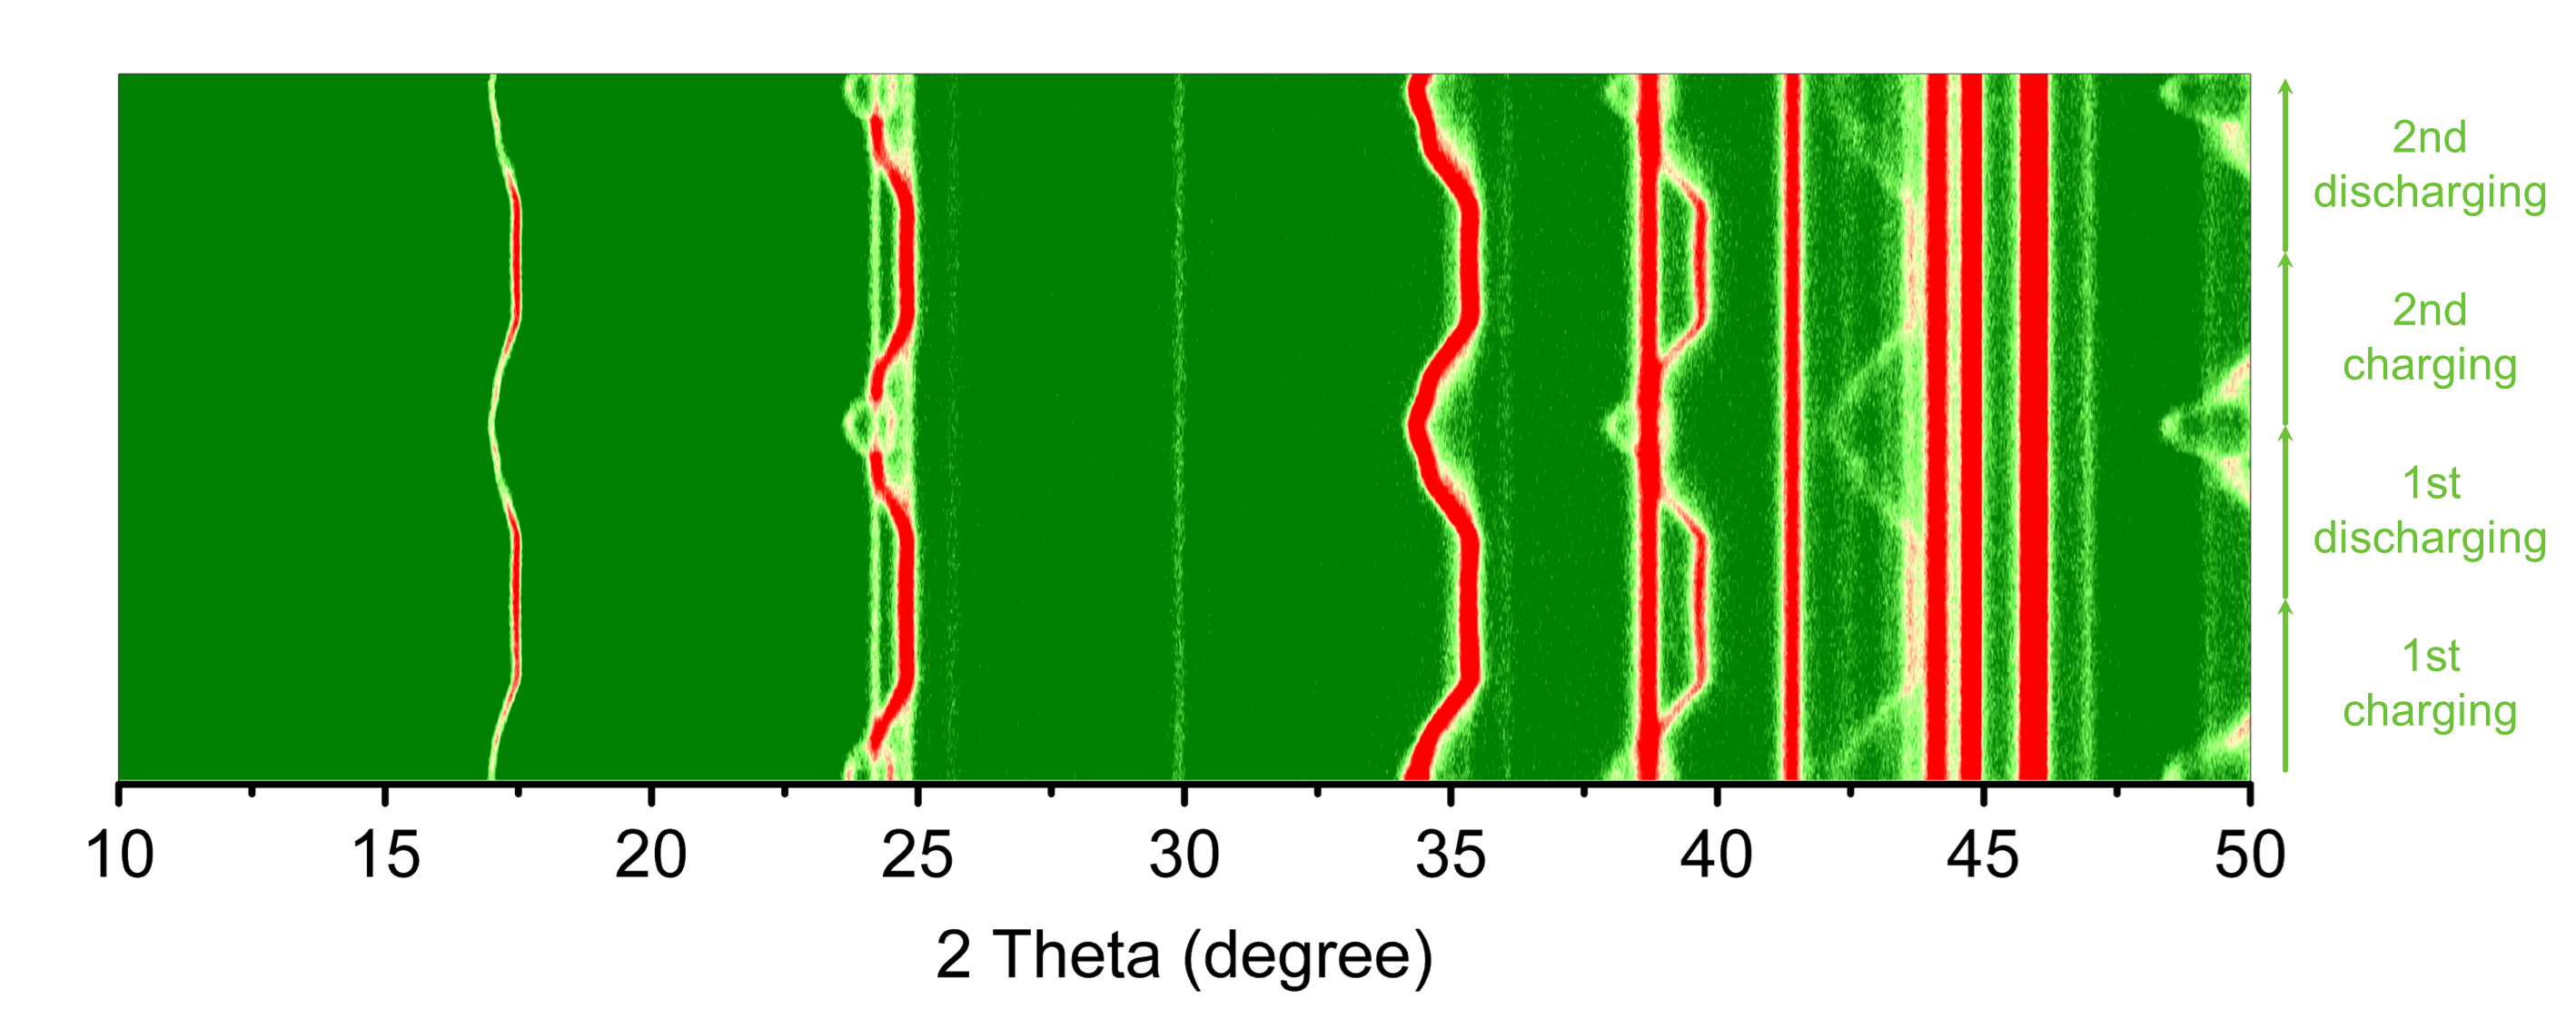


Fig.S29 In-situ XRD full patterns of M4-PBA.


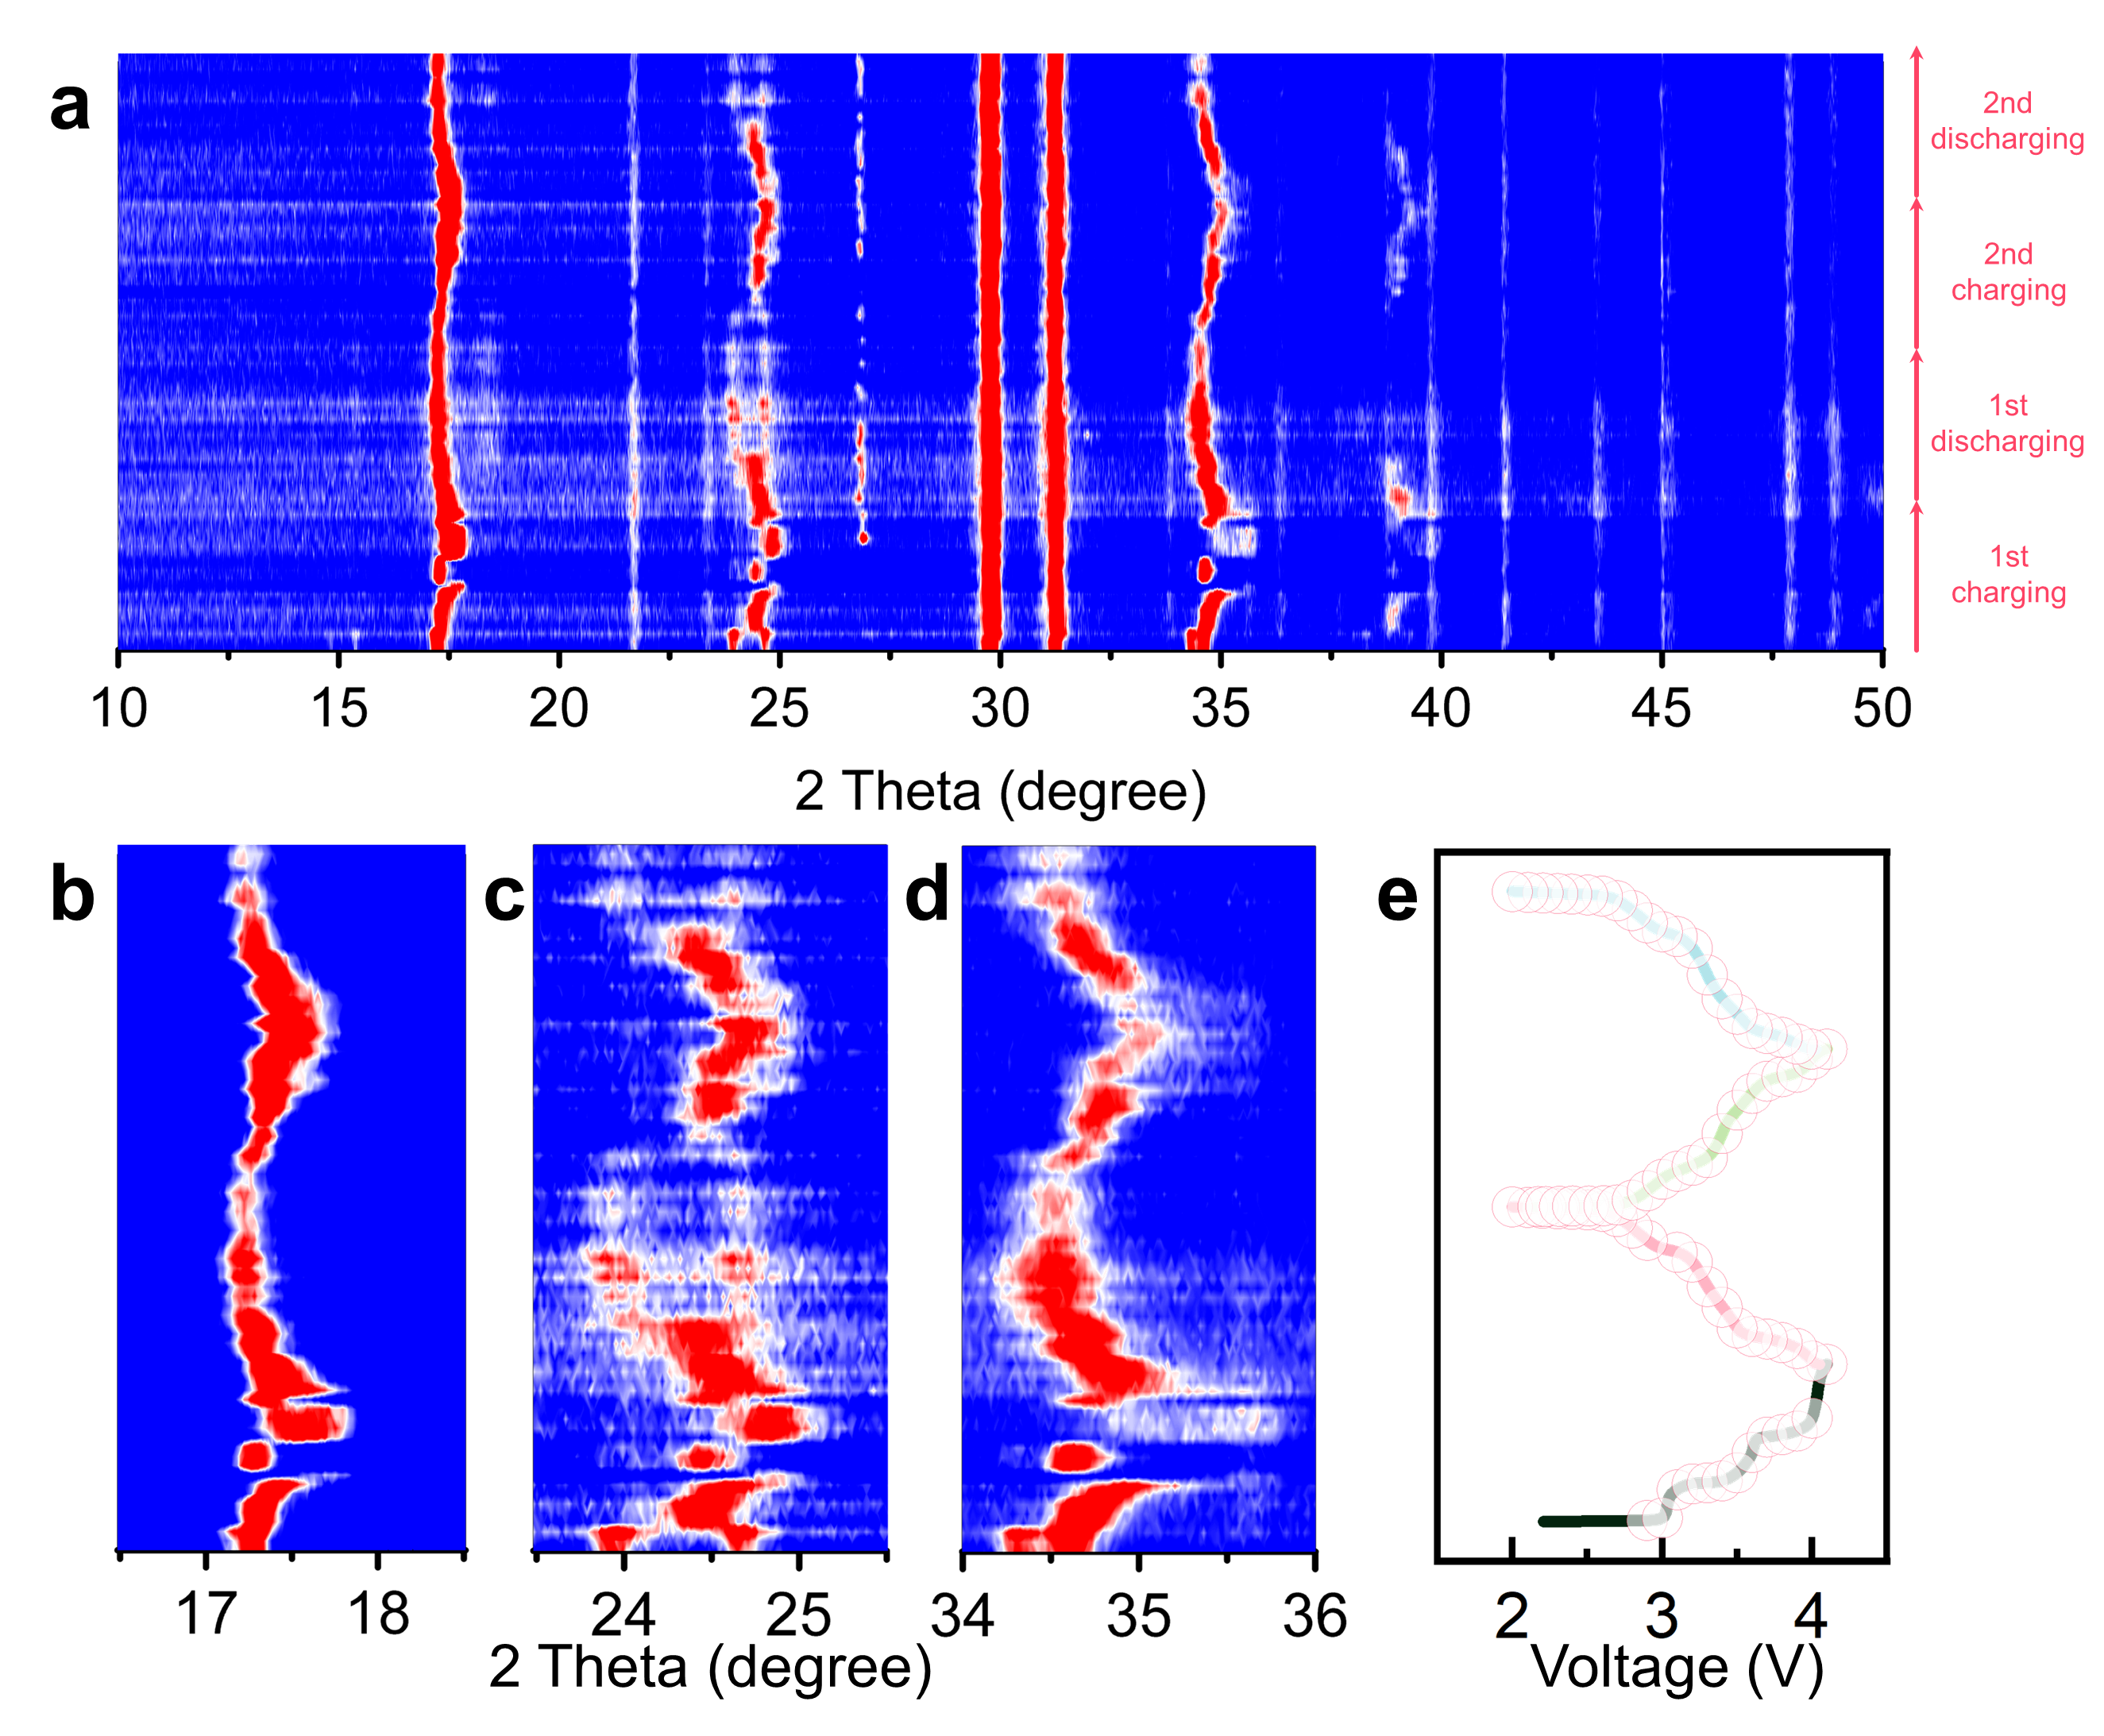


Fig.S30 Ex-situ XRD results of M2-PBA. **a** full pattern, **b-d** detailed patterns and corresponding **e** galvanostatic charge and discharge curves.


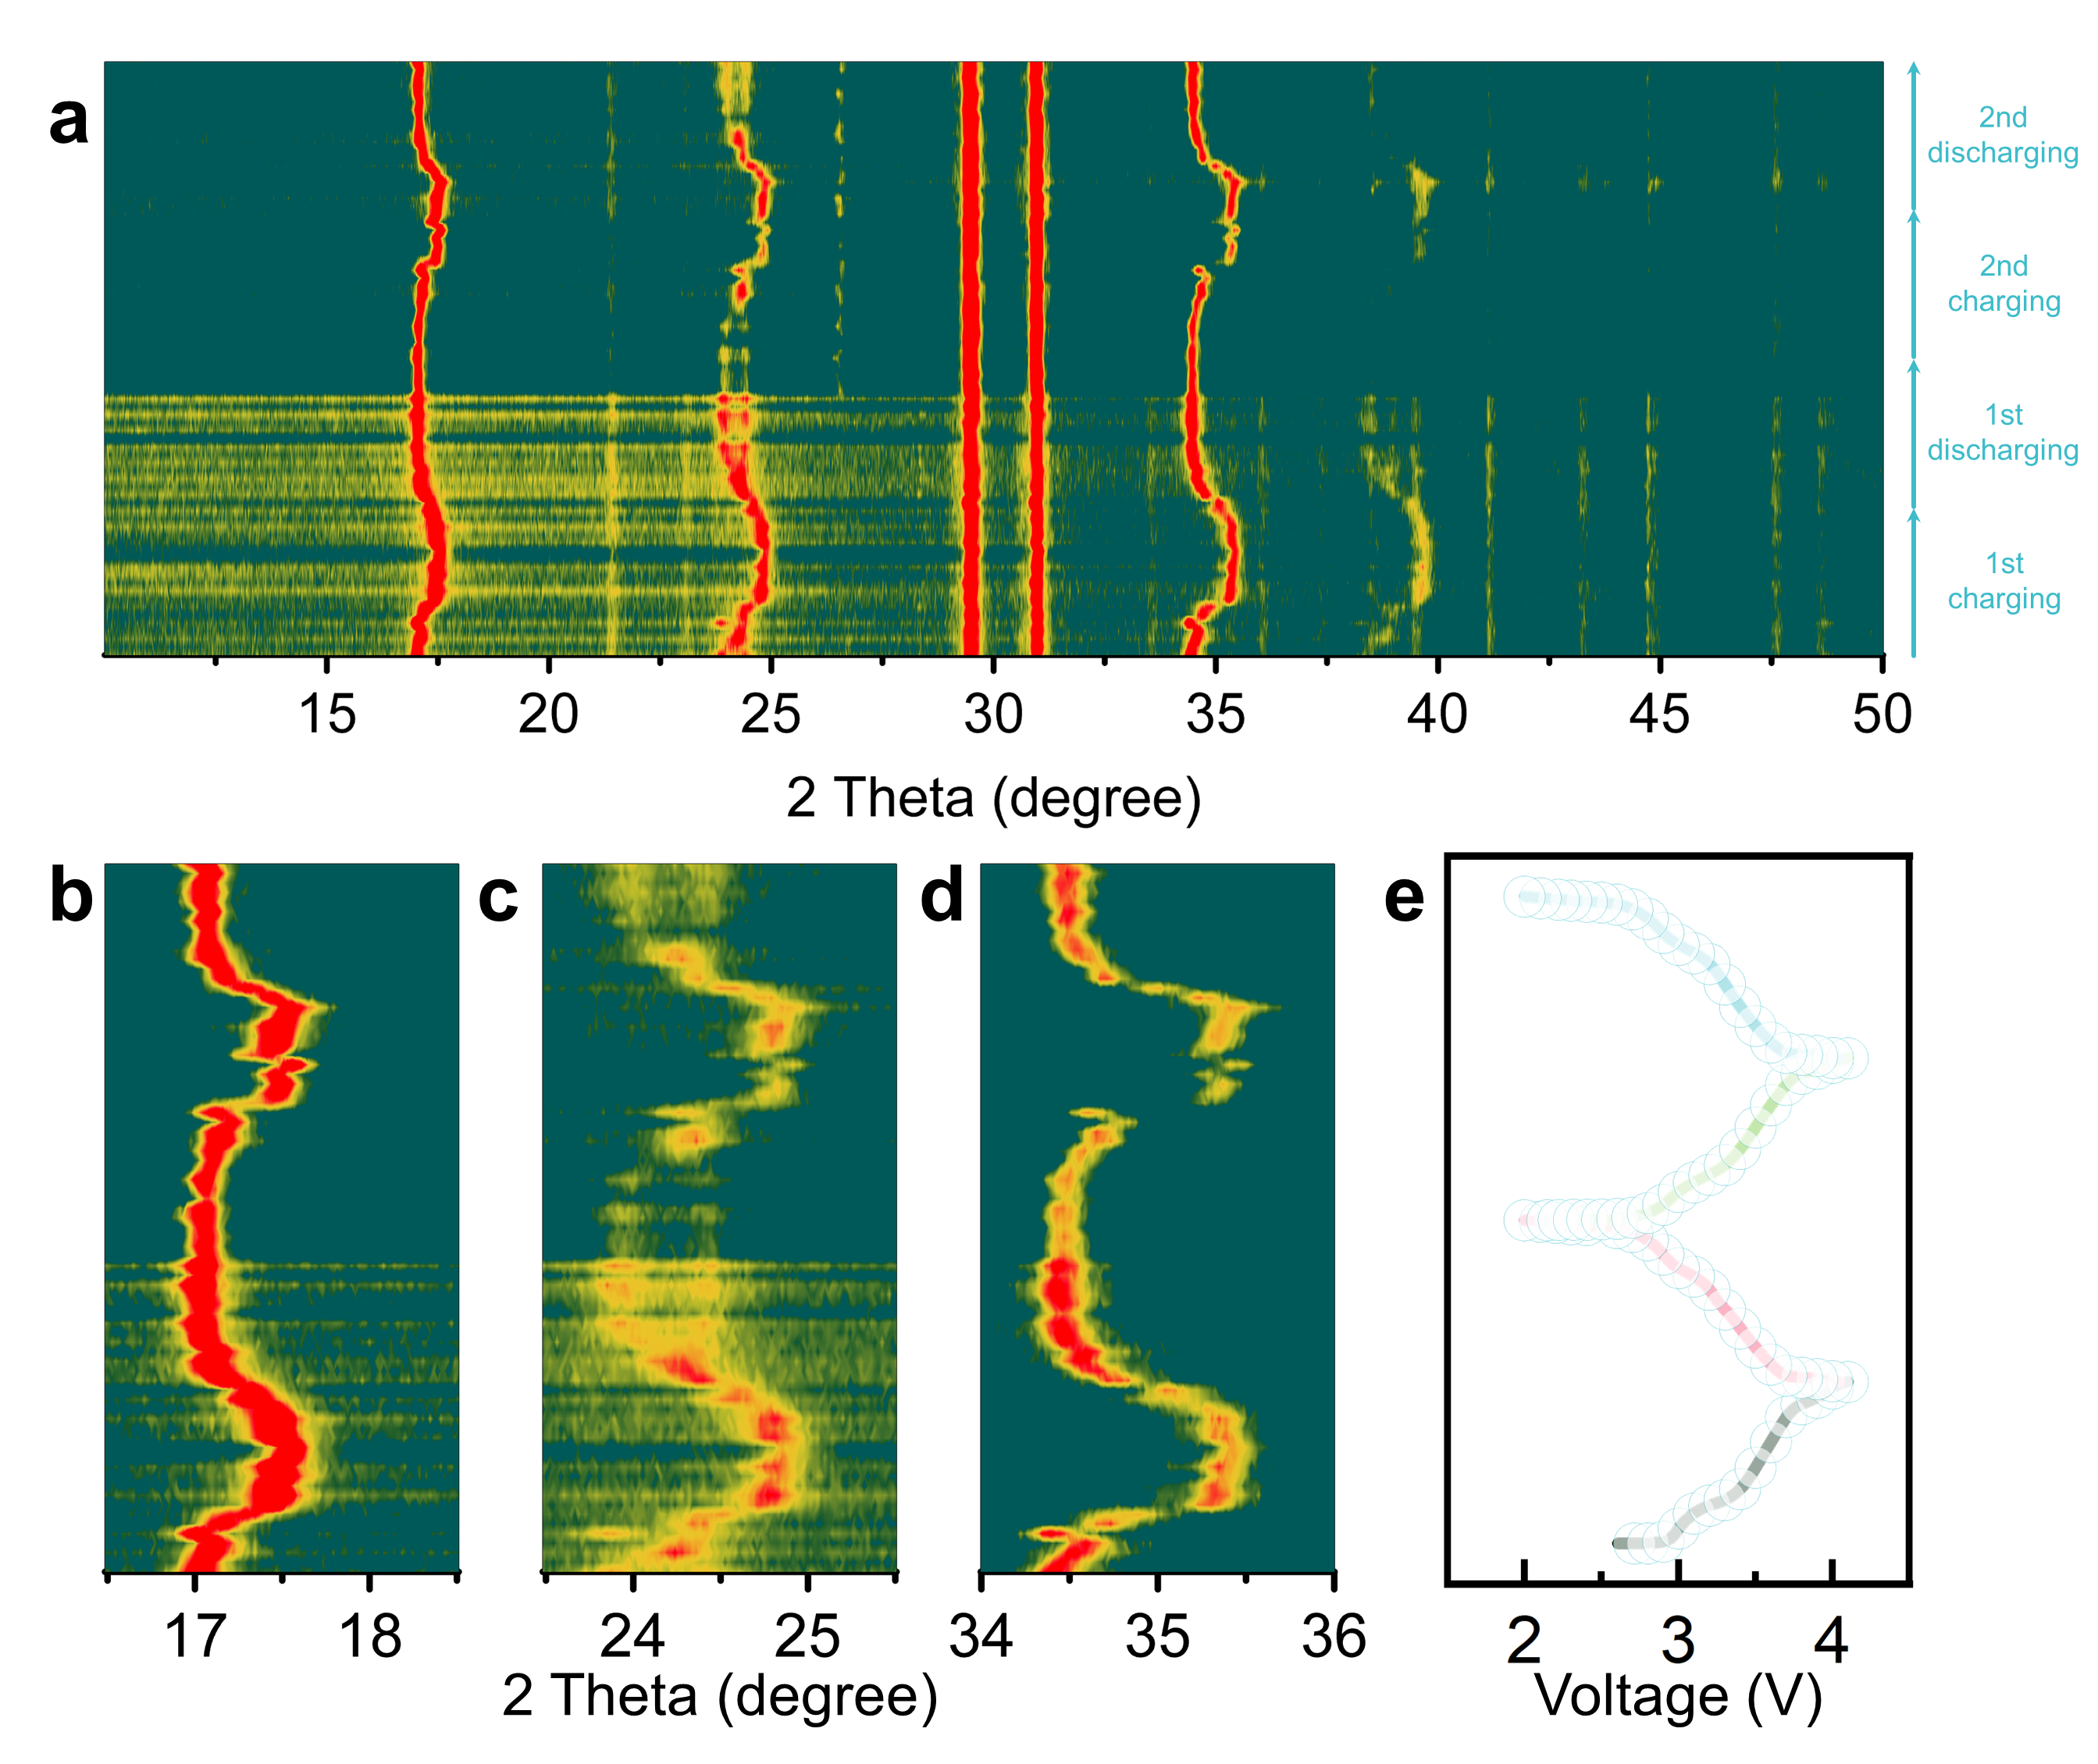


Fig.S31 Ex-situ XRD results of M5-PBA. **a** full pattern, **b-d** detailed patterns and corresponding **e** galvanostatic charge and discharge curves.

**Table S1 Testing results of ICP-OES**

| M5-PBA | Elements | Na | Mn | Fe | Co | Ni | Cu |
| --- | --- | --- | --- | --- | --- | --- | --- |
| Mass (mg/ml) | 4.681 | 0.2178 | 1.1462 | 0.1915 | 0.1913 | 0.1695 |
| Formula | Na1.898Mn0.211Fe0.202 Co0.199 Ni0.198Cu0.190[Fe(CN)6]0.927·0.675H2O | | | | | |
| M4-PBA | Elements | Na | Mn | Fe | Co | Ni |  |
| Mass (mg/ml) | 4.7525 | 0.2745 | 1.2386 | 0.2386 | 0.2309 |  |
| Formula | Na1.927Mn0.266Fe0.247 Co0.248 Ni0.239 [Fe(CN)6]0.943·0.862H2O | | | | | |
| M2-PBA | Elements | Na | Mn | Fe |  |  |  |
| Mass (mg/ml) | 4.538 | 0.5191 | 1.4101 |  |  |  |
| Formula | Na1.84Mn0.503Fe0.497 [Fe(CN)6]0.892·1.633H2O | | | | | |

**Table S2 Rietveld refined result of M2-PBA**

| M2-PBA Monoclinic, space group *P*21/*n*,  *a*=10.54333 Å, *b*=7.4986 Å, *c*=7.27486 Å, *V*=574.610 Å3 | | | | | |
| --- | --- | --- | --- | --- | --- |
| Atom | x | y | z | Occ. | Site |
| C1 | 0.005 | 0.301 | 0.313 | 1 | 4e |
| C2 | 0.183 | 0.5 | 0.5 | 1 | 4e |
| C3 | 0.0034 | 0.6838 | 0.3 | 1 | 4e |
| N1 | 0.0049 | 0.1994 | 0.197 | 1 | 4e |
| N2 | 0.3024 | 0.502 | 0.5022 | 1 | 4e |
| N3 | 0 | 0.8063 | 0.26 | 1 | 4e |
| Na | 0.249 | 0.516 | 0.023 | 1 | 4e |
| Mn | 0 | 0 | 0 | 0.5 | 2a |
| Fe1 | 0 | 0.5 | 0.5 | 1 | 2d |
| Fe2 | 0 | 0 | 0 | 0.5 | 2a |

**Table S3 Rietveld refined result of M4-PBA**

| M4-PBA Monoclinic, space group *P*21/*n*,  *a*=10.20561 Å, *b*=7.36109 Å, *c*=7.13838 Å, *V*=535.735 Å3 | | | | | |
| --- | --- | --- | --- | --- | --- |
| Atom | x | y | z | Occ. | Site |
| C1 | 0.005 | 0.303 | 0.323 | 1 | 4e |
| C2 | 0.183 | 0.517 | 0.523 | 1 | 4e |
| C3 | 0.0034 | 0.6838 | 0.2989 | 1 | 4e |
| N1 | 0.0048 | 0.1984 | 0.197 | 1 | 4e |
| N2 | 0.3022 | 0.504 | 0.5022 | 1 | 4e |
| N3 | 0.003 | 0.8063 | 0.209 | 1 | 4e |
| Na | 0.229 | 0.497 | 0.023 | 1 | 4e |
| Mn | 0 | 0 | 0 | 0.25 | 2a |
| Fe1 | 0 | 0.5 | 0.5 | 1 | 2d |
| Fe2 | 0 | 0 | 0 | 0.25 | 2a |
| Co | 0 | 0 | 0 | 0.25 | 2a |
| Ni | 0 | 0 | 0 | 0.25 | 2a |

**Table S4 Rietveld refined result of M4-PBA**

| M5-PBA Monoclinic, space group *P*21/*n*,  *a*=10.3029 Å, *b*=7.39674 Å, *c*=7.17513 Å, *V*=546.706 Å3 | | | | | |
| --- | --- | --- | --- | --- | --- |
| Atom | x | y | z | Occ. | Site |
| C1 | 0.006 | 0.303 | 0.324 | 1 | 4e |
| C2 | 0.186 | 0.527 | 0.529 | 1 | 4e |
| C3 | 0.0034 | 0.6831 | 0.3002 | 1 | 4e |
| N1 | 0.0052 | 0.1992 | 0.196 | 1 | 4e |
| N2 | 0.3011 | 0.5044 | 0.5016 | 1 | 4e |
| N3 | 0.0025 | 0.806 | 0.207 | 1 | 4e |
| Na | 0.262 | 0.539 | 0.005 | 1 | 4e |
| Mn | 0 | 0 | 0 | 0.2 | 2a |
| Fe1 | 0 | 0.5 | 0.5 | 1 | 2d |
| Fe2 | 0 | 0 | 0 | 0.2 | 2a |
| Co | 0 | 0 | 0 | 0.2 | 2a |
| Ni | 0 | 0 | 0 | 0.2 | 2a |
| Cu | 0 | 0 | 0 | 0.2 | 2a |

**Table S5 Detailed fitting parameters of Mössbauer spectra**

| **M2-PBA** | **IS(mm/s)** | **QS(mm/s)** | **Γ(mm/s)** | **Area(%)** |
| --- | --- | --- | --- | --- |
| High-spin Fe3+ | 0.34 | 1.26 | 0.58 | 4.1 |
| High-spin Fe2+ | 1.11 | 1.23 | 0.8 | 28.9 |
| Low-spin Fe2+ | -0.22 | 0.17 | 0.46 | 67 |

| **M4-PBA** | **IS(mm/s)** | **QS(mm/s)** | **Γ(mm/s)** | **Area(%)** |
| --- | --- | --- | --- | --- |
| High-spin Fe3+ | 0.3 | 0.59 | 0.19 | 2.9 |
| High-spin Fe2+ | 1.06 | 1.19 | 0.41 | 30 |
| Low-spin Fe2+ | -0.22 | 0.13 | 0.36 | 67.1 |

| **M5-PBA** | **IS(mm/s)** | **QS(mm/s)** | **Γ(mm/s)** | **Area(%)** |
| --- | --- | --- | --- | --- |
| High-spin Fe3+ | 0.2 | 0.95 | 0.19 | 2.5 |
| High-spin Fe2+ | 1.02 | 1.18 | 0.5 | 28.2 |
| Low-spin Fe2+ | -0.21 | 0.29 | 0.52 | 69.2 |

**Table S6 Comparison of the electrochemical performance of the as-prepared PBAs with other researcher for SIBs reported within the past three years**

| Samples | Capacity  (mAh·g-1@mA·g-1) | Cycle life  (cycles, retention%@mA·g-1) | Rate performance  (mAh·g-1@ mA·g-1) | Reference |
| --- | --- | --- | --- | --- |
| **M4-PBA** | **142.4@14.875** | **1000, 91.7@743.75** | **85.1@2975** | **This work** |
| MnNiPB-4xcit | 93@100 | 500, 96@100 | 70@4000 | Angew. Chem. Int. Ed.1 |
| HE-PBA | 120@10 | 100, 94@100 | 62@1000 | Adv. Mater.2 |
| R-PB | 145@15 | 3500, 59.1@750 | 93.8@1500 | Adv. Energy Mater.3 |
| HEM-HCF | 117@100 | 200, 90@100 | 79@1000 | Adv. Funct. Mater.4 |
| FeZn-PB | 145@20 | 500, 74.9@1000 | 98.5@1000 | Chemical Engineering Journal5 |
| SC-HEPBA | 115.4@100 | 1000, 76.1@500 | 74.4@3000 | Energy Storage Materials6 |
| HE-HCF | 105.1@15 | 10000, 95@1500 | 55.7@3000 | Angew. Chem. Int. Ed.7 |
| MnHCF-5%Co*x*B | 149@34 | 450, 81@750 | 130@1700 | Angew. Chem. Int. Ed.8 |
| NKPB-3 | 147.9@15 | 300, 83.5@150 | about 105@300 | Angew. Chem. Int. Ed.9 |
| K-FeMnPBA3 | 139.1@100 | 700, 77.1@100 | 118.3@3000 | Adv. Funct. Mater.10 |
| PB-130 | 113.6@30 | 1200, 85.5@1200 | 86@2000 | ACS Nano11 |
| HE-PW | 129@10 | 1000, about 67@500 | 73@500 | Angewandte Chemie International Edition12 |
| PBA(Cu)□Fe | 135.7@20 | 200, 78.5@500 | 77.5@1000 | Adv. Funct. Mater.13 |
| MnCuNi-PBA | 116@10 | 500, 81.8@100 | 66.2@2000 | Adv. Mater.14 |
| MNHCF-3 | about 100@15 | 10000, 90.1@750 | 90.9@3000 | ACS Nano15 |
| SP-PBA | 120.6@25 | 1500, 85.7@500 | 80@2500 | Adv. Mater.16 |
| NaFeHCF@rGO | 124.6@25 | 1000, 81@1000 | 102.4@4000 | Adv. Energy Mater.17 |
| EDTA-1MVC | 122.5@100 | 10000, 86.32@6000 | 82@6000 | Small18 |
| PB-325 | 131@24 | NA | 99@1200 | Chemical Engineering Journal19 |
| AgHCF@CNTs | 168.4@50 | 500, 74@500 | 90.7@2000 | ACS Energy Lett20 |
| HC-PB | 140@34 | 1000, 94.6@1700 | 105@5100 | Energy Storage Materials21 |

**References**

1 Gebert, F. et al. Epitaxial nickel ferrocyanide stabilizes Jahn-Teller distortions of manganese ferrocyanide for sodium-ion batteries. *Angew. Chem. Int. Ed. Engl.* **60**, 18519-18526 (2021).

2 Ma, Y. et al. High-entropy metal-organic frameworks for highly reversible sodium storage. *Adv. Mater.* **33**, e2101342 (2021).

3 Peng, J. et al. Processing rusty metals into versatile prussian blue for sustainable energy storage. *Adv. Energy Mater.* **11**, 2102356 (2021).

4 Ma, Y. et al. Resolving the role of configurational entropy in improving cycling performance of multicomponent hexacyanoferrate cathodes for sodium‐ion batteries. *Adv. Funct. Mater.* **32**, 2202372 (2022).

5 Zhang, L. L. et al. Effect of Zn-substitution induced structural regulation on sodium storage performance of Fe-based Prussian blue. *Chem. Eng. J.* **433**, 133739 (2022).

6 Huang, Y. et al. Boosting the sodium storage performance of Prussian blue analogs by single-crystal and high-entropy approach. *Energy Stor. Mater.* **58**, 1-8 (2023).

7 Peng, J. et al. A disordered rubik's cube-inspired framework for sodium-ion batteries with ultralong cycle lifespan. *Angew. Chem. Int. Ed. Engl.* **62**, e202215865 (2023).

8 Xu, C. et al. Surface engineering stabilizes rhombohedral sodium manganese hexacyanoferrates for high-energy Na-ion batteries. *Angew. Chem. Int. Ed. Engl.* **62**, e202217761 (2023).

9 Zhang, H. et al. Prussian blue analogues with optimized crystal plane orientation and low crystal defects toward 450 Wh kg-1 alkali-ion batteries. *Angew. Chem. Int. Ed. Engl.* **62**, e202303953, (2023).

10 Gao, Y. et al. Structurally stable, low H2O Prussian blue analogs toward high performance sodium storage. *Adv. Funct. Mater.* **34**, 2314860 (2024).

11 Ge, L. et al. Elaborating the crystal water of Prussian blue for outstanding performance of sodium ion batteries. *ACS Nano* **18**, 3542-3552 (2024).

12 He, Y. et al. Entropy-mediated stable structural evolution of Prussian white cathodes for long-life Na-ion batteries. *Angew. Chem. Int. Ed. Engl.* **63**, e202315371 (2024).

13 Liu, J. C. et al. Boosting sodium storage in Prussian blue analogs through iron vacancies and copper doping. *Adv. Funct. Mater.* **34**, 2314167 (2024).

14 Luo, Y. et al. Inhibiting the Jahn-Teller effect of manganese hexacyanoferrate via Ni and Cu codoping for advanced sodium-ion batteries. *Adv. Mater.* **36**, e2405458 (2024).

15 Peng, J. et al. Structural engineering of Prussian blue analogues enabling all-climate and ultralong cycling sodium-ion batteries. *ACS Nano*, **18**, 19854-19864 (2024).

16 Tang, C. et al. Toward ultrahigh rate and cycling performance of cathode materials of sodium ion battery by introducing a bicontinuous porous structure. *Adv. Mater.* **36**, e2402005 (2024).

17 Tang, Y. et al. Epitaxial nucleation of Na*x*FeFe(CN)6@rGO with improved lattice regularity as ultrahigh‐rate cathode for sodium‐ion batteries. *Adv. Energy Mater.* **14**, 202303015 (2024).

18 Wang, Y. et al. Highly crystalline multivariate Prussian blue analogs via equilibrium chelation strategy for stable and fast charging sodium-ion batteries. *Small*, e2403211 (2024).

19 Wang, Z. et al. Charge transfer induced highly active low-spin iron of Prussian blue cathode through calcination strategy for high performance sodium-ion batteries. *Chem. Eng. J.* **488**, 151090 (2024).

20 Zhao, X. Y. et al. Four-electron redox reaction in Prussian blue analogue cathode material for high-rerformance sodium-ion batteries. *ACS Energy Lett.* **9**, 2748-2757 (2024).

21 Ma, H. et al. Medium-mediated high-crystalline Prussian blue toward exceptionally boosted sodium energy storage. *Energy Stor. Mater.* **70**, 103411 (2024).
